# Supplementary material for: Eukaryote diets in Arctic marine nematodes across seasons and shelf-to-basin gradients
Source: Research Square preprint supplement (doi:10.21203/rs.3.rs-6252716/v1), 2025-04-22
Supplement: Supplementary file 1 [file 43d11c489b69174046ad2aa5.docx]

**Supplementary information**

**Title: Eukaryote diets in Arctic marine nematodes across seasons and shelf-to-basin gradients**

Journal: Polar Biology

Snorre Flo1,2*, Bodil Annikki Bluhm1, Camilla Svensen1, Kim Præbel1,3, Anna Vader2

1 Faculty of Biosciences, Fisheries and Economics, UiT The Arctic University of Norway, 9019 Tromsø, Norway
2 Department of Arctic Biology, the University Centre in Svalbard, 9170 Longyearbyen, Svalbard, Norway
3 Department of Forestry and Wildlife Management, Inland Norway University of Applied Sciences, 2406 Elverum, Norway

*Corresponding author is currently unaffiliated and resident in Oslo, Norway.

Supplementary tables

Table S1: Taxonomy of nematode samples acquired in the present study. Nematode samples are summarized according to uniform lowest common ancestor (LCA), and listed with respective taxonomic levels at Order and Family level, in addition to number of nematode samples (n) and identified feeding group from literature (1A: selective deposit, 1B: non-selective deposit, 2A: epistrate, 2B: omnivore-predators). Feeding groups (FG) were assessed from Jensen (1987) and Wieser (1953).

| **Order** | **Family** | **LCA** | **n** | **FG** |
| --- | --- | --- | --- | --- |
| Araeolaimida | Axonolaimidae | Axonolaimidae | 5 | 2B |
| Araeolaimida | Axonolaimoidea_X | Unident_Axonolaimoidea | 3 | NA |
| Araeolaimida | Comesomatidae | Comesomatidae | 14 | 1B |
| Araeolaimida | Diplopeltidae | Diplopeltidae | 5 | 1A |
| Chromadorea_XX | Chromadorea_XXXXX | Unident_Chromadorea | 2 | NA |
| Chromadorida | Chromadoridae | Chromadoridae | 32 | 2A |
| Chromadorida | Cyatholaimidae | Cyatholaimidae | 2 | 2A |
| Desmodorida | Desmodoridae | Desmodoridae | 2 | 2A |
| Desmodorida | Microlaimidae | Microlaimidae | 2 | 2A |
| Ecdysozoa_XXXX | Ecdysozoa_XXXXXXX | Unident_Ecdysozoa | 1 | NA |
| Enoplea_XX | Enoplea_XXXXX | Unident_Enoplea | 1 | NA |
| Enoplia_X | Enoplia_XXXX | Unident_Enoplia | 2 | NA |
| Enoplida | Enchelidiidae | Enchelidiidae | 2 | 2B |
| Enoplida | Enoplidae | Enoplidae | 2 | 2B |
| Enoplida | Enoploidea_X | Unident_Enoploidea | 2 | NA |
| Enoplida | Oncholaimidae | Oncholaimidae | 2 | 2B |
| Enoplida | Oncholaimoidea_X | Unident_Oncholaimoidea | 1 | 2B |
| Enoplida | Oxystominidae | Oxystominidae | 13 | 1A |
| Monhysterida | Linhomoeidae | Linhomoeidae | 1 | 1B |
| Monhysterida | Linhomoeina_XX | Unident_Linhomoeina | 1 | 1B |
| Monhysterida | Monhysteridae | Monhysteridae | 8 | 1B |
| Monhysterida | Monhysterina_XX | Unident_Monhysterina | 10 | NA |
| Monhysterida | Sphaerolaimidae | Sphaerolaimidae | 4 | 2B |
| Monhysterida | Xyalidae | Xyalidae | 11 | 1B |
| Plectida | Aegialoalaimidae | Aegialoalaimidae | 3 | 1A |
| Plectida | Ceramonematidae | Ceramonematidae | 1 | NA |
| Plectida | Diplopeltoididae | Diplopeltoididae | 2 | 1A |
| Triplonchida | Rhabdodemaniidae | Rhabdodemaniidae | 9 | 1B |

Table S2: Full list of Nematode taxonomy acquired by taxonomic binning of BLAST results. Taxonomic identities were curated with the Nemys database (Nemys Eds., 2024), but certain taxonomic levels are not established for all taxa (e.g. Suborder), and some samples were identified at a high taxonomic level. In these cases, NA’s indicate missing information. Attention is directed to Family and LCA parameters, which formed the basis for nematode taxonomy parameters used in analyses.

| **Sample** | **Phylum** | **Class** | **Subclass** | **Order** | **Suborder** | **Superfamily** | **Family** | **Subfamily** | **Genus** | **Species** | **LCA** |
| --- | --- | --- | --- | --- | --- | --- | --- | --- | --- | --- | --- |
| nm_2_6_8 | Ecdysozoa_X | Ecdysozoa_XX | Ecdysozoa_XXX | Ecdysozoa_XXXX | Ecdysozoa_XXXXX | Ecdysozoa_XXXXXX | Ecdysozoa_XXXXXXX | NA | NA | NA | Unident_Ecdysozoa |
| nm_2_7_11 | Nematoda | Chromadorea | Chromadorea_X | Chromadorea_XX | Chromadorea_XXX | Chromadorea_XXXX | Chromadorea_XXXXX | NA | NA | NA | Unident_Chromadorea |
| nm_3_1_7 | Nematoda | Chromadorea | Chromadorea_X | Chromadorea_XX | Chromadorea_XXX | Chromadorea_XXXX | Chromadorea_XXXXX | NA | NA | NA | Unident_Chromadorea |
| nm_1_1_7 | Nematoda | Chromadorea | Chromadoria | Araeolaimida | NA | Axonolaimoidea | Axonolaimoidea_X | NA | NA | NA | Unident_Axonolaimoidea |
| nm_2_1_1 | Nematoda | Chromadorea | Chromadoria | Araeolaimida | NA | Axonolaimoidea | Axonolaimoidea_X | NA | NA | NA | Unident_Axonolaimoidea |
| nm_2_1_7 | Nematoda | Chromadorea | Chromadoria | Araeolaimida | NA | Axonolaimoidea | Axonolaimoidea_X | NA | NA | NA | Unident_Axonolaimoidea |
| nm_1_1_6 | Nematoda | Chromadorea | Chromadoria | Araeolaimida | NA | Axonolaimoidea | Axonolaimidae | NA | Axonolaimus | NA | Axonolaimidae |
| nm_2_4_1 | Nematoda | Chromadorea | Chromadoria | Araeolaimida | NA | Axonolaimoidea | Axonolaimidae | NA | Axonolaimus | NA | Axonolaimidae |
| nm_2_4_11 | Nematoda | Chromadorea | Chromadoria | Araeolaimida | NA | Axonolaimoidea | Axonolaimidae | NA | Axonolaimus | NA | Axonolaimidae |
| nm_3_4_11 | Nematoda | Chromadorea | Chromadoria | Araeolaimida | NA | Axonolaimoidea | Axonolaimidae | NA | Axonolaimus | NA | Axonolaimidae |
| nm_3_4_3 | Nematoda | Chromadorea | Chromadoria | Araeolaimida | NA | Axonolaimoidea | Axonolaimidae | NA | Axonolaimus | NA | Axonolaimidae |
| nm_3_6_6 | Nematoda | Chromadorea | Chromadoria | Araeolaimida | NA | Axonolaimoidea | Diplopeltidae | Diplopeltinae | Diplopeltula | unclassified_Diplopeltula | Diplopeltidae |
| nm_1_1_1 | Nematoda | Chromadorea | Chromadoria | Araeolaimida | NA | Axonolaimoidea | Comesomatidae | NA | NA | NA | Comesomatidae |
| nm_1_1_5 | Nematoda | Chromadorea | Chromadoria | Araeolaimida | NA | Axonolaimoidea | Comesomatidae | NA | NA | NA | Comesomatidae |
| nm_1_1_8 | Nematoda | Chromadorea | Chromadoria | Araeolaimida | NA | Axonolaimoidea | Comesomatidae | NA | NA | NA | Comesomatidae |
| nm_1_6_3 | Nematoda | Chromadorea | Chromadoria | Araeolaimida | NA | Axonolaimoidea | Comesomatidae | NA | NA | NA | Comesomatidae |
| nm_2_1_4 | Nematoda | Chromadorea | Chromadoria | Araeolaimida | NA | Axonolaimoidea | Comesomatidae | NA | NA | NA | Comesomatidae |
| nm_2_1_6 | Nematoda | Chromadorea | Chromadoria | Araeolaimida | NA | Axonolaimoidea | Comesomatidae | NA | NA | NA | Comesomatidae |
| nm_2_4_8 | Nematoda | Chromadorea | Chromadoria | Araeolaimida | NA | Axonolaimoidea | Comesomatidae | NA | NA | NA | Comesomatidae |
| nm_2_1_10 | Nematoda | Chromadorea | Chromadoria | Araeolaimida | NA | Axonolaimoidea | Comesomatidae | Comesomatinae | Comesoma | NA | Comesomatidae |
| nm_1_4_1 | Nematoda | Chromadorea | Chromadoria | Araeolaimida | NA | Axonolaimoidea | Comesomatidae | Sabatieriinae | Pierrickia | unclassified_Pierrickia | Comesomatidae |
| nm_2_4_2 | Nematoda | Chromadorea | Chromadoria | Araeolaimida | NA | Axonolaimoidea | Comesomatidae | Sabatieriinae | Pierrickia | unclassified_Pierrickia | Comesomatidae |
| nm_2_4_4 | Nematoda | Chromadorea | Chromadoria | Araeolaimida | NA | Axonolaimoidea | Comesomatidae | Sabatieriinae | Pierrickia | unclassified_Pierrickia | Comesomatidae |
| nm_2_4_9 | Nematoda | Chromadorea | Chromadoria | Araeolaimida | NA | Axonolaimoidea | Comesomatidae | Sabatieriinae | Pierrickia | unclassified_Pierrickia | Comesomatidae |
| nm_3_4_10 | Nematoda | Chromadorea | Chromadoria | Araeolaimida | NA | Axonolaimoidea | Comesomatidae | Sabatieriinae | Pierrickia | unclassified_Pierrickia | Comesomatidae |
| nm_2_1_3 | Nematoda | Chromadorea | Chromadoria | Araeolaimida | NA | Axonolaimoidea | Comesomatidae | Sabatieriinae | Setosabatieria | unclassified_Setosabatieria | Comesomatidae |
| nm_4_6_8 | Nematoda | Chromadorea | Chromadoria | Araeolaimida | NA | Axonolaimoidea | Diplopeltidae | Diplopeltinae | Araeolaimus | unclassified_Araeolaimus | Diplopeltidae |
| nm_2_1_5 | Nematoda | Chromadorea | Chromadoria | Araeolaimida | NA | Axonolaimoidea | Diplopeltidae | Diplopeltinae | Campylaimus | NA | Diplopeltidae |
| nm_1_6_7 | Nematoda | Chromadorea | Chromadoria | Araeolaimida | NA | Axonolaimoidea | Diplopeltidae | Cylindrolaiminae | Cylindrolaimus | unclassified_Cylindrolaimus | Diplopeltidae |
| nm_2_6_6 | Nematoda | Chromadorea | Chromadoria | Araeolaimida | NA | Axonolaimoidea | Diplopeltidae | Cylindrolaiminae | Cylindrolaimus | unclassified_Cylindrolaimus | Diplopeltidae |
| nm_1_6_2 | Nematoda | Chromadorea | Chromadoria | Chromadorida | Chromadorina | Chromadoroidea | Chromadoridae | NA | NA | NA | Chromadoridae |
| nm_2_4_10 | Nematoda | Chromadorea | Chromadoria | Chromadorida | Chromadorina | Chromadoroidea | Chromadoridae | NA | NA | NA | Chromadoridae |
| nm_2_4_3 | Nematoda | Chromadorea | Chromadoria | Chromadorida | Chromadorina | Chromadoroidea | Chromadoridae | NA | NA | NA | Chromadoridae |
| nm_2_6_10 | Nematoda | Chromadorea | Chromadoria | Chromadorida | Chromadorina | Chromadoroidea | Chromadoridae | NA | NA | NA | Chromadoridae |
| nm_2_6_3 | Nematoda | Chromadorea | Chromadoria | Chromadorida | Chromadorina | Chromadoroidea | Chromadoridae | NA | NA | NA | Chromadoridae |
| nm_2_6_9 | Nematoda | Chromadorea | Chromadoria | Chromadorida | Chromadorina | Chromadoroidea | Chromadoridae | NA | NA | NA | Chromadoridae |
| nm_2_7_5 | Nematoda | Chromadorea | Chromadoria | Chromadorida | Chromadorina | Chromadoroidea | Chromadoridae | NA | NA | NA | Chromadoridae |
| nm_3_1_2 | Nematoda | Chromadorea | Chromadoria | Chromadorida | Chromadorina | Chromadoroidea | Chromadoridae | NA | NA | NA | Chromadoridae |
| nm_3_1_3 | Nematoda | Chromadorea | Chromadoria | Chromadorida | Chromadorina | Chromadoroidea | Chromadoridae | NA | NA | NA | Chromadoridae |
| nm_3_1_4 | Nematoda | Chromadorea | Chromadoria | Chromadorida | Chromadorina | Chromadoroidea | Chromadoridae | NA | NA | NA | Chromadoridae |
| nm_3_1_8 | Nematoda | Chromadorea | Chromadoria | Chromadorida | Chromadorina | Chromadoroidea | Chromadoridae | NA | NA | NA | Chromadoridae |
| nm_3_1_9 | Nematoda | Chromadorea | Chromadoria | Chromadorida | Chromadorina | Chromadoroidea | Chromadoridae | NA | NA | NA | Chromadoridae |
| nm_3_4_2 | Nematoda | Chromadorea | Chromadoria | Chromadorida | Chromadorina | Chromadoroidea | Chromadoridae | NA | NA | NA | Chromadoridae |
| nm_3_4_5 | Nematoda | Chromadorea | Chromadoria | Chromadorida | Chromadorina | Chromadoroidea | Chromadoridae | NA | NA | NA | Chromadoridae |
| nm_3_4_7 | Nematoda | Chromadorea | Chromadoria | Chromadorida | Chromadorina | Chromadoroidea | Chromadoridae | NA | NA | NA | Chromadoridae |
| nm_3_4_8 | Nematoda | Chromadorea | Chromadoria | Chromadorida | Chromadorina | Chromadoroidea | Chromadoridae | NA | NA | NA | Chromadoridae |
| nm_3_4_9 | Nematoda | Chromadorea | Chromadoria | Chromadorida | Chromadorina | Chromadoroidea | Chromadoridae | NA | NA | NA | Chromadoridae |
| nm_3_6_11 | Nematoda | Chromadorea | Chromadoria | Chromadorida | Chromadorina | Chromadoroidea | Chromadoridae | NA | NA | NA | Chromadoridae |
| nm_3_6_5 | Nematoda | Chromadorea | Chromadoria | Chromadorida | Chromadorina | Chromadoroidea | Chromadoridae | NA | NA | NA | Chromadoridae |
| nm_3_7_8 | Nematoda | Chromadorea | Chromadoria | Chromadorida | Chromadorina | Chromadoroidea | Chromadoridae | NA | NA | NA | Chromadoridae |
| nm_4_4_10 | Nematoda | Chromadorea | Chromadoria | Chromadorida | Chromadorina | Chromadoroidea | Chromadoridae | NA | NA | NA | Chromadoridae |
| nm_4_4_11 | Nematoda | Chromadorea | Chromadoria | Chromadorida | Chromadorina | Chromadoroidea | Chromadoridae | NA | NA | NA | Chromadoridae |
| nm_4_4_4 | Nematoda | Chromadorea | Chromadoria | Chromadorida | Chromadorina | Chromadoroidea | Chromadoridae | NA | NA | NA | Chromadoridae |
| nm_4_4_6 | Nematoda | Chromadorea | Chromadoria | Chromadorida | Chromadorina | Chromadoroidea | Chromadoridae | NA | NA | NA | Chromadoridae |
| nm_4_6_11 | Nematoda | Chromadorea | Chromadoria | Chromadorida | Chromadorina | Chromadoroidea | Chromadoridae | NA | NA | NA | Chromadoridae |
| nm_4_6_7 | Nematoda | Chromadorea | Chromadoria | Chromadorida | Chromadorina | Chromadoroidea | Chromadoridae | NA | NA | NA | Chromadoridae |
| nm_4_6_9 | Nematoda | Chromadorea | Chromadoria | Chromadorida | Chromadorina | Chromadoroidea | Chromadoridae | NA | NA | NA | Chromadoridae |
| nm_3_1_11 | Nematoda | Chromadorea | Chromadoria | Chromadorida | Chromadorina | Chromadoroidea | Chromadoridae | Euchromadorinae | Actinonema | NA | Chromadoridae |
| nm_3_4_1 | Nematoda | Chromadorea | Chromadoria | Chromadorida | Chromadorina | Chromadoroidea | Chromadoridae | Euchromadorinae | Actinonema | NA | Chromadoridae |
| nm_4_4_3 | Nematoda | Chromadorea | Chromadoria | Chromadorida | Chromadorina | Chromadoroidea | Chromadoridae | Euchromadorinae | Actinonema | NA | Chromadoridae |
| nm_4_4_8 | Nematoda | Chromadorea | Chromadoria | Chromadorida | Chromadorina | Chromadoroidea | Chromadoridae | Euchromadorinae | Actinonema | NA | Chromadoridae |
| nm_4_4_9 | Nematoda | Chromadorea | Chromadoria | Chromadorida | Chromadorina | Chromadoroidea | Chromadoridae | Euchromadorinae | Actinonema | NA | Chromadoridae |
| nm_1_6_1 | Nematoda | Chromadorea | Chromadoria | Chromadorida | Chromadorina | Chromadoroidea | Cyatholaimidae | NA | Pomponema | unclassified_Pomponema | Cyatholaimidae |
| nm_2_6_1 | Nematoda | Chromadorea | Chromadoria | Chromadorida | Chromadorina | Chromadoroidea | Cyatholaimidae | NA | Pomponema | unclassified_Pomponema | Cyatholaimidae |
| nm_3_6_1 | Nematoda | Chromadorea | Chromadoria | Desmodorida | Desmodorina | Desmodoroidea | Desmodoridae | NA | NA | NA | Desmodoridae |
| nm_4_6_1 | Nematoda | Chromadorea | Chromadoria | Desmodorida | Desmodorina | Desmodoroidea | Desmodoridae | NA | NA | NA | Desmodoridae |
| nm_1_6_5 | Nematoda | Chromadorea | Chromadoria | Desmodorida | Desmodorina | NA | Microlaimidae | NA | NA | NA | Microlaimidae |
| nm_2_6_7 | Nematoda | Chromadorea | Chromadoria | Desmodorida | Desmodorina | NA | Microlaimidae | NA | NA | NA | Microlaimidae |
| nm_1_1_2 | Nematoda | Chromadorea | Chromadoria | Monhysterida | Linhomoeina | Linhomoeina_X | Linhomoeina_XX | NA | NA | NA | Unident_Linhomoeina |
| nm_1_6_9 | Nematoda | Chromadorea | Chromadoria | Monhysterida | Linhomoeina | Siphonolaimoidea | Linhomoeidae | Desmolaiminae | Desmolaimus | unclassified_Desmolaimus | Linhomoeidae |
| nm_1_1_10 | Nematoda | Chromadorea | Chromadoria | Monhysterida | Monhysterina | Monhysterina_X | Monhysterina_XX | NA | NA | NA | Unident_Monhysterina |
| nm_1_1_11 | Nematoda | Chromadorea | Chromadoria | Monhysterida | Monhysterina | Monhysterina_X | Monhysterina_XX | NA | NA | NA | Unident_Monhysterina |
| nm_1_1_9 | Nematoda | Chromadorea | Chromadoria | Monhysterida | Monhysterina | Monhysterina_X | Monhysterina_XX | NA | NA | NA | Unident_Monhysterina |
| nm_1_4_11 | Nematoda | Chromadorea | Chromadoria | Monhysterida | Monhysterina | Monhysterina_X | Monhysterina_XX | NA | NA | NA | Unident_Monhysterina |
| nm_1_4_2 | Nematoda | Chromadorea | Chromadoria | Monhysterida | Monhysterina | Monhysterina_X | Monhysterina_XX | NA | NA | NA | Unident_Monhysterina |
| nm_2_6_4 | Nematoda | Chromadorea | Chromadoria | Monhysterida | Monhysterina | Monhysterina_X | Monhysterina_XX | NA | NA | NA | Unident_Monhysterina |
| nm_2_6_5 | Nematoda | Chromadorea | Chromadoria | Monhysterida | Monhysterina | Monhysterina_X | Monhysterina_XX | NA | NA | NA | Unident_Monhysterina |
| nm_3_4_4 | Nematoda | Chromadorea | Chromadoria | Monhysterida | Monhysterina | Monhysterina_X | Monhysterina_XX | NA | NA | NA | Unident_Monhysterina |
| nm_3_6_3 | Nematoda | Chromadorea | Chromadoria | Monhysterida | Monhysterina | Monhysterina_X | Monhysterina_XX | NA | NA | NA | Unident_Monhysterina |
| nm_4_4_7 | Nematoda | Chromadorea | Chromadoria | Monhysterida | Monhysterina | Monhysterina_X | Monhysterina_XX | NA | NA | NA | Unident_Monhysterina |
| nm_1_6_8 | Nematoda | Chromadorea | Chromadoria | Monhysterida | Monhysterina | Monhysteroidea | Monhysteridae | NA | NA | NA | Monhysteridae |
| nm_2_6_11 | Nematoda | Chromadorea | Chromadoria | Monhysterida | Monhysterina | Monhysteroidea | Monhysteridae | NA | NA | NA | Monhysteridae |
| nm_2_7_3 | Nematoda | Chromadorea | Chromadoria | Monhysterida | Monhysterina | Monhysteroidea | Monhysteridae | NA | Eumonhystera | Eumonhystera_filiformis | Monhysteridae |
| nm_2_7_7 | Nematoda | Chromadorea | Chromadoria | Monhysterida | Monhysterina | Monhysteroidea | Monhysteridae | NA | Eumonhystera | Eumonhystera_filiformis | Monhysteridae |
| nm_2_7_8 | Nematoda | Chromadorea | Chromadoria | Monhysterida | Monhysterina | Monhysteroidea | Monhysteridae | NA | Eumonhystera | Eumonhystera_filiformis | Monhysteridae |
| nm_2_7_9 | Nematoda | Chromadorea | Chromadoria | Monhysterida | Monhysterina | Monhysteroidea | Monhysteridae | NA | Eumonhystera | Eumonhystera_filiformis | Monhysteridae |
| nm_1_6_10 | Nematoda | Chromadorea | Chromadoria | Monhysterida | Monhysterina | Monhysteroidea | Monhysteridae | NA | Monhystera | unclassified_Monhystera | Monhysteridae |
| nm_2_7_6 | Nematoda | Chromadorea | Chromadoria | Monhysterida | Monhysterina | Monhysteroidea | Monhysteridae | NA | Monhystera | unclassified_Monhystera | Monhysteridae |
| nm_2_1_2 | Nematoda | Chromadorea | Chromadoria | Monhysterida | Monhysterina | Sphaerolaimoidea | Sphaerolaimidae | Sphaerolaiminae | Sphaerolaimus | NA | Sphaerolaimidae |
| nm_2_4_7 | Nematoda | Chromadorea | Chromadoria | Monhysterida | Monhysterina | Sphaerolaimoidea | Sphaerolaimidae | Sphaerolaiminae | Sphaerolaimus | NA | Sphaerolaimidae |
| nm_3_1_10 | Nematoda | Chromadorea | Chromadoria | Monhysterida | Monhysterina | Sphaerolaimoidea | Sphaerolaimidae | Sphaerolaiminae | Sphaerolaimus | NA | Sphaerolaimidae |
| nm_3_7_11 | Nematoda | Chromadorea | Chromadoria | Monhysterida | Monhysterina | Sphaerolaimoidea | Sphaerolaimidae | Sphaerolaiminae | Sphaerolaimus | NA | Sphaerolaimidae |
| nm_4_4_2 | Nematoda | Chromadorea | Chromadoria | Monhysterida | Monhysterina | Sphaerolaimoidea | Xyalidae | NA | Daptonema | NA | Xyalidae |
| nm_3_7_1 | Nematoda | Chromadorea | Chromadoria | Monhysterida | Monhysterina | Sphaerolaimoidea | Xyalidae | NA | Daptonema | Daptonema_hirsutum | Xyalidae |
| nm_3_7_2 | Nematoda | Chromadorea | Chromadoria | Monhysterida | Monhysterina | Sphaerolaimoidea | Xyalidae | NA | Daptonema | Daptonema_hirsutum | Xyalidae |
| nm_3_7_4 | Nematoda | Chromadorea | Chromadoria | Monhysterida | Monhysterina | Sphaerolaimoidea | Xyalidae | NA | Daptonema | Daptonema_hirsutum | Xyalidae |
| nm_3_7_5 | Nematoda | Chromadorea | Chromadoria | Monhysterida | Monhysterina | Sphaerolaimoidea | Xyalidae | NA | Daptonema | Daptonema_hirsutum | Xyalidae |
| nm_3_1_5 | Nematoda | Chromadorea | Chromadoria | Monhysterida | Monhysterina | Sphaerolaimoidea | Xyalidae | NA | Elzalia | unclassified_Elzalia | Xyalidae |
| nm_3_7_7 | Nematoda | Chromadorea | Chromadoria | Monhysterida | Monhysterina | Sphaerolaimoidea | Xyalidae | NA | Elzalia | unclassified_Elzalia | Xyalidae |
| nm_1_6_4 | Nematoda | Chromadorea | Chromadoria | Monhysterida | Monhysterina | Sphaerolaimoidea | Xyalidae | NA | Theristus | Theristus_agilis | Xyalidae |
| nm_3_1_1 | Nematoda | Chromadorea | Chromadoria | Monhysterida | Monhysterina | Sphaerolaimoidea | Xyalidae | NA | Theristus | Theristus_agilis | Xyalidae |
| nm_3_6_9 | Nematoda | Chromadorea | Chromadoria | Monhysterida | Monhysterina | Sphaerolaimoidea | Xyalidae | NA | Theristus | Theristus_agilis | Xyalidae |
| nm_4_6_10 | Nematoda | Chromadorea | Chromadoria | Monhysterida | Monhysterina | Sphaerolaimoidea | Xyalidae | NA | Theristus | Theristus_agilis | Xyalidae |
| nm_2_7_4 | Nematoda | Chromadorea | Chromadoria | Plectida | Plectida incertae sedis | NA | Aegialoalaimidae | NA | Aegialoalaimus | unclassified_Aegialoalaimus | Aegialoalaimidae |
| nm_1_4_9 | Nematoda | Chromadorea | Chromadoria | Plectida | Plectida incertae sedis | NA | Aegialoalaimidae | NA | Aegialoalaimus | unclassified_Aegialoalaimus | Aegialoalaimidae |
| nm_3_4_6 | Nematoda | Chromadorea | Chromadoria | Plectida | Plectida incertae sedis | NA | Aegialoalaimidae | NA | Aegialoalaimus | unclassified_Aegialoalaimus | Aegialoalaimidae |
| nm_2_1_8 | Nematoda | Chromadorea | Chromadoria | Plectida | Ceramonematina | Ceramonematoidea | Ceramonematidae | Ceramonematinae | Ceramonema |  | Ceramonematidae |
| nm_2_1_11 | Nematoda | Chromadorea | Chromadoria | Plectida | Ceramonematina | Ceramonematoidea | Diplopeltoididae | NA | Diplopeltoides | unclassified_Diplopeltoides | Diplopeltoididae |
| nm_2_1_9 | Nematoda | Chromadorea | Chromadoria | Plectida | Ceramonematina | Ceramonematoidea | Diplopeltoididae | NA | Diplopeltoides | unclassified_Diplopeltoides | Diplopeltoididae |
| nm_2_4_5 | Nematoda | Enoplea | Enoplea_X | Enoplea_XX | Enoplea_XXX | Enoplea_XXXX | Enoplea_XXXXX | NA | NA | NA | Unident_Enoplea |
| nm_4_6_5 | Nematoda | Enoplea | Enoplia | Enoplia_X | Enoplia_XX | Enoplia_XXX | Enoplia_XXXX | NA | NA | NA | Unident_Enoplia |
| nm_4_6_6 | Nematoda | Enoplea | Enoplia | Enoplia_X | Enoplia_XX | Enoplia_XXX | Enoplia_XXXX | NA | NA | NA | Unident_Enoplia |
| nm_1_4_7 | Nematoda | Enoplea | Enoplia | Enoplida | Enoplina | Enoploidea | Enoploidea_X | NA | NA | NA | Unident_Enoploidea |
| nm_3_6_4 | Nematoda | Enoplea | Enoplia | Enoplida | Enoplina | Enoploidea | Enoploidea_X | NA | NA | NA | Unident_Enoploidea |
| nm_4_6_2 | Nematoda | Enoplea | Enoplia | Enoplida | Enoplina | Enoploidea | Enoplidae | Enoplinae | Enoplus | NA | Enoplidae |
| nm_4_6_3 | Nematoda | Enoplea | Enoplia | Enoplida | Enoplina | Enoploidea | Enoplidae | Enoplinae | Enoplus | NA | Enoplidae |
| nm_1_1_3 | Nematoda | Enoplea | Enoplia | Enoplida | Ironina | Ironoidea | Oxystominidae | Halalaiminae | Halalaimus | unclassified_Halalaimus | Oxystominidae |
| nm_1_4_3 | Nematoda | Enoplea | Enoplia | Enoplida | Ironina | Ironoidea | Oxystominidae | Halalaiminae | Halalaimus | unclassified_Halalaimus | Oxystominidae |
| nm_1_4_8 | Nematoda | Enoplea | Enoplia | Enoplida | Ironina | Ironoidea | Oxystominidae | Halalaiminae | Halalaimus | unclassified_Halalaimus | Oxystominidae |
| nm_3_6_10 | Nematoda | Enoplea | Enoplia | Enoplida | Ironina | Ironoidea | Oxystominidae | Halalaiminae | Halalaimus | unclassified_Halalaimus | Oxystominidae |
| nm_3_6_8 | Nematoda | Enoplea | Enoplia | Enoplida | Ironina | Ironoidea | Oxystominidae | Halalaiminae | Halalaimus | unclassified_Halalaimus | Oxystominidae |
| nm_1_6_6 | Nematoda | Enoplea | Enoplia | Enoplida | Ironina | Ironoidea | Oxystominidae | Halalaiminae | Halalaimus | unclassified_Halalaimus | Oxystominidae |
| nm_3_1_6 | Nematoda | Enoplea | Enoplia | Enoplida | Ironina | Ironoidea | Oxystominidae | Halalaiminae | Halalaimus | unclassified_Halalaimus | Oxystominidae |
| nm_2_6_2 | Nematoda | Enoplea | Enoplia | Enoplida | Ironina | Ironoidea | Oxystominidae | Halalaiminae | Halalaimus | unclassified_Halalaimus | Oxystominidae |
| nm_1_4_5 | Nematoda | Enoplea | Enoplia | Enoplida | Ironina | Ironoidea | Oxystominidae | Halalaiminae | Halalaimus | unclassified_Halalaimus | Oxystominidae |
| nm_1_4_6 | Nematoda | Enoplea | Enoplia | Enoplida | Ironina | Ironoidea | Oxystominidae | Halalaiminae | Halalaimus | unclassified_Halalaimus | Oxystominidae |
| nm_1_4_10 | Nematoda | Enoplea | Enoplia | Enoplida | Ironina | Ironoidea | Oxystominidae | Oxystomininae | Litinium | unclassified_Litinium | Oxystominidae |
| nm_1_4_4 | Nematoda | Enoplea | Enoplia | Enoplida | Ironina | Ironoidea | Oxystominidae | Oxystomininae | Oxystomina | unclassified_Oxystomina | Oxystominidae |
| nm_4_4_1 | Nematoda | Enoplea | Enoplia | Enoplida | Ironina | Ironoidea | Oxystominidae | Oxystomininae | Oxystomina | unclassified_Oxystomina | Oxystominidae |
| nm_3_7_9 | Nematoda | Enoplea | Enoplia | Enoplida | Oncholaimina | Oncholaimoidea | Oncholaimoidea_X | NA | NA | NA | Unident_Oncholaimoidea |
| nm_4_6_4 | Nematoda | Enoplea | Enoplia | Enoplida | Oncholaimina | Oncholaimoidea | Enchelidiidae | NA | Bathyeurystomina | unclassified_Bathyeurystomina | Enchelidiidae |
| nm_3_6_7 | Nematoda | Enoplea | Enoplia | Enoplida | Oncholaimina | Oncholaimoidea | Enchelidiidae | NA | Bathyeurystomina | unclassified_Bathyeurystomina | Enchelidiidae |
| nm_1_1_4 | Nematoda | Enoplea | Enoplia | Enoplida | Oncholaimina | Oncholaimoidea | Oncholaimidae | NA | NA | NA | Oncholaimidae |
| nm_4_4_5 | Nematoda | Enoplea | Enoplia | Enoplida | Oncholaimina | Oncholaimoidea | Oncholaimidae | NA | NA | NA | Oncholaimidae |
| nm_3_6_2 | Nematoda | Enoplea | Enoplia | Triplonchida | Tobrilina | Tobriloidea | Rhabdodemaniidae | NA | Rhabdodemania | unclassified_Rhabdodemania | Rhabdodemaniidae |
| nm_1_6_11 | Nematoda | Enoplea | Enoplia | Triplonchida | Tobrilina | Tobriloidea | Rhabdodemaniidae | NA | NA | NA | Rhabdodemaniidae |
| nm_2_4_6 | Nematoda | Enoplea | Enoplia | Triplonchida | Tobrilina | Tobriloidea | Rhabdodemaniidae | NA | NA | NA | Rhabdodemaniidae |
| nm_2_7_1 | Nematoda | Enoplea | Enoplia | Triplonchida | Tobrilina | Tobriloidea | Rhabdodemaniidae | NA | NA | NA | Rhabdodemaniidae |
| nm_2_7_10 | Nematoda | Enoplea | Enoplia | Triplonchida | Tobrilina | Tobriloidea | Rhabdodemaniidae | NA | NA | NA | Rhabdodemaniidae |
| nm_2_7_2 | Nematoda | Enoplea | Enoplia | Triplonchida | Tobrilina | Tobriloidea | Rhabdodemaniidae | NA | NA | NA | Rhabdodemaniidae |
| nm_3_7_10 | Nematoda | Enoplea | Enoplia | Triplonchida | Tobrilina | Tobriloidea | Rhabdodemaniidae | NA | NA | NA | Rhabdodemaniidae |
| nm_3_7_3 | Nematoda | Enoplea | Enoplia | Triplonchida | Tobrilina | Tobriloidea | Rhabdodemaniidae | NA | NA | NA | Rhabdodemaniidae |
| nm_3_7_6 | Nematoda | Enoplea | Enoplia | Triplonchida | Tobrilina | Tobriloidea | Rhabdodemaniidae | NA | NA | NA | Rhabdodemaniidae |

Table S3: Average relative abundance (± Standard Error of the Mean) of all prey classes across all nematode samples (All), and across season (Aug = August, Dec = December, Mar = March, May = May) and stations sampled (Shelf S = Shelf South, Shelf N = Shelf North, Break = Shelf Break, Basin = Nansen Basin).

| **Subdivision** | **Class** | **All±SE** | **Aug±SE** | **Dec±SE** | **Mar±SE** | **May±SE** | **ShelfS±SE** | **ShelfN±SE** | **Break±SE** | **Basin±SE** |
| --- | --- | --- | --- | --- | --- | --- | --- | --- | --- | --- |
| Fungi | Ascomycota | 23.3±1.9 | 15.3±3 | 19±3.6 | 26.7±3.1 | 30.9±4.2 | 21.2±3.7 | 22.3±3.2 | 25.5±3.5 | 23.9±5.5 |
| Metazoa | Arthropoda | 22.6±1.6 | 30.4±3.4 | 28.2±3.7 | 20.6±3.5 | 13.3±1.6 | 17.9±2.3 | 24.6±3 | 22.6±3.1 | 25.4±4.9 |
| Fungi | Basidiomycota | 11.6±1.2 | 8.2±1.4 | 9.2±3.5 | 12.6±1.9 | 15.3±2.9 | 15.2±3.3 | 11.9±1.9 | 11±2.2 | 6.7±1.6 |
| Ciliophora | Oligohymenophorea | 7.7±1 | 5.8±1.2 | 4.1±1.2 | 10.8±3 | 9.2±1.6 | 9.1±1.4 | 6.3±1.4 | 7.8±2.4 | 8.5±2.1 |
| Metazoa | Craniata | 7.4±0.9 | 7.3±1.5 | 7.1±1.8 | 8.2±1.8 | 6.9±1.9 | 7.8±1.8 | 7±1.5 | 5.3±1.1 | 11.4±3.4 |
| Metazoa | Annelida | 7.3±1.1 | 9.8±2.6 | 10.4±3.7 | 5.4±1.9 | 4.5±0.8 | 4.4±1.1 | 8±2 | 8.8±2.2 | 7±3.7 |
| Chlorophyta_X | Trebouxiophyceae | 3.8±0.7 | 6±1.8 | 3.7±0.8 | 1.8±0.4 | 3.2±1 | 3.8±1.7 | 3.3±0.6 | 3.3±1.1 | 5.9±2.4 |
| Metazoa | Mollusca | 2.7±0.3 | 3±0.6 | 2.5±0.7 | 1.9±0.7 | 3.3±0.6 | 3.2±0.8 | 3.1±0.6 | 2.3±0.5 | 2.3±0.6 |
| Dinoflagellata | Dinophyceae | 2.4±0.5 | 3.4±1.4 | 2±0.8 | 1.9±0.3 | 1.9±0.3 | 4.1±1.8 | 1.6±0.2 | 2.2±0.6 | 1.5±0.4 |
| Fungi | Mucoromycota | 1.4±0.4 | 0.5±0.2 | 0.1±0.1 | 2.8±1.5 | 1.9±0.8 | 1.3±0.3 | 2.5±1.4 | 0.6±0.2 | 0.8±0.2 |
| Metazoa | Bryozoa | 1±0.4 | 0.3±0.1 | 0.6±0.4 | 0.8±0.1 | 2.1±1.2 | 0.9±0.1 | 1.7±1.2 | 0.7±0.2 | 0.6±0.2 |
| Metazoa | Nemertea | 0.8±0.4 | 1±0.7 | 2.9±2.5 | 0.1±0 | 0.1±0.1 | 0±0 | 1±0.7 | 1.4±1.2 | 0.2±0.1 |
| Fungi | Chytridiomycota | 0.8±0.5 | 1.8±1.4 | 0.6±0.4 | 0.2±0 | 0.4±0.1 | 2.3±1.9 | 0.6±0.3 | 0.2±0 | 0.3±0.1 |
| Ciliophora | Spirotrichea | 0.7±0.2 | 1.2±0.7 | 0.2±0 | 0.4±0.1 | 0.6±0.2 | 1.6±0.9 | 0.2±0 | 0.5±0.2 | 0.6±0.3 |
| Metazoa | Platyhelminthes | 0.6±0.1 | 0.9±0.2 | 0.8±0.2 | 0.2±0 | 0.5±0.1 | 0.7±0.3 | 0.5±0.1 | 0.6±0.2 | 0.6±0.2 |
| Dinoflagellata | Syndiniales | 0.5±0.3 | 0.3±0.1 | 1.9±1.6 | 0±0 | 0.6±0.4 | 0.7±0.6 | 0.2±0.1 | 1±0.8 | 0.1±0 |
| Picozoa_X | Picozoa_XX | 0.5±0.1 | 0.6±0.1 | 1.4±0.4 | 0.4±0.3 | 0.1±0 | 0.5±0.3 | 0.7±0.2 | 0.5±0.2 | 0.3±0.1 |
| Cercozoa | Filosa-Sarcomonadea | 0.5±0.1 | 0.3±0.2 | 0.2±0.2 | 0.5±0.1 | 0.8±0.3 | 0.5±0.1 | 0.7±0.3 | 0.4±0.1 | 0.3±0.1 |
| Gyrista | Mediophyceae | 0.4±0.1 | 0.6±0.2 | 1.2±0.7 | 0±0 | 0.1±0 | 0.4±0.3 | 0.2±0 | 0.7±0.3 | 0.2±0.1 |
| Haptophyta_X | Prymnesiophyceae | 0.3±0.1 | 0.1±0 | 0±0 | 1±0.6 | 0.1±0 | 0.4±0.3 | 0.1±0 | 0.5±0.4 | 0.1±0 |
| Gyrista | Chrysophyceae | 0.3±0.1 | 0.1±0.1 | 0.7±0.6 | 0.2±0.1 | 0.3±0.1 | 0.2±0.2 | 0.1±0.1 | 0.5±0.3 | 0.1±0 |
| Metazoa | Cnidaria | 0.2±0.1 | 0.2±0.1 | 0±0 | 0.4±0.1 | 0.3±0.2 | 0.2±0.1 | 0.4±0.2 | 0.2±0.1 | 0.1±0 |
| Metazoa | Porifera | 0.2±0.1 | 0±0 | 0±0 | 0.4±0.4 | 0.4±0.4 | 0.5±0.5 | 0±0 | 0.3±0.3 | 0±0 |
| Metazoa | Urochordata | 0.2±0.1 | 0.1±0 | 0.1±0 | 0.1±0 | 0.5±0.3 | 0.5±0.3 | 0.1±0 | 0.1±0 | 0.3±0.2 |
| Filasterea | Filasterea_X | 0.2±0.1 | 0±0 | 0±0 | 0.1±0 | 0.6±0.5 | 0.1±0 | 0±0 | 0.1±0 | 1±0.9 |
| Bigyra | Sagenista | 0.2±0.1 | 0.5±0.2 | 0.2±0 | 0.1±0 | 0±0 | 0±0 | 0.2±0 | 0.4±0.2 | 0.1±0 |
| Metazoa | Priapulida | 0.2±0.1 | 0.3±0.1 | 0.1±0 | 0.2±0.1 | 0.1±0.1 | 0.3±0.1 | 0.3±0.1 | 0.1±0 | 0.1±0.1 |
| Kathablepharida | Kathablepharidea | 0.2±0.1 | 0.1±0 | 0±0 | 0.2±0.2 | 0.4±0.2 | 0.1±0.1 | 0.1±0.1 | 0.3±0.2 | 0±0 |
| Telonemia_X | Telonemia_XX | 0.2±0 | 0.3±0.1 | 0.1±0 | 0.2±0.2 | 0.1±0 | 0±0 | 0.2±0.1 | 0.3±0.1 | 0.1±0 |
| Metazoa | Hemichordata | 0.2±0 | 0.1±0 | 0±0 | 0.2±0.1 | 0.3±0.1 | 0.4±0.1 | 0.1±0 | 0.1±0 | 0.1±0 |
| Metazoa | Echinodermata | 0.2±0.1 | 0±0 | 0.6±0.6 | 0.2±0.2 | 0±0 | 0±0 | 0.3±0.3 | 0.2±0.1 | 0±0 |
| Metazoa | Brachiopoda | 0.1±0 | 0.1±0 | 0.3±0.2 | 0.1±0 | 0.2±0.1 | 0.1±0 | 0.1±0 | 0.2±0.1 | 0.3±0.1 |
| Metazoa | Cephalochordata | 0.1±0.1 | 0±0 | 0±0 | 0±0 | 0.4±0.2 | 0.2±0.2 | 0±0 | 0±0 | 0.4±0.4 |
| Chlorophyta_X | Mamiellophyceae | 0.1±0.1 | 0.2±0.1 | 0.2±0.1 | 0±0 | 0±0 | 0.1±0.1 | 0±0 | 0.2±0.2 | 0.1±0 |
| Discosea_X | Flabellinia | 0.1±0.1 | 0.3±0.3 | 0±0 | 0±0 | 0.1±0 | 0.4±0.4 | 0±0 | 0±0 | 0±0 |
| Gyrista | Gyrista_X | 0.1±0 | 0.1±0 | 0.3±0.2 | 0±0 | 0±0 | 0.1±0.1 | 0.2±0.1 | 0.1±0 | 0.1±0 |
| Cryptophyta_X | Cryptophyceae | 0.1±0 | 0.2±0.1 | 0.1±0 | 0.1±0.1 | 0±0 | 0±0 | 0.1±0 | 0.2±0.1 | 0.1±0 |
| Metazoa | Rotifera | 0.1±0 | 0.1±0.1 | 0.2±0.1 | 0.1±0.1 | 0±0 | 0.1±0 | 0.1±0 | 0.2±0.1 | 0.1±0 |
| Apicomplexa | Coccidiomorphea | 0.1±0.1 | 0±0 | 0±0 | 0.4±0.4 | 0±0 | 0±0 | 0.3±0.3 | 0±0 | 0±0 |
| Metazoa | Chaetognatha | 0.1±0 | 0±0 | 0.1±0.1 | 0.2±0 | 0.1±0 | 0.2±0 | 0.1±0 | 0.1±0 | 0.1±0 |
| Metazoa | Tardigrada | 0.1±0 | 0±0 | 0.4±0.2 | 0±0 | 0±0 | 0±0 | 0.2±0.1 | 0±0 | 0±0 |
| Chlorophyta_X | Chlorophyceae | 0.1±0 | 0.1±0.1 | 0±0 | 0±0 | 0±0 | 0.1±0.1 | 0.1±0 | 0±0 | 0±0 |
| Gyrista | Phaeophyceae | 0.1±0 | 0±0 | 0±0 | 0±0 | 0.2±0.2 | 0±0 | 0±0 | 0.1±0.1 | 0±0 |
| Gyrista | Dictyochophyceae | 0.1±0 | 0.2±0.1 | 0.1±0 | 0±0 | 0±0 | 0±0 | 0.1±0 | 0.1±0.1 | 0.1±0 |
| Metazoa | Entoprocta | 0.1±0 | 0±0 | 0±0 | 0.1±0 | 0.1±0 | 0.1±0 | 0.1±0 | 0±0 | 0.1±0 |
| Discoba_X | Discoba_XX | 0±0 | 0.1±0.1 | 0±0 | 0±0 | 0±0 | 0.2±0.1 | 0±0 | 0±0 | 0±0 |
| Chlorophyta_X | Chloropicophyceae | 0±0 | 0±0 | 0±0 | 0.1±0.1 | 0±0 | 0.1±0.1 | 0±0 | 0±0 | 0±0 |
| Bigyra | Opalozoa | 0±0 | 0±0 | 0±0 | 0.1±0.1 | 0±0 | 0±0 | 0.1±0.1 | 0±0 | 0±0 |
| Choanoflagellata | Choanoflagellatea | 0±0 | 0.1±0 | 0±0 | 0±0 | 0±0 | 0±0 | 0±0 | 0.1±0 | 0±0 |
| Gyrista | Peronosporomycetes | 0±0 | 0±0 | 0±0 | 0.1±0.1 | 0±0 | 0±0 | 0.1±0 | 0±0 | 0±0 |
| Metazoa | Kinorhyncha | 0±0 | 0±0 | 0±0 | 0±0 | 0±0 | 0±0 | 0±0 | 0±0 | 0±0 |
| Cercozoa | Filosa-Thecofilosea | 0±0 | 0±0 | 0±0 | 0±0 | 0±0 | 0±0 | 0±0 | 0±0 | 0±0 |
| Gyrista | Bacillariophyceae | 0±0 | 0±0 | 0±0 | 0±0 | 0±0 | 0±0 | 0±0 | 0±0 | 0±0 |
| Prasinodermophyta_X | Prasinodermophyceae | 0±0 | 0±0 | 0±0 | 0±0 | 0±0 | 0±0 | 0±0 | 0±0 | 0±0 |
| Ichthyosporea | Ichthyophonida | 0±0 | 0±0 | 0±0 | 0±0 | 0±0 | 0±0 | 0±0 | 0±0 | 0±0 |
| Chlorophyta_X | Pyramimonadophyceae | 0±0 | 0±0 | 0±0 | 0±0 | 0±0 | 0±0 | 0±0 | 0±0 | 0±0 |
| Metazoa | Gastrotricha | 0±0 | 0±0 | 0±0 | 0±0 | 0±0 | 0±0 | 0±0 | 0±0 | 0±0 |
| Gyrista | Bolidophyceae | 0±0 | 0±0 | 0±0 | 0±0 | 0±0 | 0±0 | 0±0 | 0±0 | 0±0 |
| Ciliophora | Prostomatea | 0±0 | 0±0 | 0±0 | 0±0 | 0±0 | 0±0 | 0±0 | 0±0 | 0±0 |
| Gyrista | Xanthophyceae | 0±0 | 0±0 | 0±0 | 0±0 | 0±0 | 0±0 | 0±0 | 0±0 | 0±0 |
| Fungi | Fungi_X | 0±0 | 0±0 | 0±0 | 0±0 | 0±0 | 0±0 | 0±0 | 0±0 | 0±0 |
| Gyrista | Pelagophyceae | 0±0 | 0±0 | 0±0 | 0±0 | 0±0 | 0±0 | 0±0 | 0±0 | 0±0 |
| Ancyromonadida_X | Ancyromonadida_XX | 0±0 | 0±0 | 0±0 | 0±0 | 0±0 | 0±0 | 0±0 | 0±0 | 0±0 |
| Haptophyta_X | Haptophyta_XX | 0±0 | 0±0 | 0±0 | 0±0 | 0±0 | 0±0 | 0±0 | 0±0 | 0±0 |
| Perkinsea | Perkinsida | 0±0 | 0±0 | 0±0 | 0±0 | 0±0 | 0±0 | 0±0 | 0±0 | 0±0 |
| Metazoa | Placozoa | 0±0 | 0±0 | 0±0 | 0±0 | 0±0 | 0±0 | 0±0 | 0±0 | 0±0 |
| Metazoa | Micrognathozoa | 0±0 | 0±0 | 0±0 | 0±0 | 0±0 | 0±0 | 0±0 | 0±0 | 0±0 |
| Chrompodellids | Colpodellidea | 0±0 | 0±0 | 0±0 | 0±0 | 0±0 | 0±0 | 0±0 | 0±0 | 0±0 |
| Cercozoa | Endomyxa | 0±0 | 0±0 | 0±0 | 0±0 | 0±0 | 0±0 | 0±0 | 0±0 | 0±0 |
| Cercozoa | Filosa-Imbricatea | 0±0 | 0±0 | 0±0 | 0±0 | 0±0 | 0±0 | 0±0 | 0±0 | 0±0 |
| Metazoa | Gnathostomulida | 0±0 | 0±0 | 0±0 | 0±0 | 0±0 | 0±0 | 0±0 | 0±0 | 0±0 |
| Streptophyta_X | Zygnemophyceae | 0±0 | 0±0 | 0±0 | 0±0 | 0±0 | 0±0 | 0±0 | 0±0 | 0±0 |
| Metazoa | Acanthocephala | 0±0 | 0±0 | 0±0 | 0±0 | 0±0 | 0±0 | 0±0 | 0±0 | 0±0 |
| Cercozoa | Chlorarachniophyceae | 0±0 | 0±0 | 0±0 | 0±0 | 0±0 | 0±0 | 0±0 | 0±0 | 0±0 |
| Haptophyta_X | Rappephyceae | 0±0 | 0±0 | 0±0 | 0±0 | 0±0 | 0±0 | 0±0 | 0±0 | 0±0 |
| Dinoflagellata | Noctilucophyceae | 0±0 | 0±0 | 0±0 | 0±0 | 0±0 | 0±0 | 0±0 | 0±0 | 0±0 |
| Metazoa | Myxozoa | 0±0 | 0±0 | 0±0 | 0±0 | 0±0 | 0±0 | 0±0 | 0±0 | 0±0 |
| Metazoa | Myzostomida | 0±0 | 0±0 | 0±0 | 0±0 | 0±0 | 0±0 | 0±0 | 0±0 | 0±0 |
| Chlorophyta_X | Ulvophyceae | 0±0 | 0±0 | 0±0 | 0±0 | 0±0 | 0±0 | 0±0 | 0±0 | 0±0 |
| Chlorophyta_X | Chlorophyta_XX | 0±0 | 0±0 | 0±0 | 0±0 | 0±0 | 0±0 | 0±0 | 0±0 | 0±0 |
| Bigyra | Bicoecea | 0±0 | 0±0 | 0±0 | 0±0 | 0±0 | 0±0 | 0±0 | 0±0 | 0±0 |
| Ciliophora | Litostomatea | 0±0 | 0±0 | 0±0 | 0±0 | 0±0 | 0±0 | 0±0 | 0±0 | 0±0 |
| Tubulinea_X | Elardia | 0±0 | 0±0 | 0±0 | 0±0 | 0±0 | 0±0 | 0±0 | 0±0 | 0±0 |
| Cercozoa | Endomyxa-Ascetosporea | 0±0 | 0±0 | 0±0 | 0±0 | 0±0 | 0±0 | 0±0 | 0±0 | 0±0 |
| Ciliophora | Heterotrichea | 0±0 | 0±0 | 0±0 | 0±0 | 0±0 | 0±0 | 0±0 | 0±0 | 0±0 |
| Nebulidia_X | Nebulidea | 0±0 | 0±0 | 0±0 | 0±0 | 0±0 | 0±0 | 0±0 | 0±0 | 0±0 |
| Fungi | Blastocladiomycota | 0±0 | 0±0 | 0±0 | 0±0 | 0±0 | 0±0 | 0±0 | 0±0 | 0±0 |
| Ciliophora | Phyllopharyngea | 0±0 | 0±0 | 0±0 | 0±0 | 0±0 | 0±0 | 0±0 | 0±0 | 0±0 |
| Fungi | Rozellomycota | 0±0 | 0±0 | 0±0 | 0±0 | 0±0 | 0±0 | 0±0 | 0±0 | 0±0 |
| Radiolaria | Acantharea | 0±0 | 0±0 | 0±0 | 0±0 | 0±0 | 0±0 | 0±0 | 0±0 | 0±0 |
| Rhodophyta_X | Porphyridiophyceae | 0±0 | 0±0 | 0±0 | 0±0 | 0±0 | 0±0 | 0±0 | 0±0 | 0±0 |
| Streptophyta_X | Charophyceae | 0±0 | 0±0 | 0±0 | 0±0 | 0±0 | 0±0 | 0±0 | 0±0 | 0±0 |
| Centroplasthelida_X | Pterocystida | 0±0 | 0±0 | 0±0 | 0±0 | 0±0 | 0±0 | 0±0 | 0±0 | 0±0 |
| Rhodophyta_X | Stylonematophyceae | 0±0 | 0±0 | 0±0 | 0±0 | 0±0 | 0±0 | 0±0 | 0±0 | 0±0 |
| Stramenopiles_X | Stramenopiles_XX | 0±0 | 0±0 | 0±0 | 0±0 | 0±0 | 0±0 | 0±0 | 0±0 | 0±0 |
| Ciliophora | Armophorea | 0±0 | 0±0 | 0±0 | 0±0 | 0±0 | 0±0 | 0±0 | 0±0 | 0±0 |
| Streptophyta_X | Coleochaetophyceae | 0±0 | 0±0 | 0±0 | 0±0 | 0±0 | 0±0 | 0±0 | 0±0 | 0±0 |
| Haptophyta_X | Haptophyta_Clade_HAP2 | 0±0 | 0±0 | 0±0 | 0±0 | 0±0 | 0±0 | 0±0 | 0±0 | 0±0 |
| Chlorophyta_X | Chlorodendrophyceae | 0±0 | 0±0 | 0±0 | 0±0 | 0±0 | 0±0 | 0±0 | 0±0 | 0±0 |
| Apusomonada_X | Apusomonadidae | 0±0 | 0±0 | 0±0 | 0±0 | 0±0 | 0±0 | 0±0 | 0±0 | 0±0 |
| Hemimastigophora_X | Hemimastigophora_XX | 0±0 | 0±0 | 0±0 | 0±0 | 0±0 | 0±0 | 0±0 | 0±0 | 0±0 |
| Breviatea_X | Breviatea_XX | 0±0 | 0±0 | 0±0 | 0±0 | 0±0 | 0±0 | 0±0 | 0±0 | 0±0 |
| Apicomplexa | Gregarinomorphea | 0±0 | 0±0 | 0±0 | 0±0 | 0±0 | 0±0 | 0±0 | 0±0 | 0±0 |
| Radiolaria | Polycystinea | 0±0 | 0±0 | 0±0 | 0±0 | 0±0 | 0±0 | 0±0 | 0±0 | 0±0 |
| Streptophyta_X | Mesostigmatophyceae | 0±0 | 0±0 | 0±0 | 0±0 | 0±0 | 0±0 | 0±0 | 0±0 | 0±0 |
| Dinoflagellata | Dinophyta_X | 0±0 | 0±0 | 0±0 | 0±0 | 0±0 | 0±0 | 0±0 | 0±0 | 0±0 |
| Ichthyosporea | Dermocystida | 0±0 | 0±0 | 0±0 | 0±0 | 0±0 | 0±0 | 0±0 | 0±0 | 0±0 |
| Gyrista | Raphidophyceae | 0±0 | 0±0 | 0±0 | 0±0 | 0±0 | 0±0 | 0±0 | 0±0 | 0±0 |
| Haptophyta_X | Haptophyta_Clade_HAP4 | 0±0 | 0±0 | 0±0 | 0±0 | 0±0 | 0±0 | 0±0 | 0±0 | 0±0 |
| Cercozoa | Filosa-Granofilosea | 0±0 | 0±0 | 0±0 | 0±0 | 0±0 | 0±0 | 0±0 | 0±0 | 0±0 |
| Radiolaria | RAD-B | 0±0 | 0±0 | 0±0 | 0±0 | 0±0 | 0±0 | 0±0 | 0±0 | 0±0 |
| Rhodophyta_X | Rhodellophyceae | 0±0 | 0±0 | 0±0 | 0±0 | 0±0 | 0±0 | 0±0 | 0±0 | 0±0 |
| Gyrista | Eustigmatophyceae | 0±0 | 0±0 | 0±0 | 0±0 | 0±0 | 0±0 | 0±0 | 0±0 | 0±0 |
| Metazoa | Ctenophora | 0±0 | 0±0 | 0±0 | 0±0 | 0±0 | 0±0 | 0±0 | 0±0 | 0±0 |
| Centroplasthelida_X | Centroplasthelida_XX | 0±0 | 0±0 | 0±0 | 0±0 | 0±0 | 0±0 | 0±0 | 0±0 | 0±0 |
| Haptophyta_X | Pavlovophyceae | 0±0 | 0±0 | 0±0 | 0±0 | 0±0 | 0±0 | 0±0 | 0±0 | 0±0 |
| Ciliophora | Colpodea | 0±0 | 0±0 | 0±0 | 0±0 | 0±0 | 0±0 | 0±0 | 0±0 | 0±0 |
| Preaxostyla | Preaxostyla_X | 0±0 | 0±0 | 0±0 | 0±0 | 0±0 | 0±0 | 0±0 | 0±0 | 0±0 |
| Discoba_X | Heterolobosea | 0±0 | 0±0 | 0±0 | 0±0 | 0±0 | 0±0 | 0±0 | 0±0 | 0±0 |
| Centroplasthelida_X | Panacanthocystida | 0±0 | 0±0 | 0±0 | 0±0 | 0±0 | 0±0 | 0±0 | 0±0 | 0±0 |
| Streptophyta_X | Streptophyta_XX | 0±0 | 0±0 | 0±0 | 0±0 | 0±0 | 0±0 | 0±0 | 0±0 | 0±0 |
| Fungi | Zoopagomycota | 0±0 | 0±0 | 0±0 | 0±0 | 0±0 | 0±0 | 0±0 | 0±0 | 0±0 |
| Metazoa | Nematomorpha | 0±0 | 0±0 | 0±0 | 0±0 | 0±0 | 0±0 | 0±0 | 0±0 | 0±0 |
| Cercozoa | Novel-clade-10-12 | 0±0 | 0±0 | 0±0 | 0±0 | 0±0 | 0±0 | 0±0 | 0±0 | 0±0 |
| Chlorophyta_X | Nephroselmidophyceae | 0±0 | 0±0 | 0±0 | 0±0 | 0±0 | 0±0 | 0±0 | 0±0 | 0±0 |
| Cercozoa | Phaeodarea | 0±0 | 0±0 | 0±0 | 0±0 | 0±0 | 0±0 | 0±0 | 0±0 | 0±0 |
| Ciliophora | Plagiopylea | 0±0 | 0±0 | 0±0 | 0±0 | 0±0 | 0±0 | 0±0 | 0±0 | 0±0 |
| Ciliophora | CONThreeP | 0±0 | 0±0 | 0±0 | 0±0 | 0±0 | 0±0 | 0±0 | 0±0 | 0±0 |
| Glaucophyta_X | Glaucocystophyceae | 0±0 | 0±0 | 0±0 | 0±0 | 0±0 | 0±0 | 0±0 | 0±0 | 0±0 |

Table S4: Average relative abundance (± Standard Error of the Mean) of all prey families across all nematode samples (All), and across season (Aug = August, Dec = December, Mar = March, May = May) and stations sampled (Shelf S = Shelf South, Shelf N = Shelf North, Break = Shelf Break, Basin = Nansen Basin).

| **Subdivision** | **Class** | **Family** | **All±SE** | **Aug±SE** | **Dec±SE** | **Mar±SE** | **May±SE** | **ShelfS±SE** | **ShelfN±SE** | **Break±SE** | **Basin±SE** |
| --- | --- | --- | --- | --- | --- | --- | --- | --- | --- | --- | --- |
| Fungi | Ascomycota | Dothideomycetes | 9.6±1.2 | 5.5±1.5 | 7.3±2.5 | 13.5±2.4 | 11.8±2.7 | 9.6±2.4 | 12.4±2.7 | 7.7±1.7 | 7.5±2.6 |
| Ciliophora | Oligohymenophorea | Sessilida | 7.7±1 | 5.8±1.2 | 4.1±1.2 | 10.7±3 | 9.2±1.6 | 9.1±1.4 | 6.3±1.4 | 7.8±2.4 | 8.4±2.1 |
| Metazoa | Arthropoda | Maxillopoda | 19.4±1.6 | 27.2±3.4 | 26.1±3.7 | 18.5±3.4 | 8.8±1.1 | 14.7±2.2 | 22.5±3 | 19.7±3.1 | 19.3±4.7 |
| Chlorophyta_X | Trebouxiophyceae | Chlorellales_X | 3.8±0.7 | 6±1.8 | 3.7±0.8 | 1.6±0.4 | 3.2±1 | 3.8±1.7 | 3.2±0.6 | 3.3±1.1 | 5.9±2.4 |
| Metazoa | Craniata | Teleostei | 5.9±0.9 | 6.9±1.5 | 6.1±1.5 | 6±1.8 | 4.6±1.8 | 5.6±1.7 | 5.9±1.5 | 4.3±1.1 | 9.3±3.3 |
| Fungi | Ascomycota | Sordariomycetes | 5.9±1.2 | 4.2±2 | 2.1±0.6 | 4.1±1.4 | 10.9±3.2 | 3.1±1.4 | 4.2±1.3 | 6.4±2.4 | 12.5±5.3 |
| Fungi | Basidiomycota | Cystobasidiomycetes | 3.2±0.6 | 2.6±0.7 | 1.3±0.4 | 3.2±0.9 | 4.7±1.8 | 2.2±0.8 | 4.5±1.4 | 3.5±1.3 | 1.2±0.3 |
| Dinoflagellata | Dinophyceae | Prorocentraceae | 1±0.1 | 1±0.3 | 0.4±0.1 | 1.2±0.3 | 1.2±0.2 | 1.8±0.5 | 0.7±0.1 | 0.8±0.2 | 0.8±0.2 |
| Fungi | Ascomycota | Leotiomycetes | 2.2±0.7 | 3±1.9 | 2.3±0.6 | 1.1±0.5 | 2±1.1 | 3.4±2.5 | 2.6±1.1 | 1.5±0.4 | 0.9±0.2 |
| Metazoa | Annelida | Annelida_XX | 7.2±1.1 | 9.8±2.6 | 10.4±3.7 | 5.2±1.9 | 4.5±0.8 | 4.4±1.1 | 7.9±2 | 8.8±2.2 | 7±3.7 |
| Fungi | Basidiomycota | Tremellomycetes | 3.2±0.6 | 3.1±0.9 | 5.2±3.5 | 3.4±0.9 | 2.1±0.5 | 3.2±1.2 | 2.4±0.5 | 4.6±1.8 | 2±0.5 |
| Picozoa_X | Picozoa_XX | Picozoa_XXXX | 0.5±0.1 | 0.6±0.1 | 1.4±0.4 | 0.4±0.3 | 0.1±0 | 0.5±0.3 | 0.7±0.2 | 0.5±0.2 | 0.3±0.1 |
| Metazoa | Bryozoa | Bryozoa_XX | 1±0.4 | 0.3±0.1 | 0.6±0.4 | 0.8±0.1 | 2.1±1.2 | 0.9±0.1 | 1.7±1.2 | 0.7±0.2 | 0.6±0.2 |
| Fungi | Mucoromycota | Glomerales | 1±0.4 | 0.4±0.2 | 0.1±0.1 | 2.7±1.5 | 1±0.2 | 1.3±0.3 | 1.6±1.2 | 0.5±0.2 | 0.6±0.2 |
| Fungi | Ascomycota | Eurotiomycetes | 2.9±0.7 | 1.3±0.4 | 4.6±2.5 | 5.1±2 | 2.2±0.8 | 3±1.3 | 1.3±0.3 | 5.4±1.9 | 1.1±0.3 |
| Cercozoa | Filosa-Sarcomonadea | Sandonidae | 0.5±0.1 | 0.3±0.2 | 0±0 | 0.5±0.1 | 0.8±0.3 | 0.5±0.1 | 0.7±0.3 | 0.3±0.1 | 0.3±0.1 |
| Dinoflagellata | Dinophyceae | Dinophyceae_XX | 0.6±0.1 | 0.5±0.2 | 1.1±0.8 | 0.5±0.1 | 0.5±0.1 | 0.4±0.1 | 0.5±0.1 | 0.9±0.4 | 0.4±0.1 |
| Fungi | Ascomycota | Pezizomycotina_X | 0.6±0.5 | 0±0 | 0±0 | 0.1±0 | 1.8±1.6 | 0.1±0 | 0.1±0 | 1.7±1.6 | 0.1±0 |
| Fungi | Basidiomycota | Agaricomycetes | 3.1±0.8 | 1.1±0.3 | 0.7±0.3 | 4±1.3 | 5.5±2.2 | 6.5±2.8 | 2.7±1 | 1.3±0.3 | 2.1±1.3 |
| Ciliophora | Spirotrichea | Strombidiidae | 0.4±0.1 | 0.4±0.2 | 0.1±0 | 0.3±0.1 | 0.5±0.2 | 0.6±0.2 | 0.1±0 | 0.3±0.1 | 0.5±0.3 |
| Metazoa | Craniata | Craniata_XX | 1.1±0.3 | 0.3±0 | 0.9±0.6 | 1.7±0.6 | 1.6±0.8 | 1.6±0.5 | 0.8±0.3 | 0.8±0.4 | 1.8±1.5 |
| Fungi | Ascomycota | Lecanoromycetes | 0.6±0.2 | 0.8±0.5 | 0.3±0.1 | 0.5±0.4 | 0.5±0.5 | 0.1±0 | 0.7±0.4 | 0.5±0.3 | 1.2±1 |
| Cryptophyta_X | Cryptophyceae | Cryptomonadales_X | 0.1±0 | 0.2±0.1 | 0.1±0 | 0±0 | 0±0 | 0±0 | 0.1±0 | 0.2±0.1 | 0.1±0 |
| Metazoa | Arthropoda | Malacostraca | 1.7±0.4 | 1.8±0.5 | 0.9±0.3 | 1.3±0.6 | 2.3±0.9 | 1.4±0.6 | 0.9±0.4 | 2.1±0.8 | 2.9±1 |
| Gyrista | Mediophyceae | Skeletonemaceae | 0.1±0 | 0.1±0 | 0.1±0 | 0±0 | 0±0 | 0±0 | 0.1±0 | 0.1±0 | 0.1±0 |
| Fungi | Basidiomycota | Exobasidiomycetes | 1.8±0.5 | 1.4±1 | 2±1.2 | 1.5±0.7 | 2.2±1.1 | 3.1±1.8 | 1.7±0.6 | 1.5±0.7 | 0.4±0.1 |
| Metazoa | Nemertea | Nemertea_XX | 0.8±0.4 | 1±0.7 | 2.9±2.5 | 0.1±0 | 0.1±0.1 | 0±0 | 1±0.7 | 1.4±1.2 | 0.1±0 |
| Bigyra | Sagenista | Amphifilaceae | 0.2±0.1 | 0.5±0.2 | 0.2±0 | 0.1±0 | 0±0 | 0±0 | 0.2±0 | 0.4±0.2 | 0.1±0 |
| Fungi | Mucoromycota | Mucoromycotina_X | 0.3±0.3 | 0±0 | 0±0 | 0±0 | 0.9±0.8 | 0±0 | 0.9±0.8 | 0±0 | 0±0 |
| Filasterea | Filasterea_X | Capsasporidae | 0.2±0.1 | 0±0 | 0±0 | 0.1±0 | 0.6±0.5 | 0.1±0 | 0±0 | 0.1±0 | 1±0.9 |
| Dinoflagellata | Dinophyceae | Torodiniaceae | 0±0 | 0.1±0.1 | 0±0 | 0±0 | 0±0 | 0±0 | 0±0 | 0.1±0 | 0±0 |
| Metazoa | Chaetognatha | Aphragmophora_X | 0.1±0 | 0±0 | 0.1±0.1 | 0.2±0 | 0.1±0 | 0.2±0 | 0.1±0 | 0.1±0 | 0.1±0 |
| Fungi | Ascomycota | Saccharomycetales | 1.4±0.3 | 0.4±0.1 | 2.3±1 | 2±0.8 | 1.5±0.7 | 1.6±0.6 | 0.9±0.3 | 2.3±0.8 | 0.5±0.2 |
| Gyrista | Gyrista_X | MAST-1 | 0.1±0 | 0.1±0 | 0.3±0.2 | 0±0 | 0±0 | 0.1±0.1 | 0.2±0.1 | 0.1±0 | 0.1±0 |
| Gyrista | Dictyochophyceae | Florenciellales | 0.1±0 | 0.1±0 | 0.1±0 | 0±0 | 0±0 | 0±0 | 0.1±0 | 0.1±0 | 0.1±0 |
| Dinoflagellata | Syndiniales | Dino-Group-II-Clade-6 | 0±0 | 0.1±0 | 0±0 | 0±0 | 0±0 | 0±0 | 0±0 | 0.1±0 | 0±0 |
| Metazoa | Cnidaria | Hydrozoa | 0.2±0.1 | 0.1±0.1 | 0±0 | 0.2±0.1 | 0.3±0.2 | 0.2±0.1 | 0.4±0.2 | 0.1±0 | 0.1±0 |
| Ciliophora | Spirotrichea | Tintinnidiidae | 0±0 | 0.1±0 | 0±0 | 0±0 | 0±0 | 0±0 | 0±0 | 0±0 | 0±0 |
| Metazoa | Mollusca | Ostreoida | 0.8±0.2 | 0.9±0.4 | 0.4±0.1 | 1±0.6 | 0.8±0.3 | 1.2±0.6 | 1.3±0.5 | 0.4±0.1 | 0.1±0 |
| Gyrista | Mediophyceae | Chaetocerotaceae | 0±0 | 0.1±0 | 0.1±0 | 0±0 | 0±0 | 0±0 | 0.1±0 | 0±0 | 0±0 |
| Fungi | Ascomycota | Taphrinomycetes | 0.1±0.1 | 0±0 | 0±0 | 0.3±0.2 | 0.2±0.1 | 0.3±0.2 | 0.1±0.1 | 0±0 | 0±0 |
| Fungi | Chytridiomycota | Spizellomycetales_X | 0±0 | 0.1±0 | 0±0 | 0±0 | 0±0 | 0±0 | 0±0 | 0±0 | 0±0 |
| Telonemia_X | Telonemia_XX | Telonemia-Group-2 | 0.1±0 | 0.2±0.1 | 0.1±0 | 0.2±0.2 | 0.1±0 | 0±0 | 0.2±0.1 | 0.2±0.1 | 0±0 |
| Fungi | Mucoromycota | Mucorales | 0±0 | 0.1±0.1 | 0±0 | 0.1±0 | 0±0 | 0±0 | 0±0 | 0±0 | 0.2±0.1 |
| Ciliophora | Spirotrichea | Choreotrichida_X | 0.3±0.2 | 0.7±0.6 | 0±0 | 0.1±0 | 0.1±0 | 0.9±0.9 | 0±0 | 0.1±0 | 0±0 |
| Haptophyta_X | Prymnesiophyceae | Chrysochromulinaceae | 0.2±0.1 | 0±0 | 0±0 | 0.6±0.5 | 0.1±0 | 0.1±0 | 0±0 | 0.4±0.4 | 0.1±0 |
| Fungi | Basidiomycota | Microbotryomycetes | 0.2±0.1 | 0±0 | 0±0 | 0.4±0.3 | 0.3±0.2 | 0.1±0 | 0.4±0.3 | 0.1±0.1 | 0±0 |
| Dinoflagellata | Dinophyceae | Peridiniopsidaceae | 0.3±0.3 | 1±0.9 | 0±0 | 0.1±0 | 0.1±0 | 1.3±1.2 | 0±0 | 0.1±0 | 0.1±0 |
| Metazoa | Mollusca | Heteroconchia | 0.5±0.1 | 0.8±0.4 | 0.4±0.1 | 0.1±0 | 0.4±0.2 | 0.6±0.3 | 0.7±0.4 | 0.3±0.1 | 0.2±0 |
| Dinoflagellata | Syndiniales | Dino-Group-II-Clade-5 | 0.2±0.1 | 0.1±0 | 0.2±0.1 | 0±0 | 0.5±0.4 | 0.6±0.6 | 0.1±0 | 0.1±0 | 0.1±0 |
| Metazoa | Mollusca | Protobranchia | 0.3±0.1 | 0.2±0.1 | 0.3±0.1 | 0.2±0.1 | 0.6±0.2 | 0.2±0.1 | 0.2±0.1 | 0.3±0.1 | 0.9±0.3 |
| Metazoa | Mollusca | Carditoida | 0.1±0 | 0±0 | 0±0 | 0±0 | 0.1±0.1 | 0±0 | 0.1±0.1 | 0±0 | 0±0 |
| Metazoa | Urochordata | Ascidiacea | 0.2±0.1 | 0.1±0 | 0.1±0 | 0.1±0 | 0.5±0.3 | 0.5±0.3 | 0.1±0 | 0.1±0 | 0.3±0.2 |
| Telonemia_X | Telonemia_XX | Telonemia-Group-1 | 0±0 | 0.1±0 | 0.1±0 | 0±0 | 0±0 | 0±0 | 0±0 | 0.1±0 | 0±0 |
| Gyrista | Chrysophyceae | Ochromonadaceae | 0.2±0.1 | 0±0 | 0.7±0.6 | 0.1±0.1 | 0.2±0.1 | 0.2±0.2 | 0.1±0 | 0.4±0.3 | 0±0 |
| Dinoflagellata | Syndiniales | Dino-Group-I-Clade-1 | 0.3±0.2 | 0±0 | 1.7±1.6 | 0±0 | 0±0 | 0±0 | 0±0 | 0.8±0.8 | 0±0 |
| Metazoa | Echinodermata | Echinodermata_XX | 0.2±0.1 | 0±0 | 0.6±0.6 | 0.2±0.2 | 0±0 | 0±0 | 0.3±0.3 | 0.2±0.1 | 0±0 |
| Cercozoa | Filosa-Sarcomonadea | Cercomonadidae | 0±0 | 0±0 | 0.2±0.2 | 0±0 | 0±0 | 0±0 | 0±0 | 0.1±0.1 | 0±0 |
| Metazoa | Arthropoda | Branchiopoda | 0.7±0.1 | 1±0.3 | 0.5±0.2 | 0.5±0.1 | 0.6±0.2 | 1±0.3 | 0.9±0.2 | 0.3±0.1 | 0.5±0.2 |
| Metazoa | Porifera | Demospongiae | 0.2±0.1 | 0±0 | 0±0 | 0.4±0.4 | 0.4±0.4 | 0.5±0.5 | 0±0 | 0.3±0.3 | 0±0 |
| Gyrista | Mediophyceae | Cymatosiraceae | 0±0 | 0±0 | 0±0 | 0±0 | 0±0 | 0±0 | 0±0 | 0±0 | 0±0 |
| Fungi | Chytridiomycota | Chytridiomycota_XX | 0.1±0.1 | 0±0 | 0.5±0.4 | 0±0 | 0±0 | 0±0 | 0.2±0.2 | 0±0 | 0±0 |
| Fungi | Chytridiomycota | Chytridiomycetaceae | 0±0 | 0±0 | 0±0 | 0±0 | 0.1±0.1 | 0±0 | 0.1±0.1 | 0±0 | 0±0 |
| Fungi | Chytridiomycota | Chytridiales_X | 0.6±0.4 | 1.7±1.4 | 0±0 | 0.1±0 | 0.3±0.1 | 2.2±1.9 | 0.2±0.1 | 0.1±0 | 0.2±0.1 |
| Gyrista | Mediophyceae | Thalassiosiraceae | 0.2±0.1 | 0.3±0.2 | 0.2±0.2 | 0±0 | 0±0 | 0.3±0.3 | 0±0 | 0.2±0.1 | 0±0 |
| Ciliophora | Spirotrichea | TIN_07 | 0±0 | 0±0 | 0±0 | 0±0 | 0±0 | 0±0 | 0±0 | 0±0 | 0±0 |
| Dinoflagellata | Dinophyceae | Heterocapsaceae | 0±0 | 0±0 | 0±0 | 0±0 | 0±0 | 0±0 | 0±0 | 0±0 | 0±0 |
| Gyrista | Mediophyceae | Mediophyceae_XX | 0.1±0.1 | 0±0 | 0.7±0.7 | 0±0 | 0±0 | 0±0 | 0±0 | 0.4±0.3 | 0±0 |
| Chlorophyta_X | Mamiellophyceae | Bathycoccaceae | 0±0 | 0±0 | 0±0 | 0±0 | 0±0 | 0±0 | 0±0 | 0±0 | 0±0 |
| Haptophyta_X | Prymnesiophyceae | Phaeocystaceae | 0.1±0.1 | 0±0 | 0±0 | 0.4±0.3 | 0±0 | 0.4±0.3 | 0±0 | 0±0 | 0±0 |
| Discosea_X | Flabellinia | Vannellidae | 0.1±0.1 | 0.3±0.3 | 0±0 | 0±0 | 0.1±0 | 0.4±0.4 | 0±0 | 0±0 | 0±0 |
| Haptophyta_X | Prymnesiophyceae | Prymnesiophyceae_Clade_B3 | 0±0 | 0±0 | 0±0 | 0±0 | 0±0 | 0±0 | 0±0 | 0±0 | 0±0 |
| Gyrista | Pelagophyceae | Pelagomonadales_clade_A | 0±0 | 0±0 | 0±0 | 0±0 | 0±0 | 0±0 | 0±0 | 0±0 | 0±0 |
| Dinoflagellata | Dinophyceae | Thoracosphaeraceae | 0.3±0.1 | 0.8±0.4 | 0.4±0.1 | 0.1±0 | 0±0 | 0.6±0.5 | 0.3±0.1 | 0.2±0 | 0.2±0.1 |
| Ciliophora | Spirotrichea | Dictyocystidae | 0±0 | 0±0 | 0±0 | 0±0 | 0±0 | 0±0 | 0±0 | 0±0 | 0±0 |
| Gyrista | Bolidophyceae | Triparmaceae | 0±0 | 0±0 | 0±0 | 0±0 | 0±0 | 0±0 | 0±0 | 0±0 | 0±0 |
| Metazoa | Cnidaria | Scyphozoa | 0±0 | 0±0 | 0±0 | 0.1±0.1 | 0±0 | 0±0 | 0±0 | 0.1±0.1 | 0±0 |
| Ciliophora | Spirotrichea | Tontoniidae | 0±0 | 0±0 | 0±0 | 0±0 | 0±0 | 0±0 | 0±0 | 0±0 | 0±0 |
| Fungi | Basidiomycota | Pucciniomycetes | 0.2±0.1 | 0±0 | 0±0 | 0±0 | 0.5±0.5 | 0±0 | 0±0 | 0±0 | 0.9±0.9 |
| Metazoa | Mollusca | Palaeoheterodonta | 0.2±0 | 0.2±0.1 | 0.2±0.1 | 0.1±0 | 0.2±0.1 | 0.2±0 | 0.1±0 | 0.3±0.1 | 0.1±0.1 |
| Cercozoa | Filosa-Thecofilosea | TAGIRI1-lineage | 0±0 | 0±0 | 0±0 | 0±0 | 0±0 | 0±0 | 0±0 | 0±0 | 0±0 |
| Choanoflagellata | Choanoflagellatea | Choanoflagellatea_XX_Group_L | 0±0 | 0±0 | 0±0 | 0±0 | 0±0 | 0±0 | 0±0 | 0±0 | 0±0 |
| Gyrista | Chrysophyceae | Ochromonadales_X | 0±0 | 0.1±0.1 | 0±0 | 0±0 | 0±0 | 0±0 | 0.1±0.1 | 0±0 | 0±0 |
| Chlorophyta_X | Mamiellophyceae | Mamiellaceae | 0.1±0.1 | 0.2±0.1 | 0.2±0.1 | 0±0 | 0±0 | 0.1±0.1 | 0±0 | 0.2±0.2 | 0±0 |
| Prasinodermophyta_X | Prasinodermophyceae | Prasinodermaceae | 0±0 | 0±0 | 0±0 | 0±0 | 0±0 | 0±0 | 0±0 | 0±0 | 0±0 |
| Chlorophyta_X | Trebouxiophyceae | Microthamniales_X | 0±0 | 0±0 | 0±0 | 0.2±0.2 | 0±0 | 0±0 | 0.1±0.1 | 0±0 | 0±0 |
| Gyrista | Peronosporomycetes | Haliphthorales | 0±0 | 0±0 | 0±0 | 0.1±0.1 | 0±0 | 0±0 | 0±0 | 0±0 | 0±0 |
| Metazoa | Cephalochordata | Cephalochordata_XX | 0.1±0.1 | 0±0 | 0±0 | 0±0 | 0.4±0.2 | 0.2±0.2 | 0±0 | 0±0 | 0.4±0.4 |
| Apicomplexa | Coccidiomorphea | Plasmodiidae | 0.1±0.1 | 0±0 | 0±0 | 0.4±0.4 | 0±0 | 0±0 | 0.3±0.3 | 0±0 | 0±0 |
| Chlorophyta_X | Pyramimonadophyceae | Pyramimonadaceae | 0±0 | 0±0 | 0±0 | 0±0 | 0±0 | 0±0 | 0±0 | 0±0 | 0±0 |
| Gyrista | Bacillariophyceae | Bacillariaceae | 0±0 | 0±0 | 0±0 | 0±0 | 0±0 | 0±0 | 0±0 | 0±0 | 0±0 |
| Gyrista | Dictyochophyceae | Dictyochales | 0±0 | 0±0 | 0±0 | 0±0 | 0±0 | 0±0 | 0±0 | 0±0 | 0±0 |
| Fungi | Chytridiomycota | Spizellomycetaceae | 0±0 | 0±0 | 0±0 | 0±0 | 0±0 | 0±0 | 0±0 | 0±0 | 0±0 |
| Gyrista | Xanthophyceae | Xanthophyceae_XX | 0±0 | 0±0 | 0±0 | 0±0 | 0±0 | 0±0 | 0±0 | 0±0 | 0±0 |
| Gyrista | Gyrista_X | MAST-2 | 0±0 | 0±0 | 0±0 | 0±0 | 0±0 | 0±0 | 0±0 | 0±0 | 0±0 |
| Metazoa | Arthropoda | Pycnogonida | 0.6±0.2 | 0.2±0.1 | 0.5±0.2 | 0.3±0.1 | 1.4±0.5 | 0.6±0.3 | 0.1±0 | 0.3±0.1 | 2.2±0.9 |
| Kathablepharida | Kathablepharidea | Kathablepharidida_X | 0.2±0.1 | 0.1±0 | 0±0 | 0.2±0.2 | 0.4±0.2 | 0.1±0.1 | 0.1±0.1 | 0.3±0.2 | 0±0 |
| Cryptophyta_X | Cryptophyceae | Baffinellaceae | 0±0 | 0±0 | 0±0 | 0.1±0.1 | 0±0 | 0±0 | 0±0 | 0±0 | 0±0 |
| Chlorophyta_X | Chloropicophyceae | Chloropicaceae | 0±0 | 0±0 | 0±0 | 0.1±0.1 | 0±0 | 0.1±0.1 | 0±0 | 0±0 | 0±0 |
| Ciliophora | Prostomatea | Urotrichidae | 0±0 | 0±0 | 0±0 | 0±0 | 0±0 | 0±0 | 0±0 | 0±0 | 0±0 |
| Gyrista | Chrysophyceae | Paraphysomonadaceae | 0±0 | 0±0 | 0±0 | 0±0 | 0±0 | 0±0 | 0±0 | 0±0 | 0±0 |
| Metazoa | Craniata | Mammalia | 0.3±0.1 | 0.1±0 | 0.1±0 | 0.3±0.1 | 0.5±0.2 | 0.4±0.2 | 0.2±0.1 | 0.2±0.1 | 0.2±0.1 |
| Dinoflagellata | Dinophyceae | Gymnodiniaceae | 0±0 | 0.1±0 | 0±0 | 0.1±0 | 0±0 | 0±0 | 0.1±0 | 0.1±0 | 0±0 |
| Metazoa | Mollusca | Polyplacophora_X | 0.2±0 | 0.1±0 | 0.2±0.1 | 0.1±0 | 0.4±0.1 | 0±0 | 0.1±0 | 0.2±0.1 | 0.5±0.2 |
| Bigyra | Opalozoa | MAST-3 | 0±0 | 0±0 | 0±0 | 0.1±0.1 | 0±0 | 0±0 | 0.1±0.1 | 0±0 | 0±0 |
| Gyrista | Chrysophyceae | Chrysophyceae_Clade-EC2H_X | 0±0 | 0±0 | 0±0 | 0±0 | 0.1±0 | 0±0 | 0±0 | 0±0 | 0.1±0 |
| Metazoa | Platyhelminthes | Prolecithophora | 0±0 | 0.1±0 | 0±0 | 0±0 | 0±0 | 0.1±0 | 0±0 | 0±0 | 0±0 |
| Metazoa | Mollusca | Caenogastropoda | 0.3±0.1 | 0.3±0.1 | 0.5±0.2 | 0.1±0 | 0.2±0.1 | 0.3±0.1 | 0.3±0.1 | 0.2±0.1 | 0.2±0.1 |
| Choanoflagellata | Choanoflagellatea | Stephanoecidae | 0±0 | 0±0 | 0±0 | 0±0 | 0±0 | 0±0 | 0±0 | 0±0 | 0±0 |
| Chlorophyta_X | Mamiellophyceae | Monomastigaceae | 0±0 | 0±0 | 0±0 | 0±0 | 0±0 | 0±0 | 0±0 | 0±0 | 0±0 |
| Metazoa | Mollusca | Anomalodesmata | 0±0 | 0±0 | 0±0 | 0±0 | 0±0 | 0±0 | 0±0 | 0±0 | 0±0 |
| Metazoa | Mollusca | Mytiloida | 0.1±0 | 0.1±0 | 0.1±0.1 | 0.1±0 | 0.2±0.1 | 0.2±0.1 | 0.1±0 | 0.2±0.1 | 0.1±0 |
| Cryptophyta_X | Cryptophyceae | Pyrenomonadaceae | 0±0 | 0±0 | 0±0 | 0±0 | 0±0 | 0±0 | 0±0 | 0±0 | 0±0 |
| Metazoa | Cnidaria | Anthozoa | 0±0 | 0±0 | 0±0 | 0±0 | 0±0 | 0±0 | 0±0 | 0±0 | 0±0 |
| Metazoa | Craniata | Testudines | 0±0 | 0±0 | 0±0 | 0±0 | 0±0 | 0±0 | 0±0 | 0±0 | 0±0 |
| Metazoa | Craniata | Lepidosauria | 0±0 | 0±0 | 0±0 | 0±0 | 0±0 | 0±0 | 0±0 | 0±0 | 0±0 |
| Discoba_X | Discoba_XX | Jakobida_X | 0±0 | 0.1±0.1 | 0±0 | 0±0 | 0±0 | 0.2±0.1 | 0±0 | 0±0 | 0±0 |
| Bigyra | Opalozoa | Blastocystis-Group | 0±0 | 0±0 | 0±0 | 0±0 | 0±0 | 0±0 | 0±0 | 0±0 | 0±0 |
| Perkinsea | Perkinsida | Perkinsida_XX | 0±0 | 0±0 | 0±0 | 0±0 | 0±0 | 0±0 | 0±0 | 0±0 | 0±0 |
| Chlorophyta_X | Chlorophyceae | Chlamydomonadales_X | 0±0 | 0±0 | 0±0 | 0±0 | 0±0 | 0±0 | 0.1±0 | 0±0 | 0±0 |
| Metazoa | Entoprocta | Entoprocta_XX | 0.1±0 | 0±0 | 0±0 | 0.1±0 | 0.1±0 | 0.1±0 | 0.1±0 | 0±0 | 0.1±0 |
| Dinoflagellata | Syndiniales | Dino-Group-III_X | 0±0 | 0±0 | 0±0 | 0±0 | 0.1±0.1 | 0.1±0.1 | 0±0 | 0±0 | 0±0 |
| Metazoa | Platyhelminthes | Rhabdocoela | 0.1±0 | 0.1±0 | 0.1±0.1 | 0±0 | 0.1±0 | 0±0 | 0±0 | 0.1±0 | 0.1±0.1 |
| Ichthyosporea | Ichthyophonida | Pseudoperkinsidae_X | 0±0 | 0±0 | 0±0 | 0±0 | 0±0 | 0±0 | 0±0 | 0±0 | 0±0 |
| Cercozoa | Filosa-Thecofilosea | Ebriidae | 0±0 | 0±0 | 0±0 | 0±0 | 0±0 | 0±0 | 0±0 | 0±0 | 0±0 |
| Gyrista | Chrysophyceae | Chrysophyceae_env_clade-I_X | 0±0 | 0±0 | 0±0 | 0±0 | 0±0 | 0±0 | 0±0 | 0±0 | 0±0 |
| Metazoa | Craniata | Chondrichthyes | 0±0 | 0±0 | 0±0 | 0±0 | 0.1±0 | 0±0 | 0±0 | 0±0 | 0.1±0.1 |
| Metazoa | Annelida | Siboglinidae | 0±0 | 0±0 | 0±0 | 0.1±0.1 | 0±0 | 0±0 | 0.1±0.1 | 0±0 | 0±0 |
| Haptophyta_X | Rappephyceae | Pavlomulinaceae | 0±0 | 0±0 | 0±0 | 0±0 | 0±0 | 0±0 | 0±0 | 0±0 | 0±0 |
| Apusomonada_X | Apusomonadidae | Apusomonadidae_Group-1_X | 0±0 | 0±0 | 0±0 | 0±0 | 0±0 | 0±0 | 0±0 | 0±0 | 0±0 |
| Gyrista | Peronosporomycetes | Peronosporomycetes_XX | 0±0 | 0±0 | 0±0 | 0±0 | 0±0 | 0±0 | 0±0 | 0±0 | 0±0 |
| Ciliophora | Spirotrichea | Oxytrichidae | 0±0 | 0±0 | 0±0 | 0±0 | 0±0 | 0±0 | 0±0 | 0±0 | 0±0 |
| Fungi | Chytridiomycota | Powellomycetaceae | 0±0 | 0±0 | 0±0 | 0±0 | 0±0 | 0±0 | 0±0 | 0±0 | 0±0 |
| Metazoa | Hemichordata | Hemichordata_XX | 0.2±0 | 0.1±0 | 0±0 | 0.2±0.1 | 0.3±0.1 | 0.4±0.1 | 0.1±0 | 0.1±0 | 0.1±0 |
| Metazoa | Brachiopoda | Brachiopoda_XX | 0.1±0 | 0.1±0 | 0.3±0.2 | 0.1±0 | 0.2±0.1 | 0.1±0 | 0.1±0 | 0.2±0.1 | 0.3±0.1 |
| Metazoa | Tardigrada | Tardigrada_XX | 0.1±0 | 0±0 | 0.4±0.2 | 0±0 | 0±0 | 0±0 | 0.2±0.1 | 0±0 | 0±0 |
| Fungi | Ascomycota | Orbiliomycetes | 0±0 | 0±0 | 0±0 | 0±0 | 0±0 | 0±0 | 0±0 | 0±0 | 0±0 |
| Metazoa | Platyhelminthes | Turbellaria_X | 0±0 | 0±0 | 0±0 | 0±0 | 0.1±0 | 0±0 | 0±0 | 0±0 | 0.2±0.1 |
| Chlorophyta_X | Trebouxiophyceae | Watanabea-Clade_X | 0±0 | 0±0 | 0±0 | 0±0 | 0±0 | 0±0 | 0±0 | 0±0 | 0±0 |
| Metazoa | Micrognathozoa | Micrognathozoa_XX | 0±0 | 0±0 | 0±0 | 0±0 | 0±0 | 0±0 | 0±0 | 0±0 | 0±0 |
| Dinoflagellata | Syndiniales | Dino-Group-II_X | 0±0 | 0±0 | 0±0 | 0±0 | 0±0 | 0±0 | 0±0 | 0±0 | 0±0 |
| Dinoflagellata | Syndiniales | Syndiniales_XX | 0±0 | 0±0 | 0±0 | 0±0 | 0±0 | 0±0 | 0±0 | 0±0 | 0±0 |
| Chlorophyta_X | Mamiellophyceae | Dolichomastigaceae | 0±0 | 0±0 | 0±0 | 0±0 | 0±0 | 0±0 | 0±0 | 0±0 | 0±0 |
| Chlorophyta_X | Chlorophyceae | Sphaeropleales_X | 0±0 | 0.1±0.1 | 0±0 | 0±0 | 0±0 | 0.1±0.1 | 0±0 | 0±0 | 0±0 |
| Cercozoa | Endomyxa-Ascetosporea | Paradinidae | 0±0 | 0±0 | 0±0 | 0±0 | 0±0 | 0±0 | 0±0 | 0±0 | 0±0 |
| Ciliophora | Heterotrichea | Condylostomatidae | 0±0 | 0±0 | 0±0 | 0±0 | 0±0 | 0±0 | 0±0 | 0±0 | 0±0 |
| Metazoa | Mollusca | Pterioida-Pinnidae | 0±0 | 0±0 | 0±0 | 0±0 | 0±0 | 0±0 | 0±0 | 0±0 | 0±0 |
| Choanoflagellata | Choanoflagellatea | Choanoflagellatea_XX | 0±0 | 0±0 | 0±0 | 0±0 | 0±0 | 0±0 | 0±0 | 0±0 | 0±0 |
| Fungi | Ascomycota | Saccharomycotina_X | 0±0 | 0±0 | 0±0 | 0±0 | 0±0 | 0±0 | 0±0 | 0±0 | 0±0 |
| Fungi | Mucoromycota | Archaeosporales | 0±0 | 0±0 | 0±0 | 0±0 | 0±0 | 0±0 | 0±0 | 0±0 | 0±0 |
| Fungi | Mucoromycota | Glomeromycotina_X | 0±0 | 0±0 | 0±0 | 0±0 | 0±0 | 0±0 | 0±0 | 0±0 | 0±0 |
| Dinoflagellata | Syndiniales | Dino-Group-II-Clade-26 | 0±0 | 0±0 | 0±0 | 0±0 | 0±0 | 0±0 | 0±0 | 0±0 | 0±0 |
| Chrompodellids | Colpodellidea | Chromeraceae | 0±0 | 0±0 | 0±0 | 0±0 | 0±0 | 0±0 | 0±0 | 0±0 | 0±0 |
| Metazoa | Mollusca | Arcoida | 0±0 | 0±0 | 0±0 | 0±0 | 0.1±0 | 0±0 | 0±0 | 0±0 | 0±0 |
| Gyrista | Phaeophyceae | Phaeophyceae_XX | 0.1±0 | 0±0 | 0±0 | 0±0 | 0.2±0.2 | 0±0 | 0±0 | 0.1±0.1 | 0±0 |
| Dinoflagellata | Noctilucophyceae | Noctilucaceae | 0±0 | 0±0 | 0±0 | 0±0 | 0±0 | 0±0 | 0±0 | 0±0 | 0±0 |
| Dinoflagellata | Syndiniales | Dino-Group-II-Clade-17 | 0±0 | 0±0 | 0±0 | 0±0 | 0±0 | 0±0 | 0±0 | 0±0 | 0±0 |
| Metazoa | Arthropoda | Ostracoda | 0±0 | 0.1±0 | 0±0 | 0±0 | 0±0 | 0±0 | 0±0 | 0±0 | 0.1±0.1 |
| Cercozoa | Filosa-Thecofilosea | Filosa-Thecofilosea_XX | 0±0 | 0±0 | 0±0 | 0±0 | 0±0 | 0±0 | 0±0 | 0±0 | 0±0 |
| Metazoa | Rotifera | Rotifera_XX | 0.1±0 | 0.1±0.1 | 0.2±0.1 | 0.1±0.1 | 0±0 | 0.1±0 | 0.1±0 | 0.2±0.1 | 0.1±0 |
| Dinoflagellata | Syndiniales | Dino-Group-II-Clade-7 | 0±0 | 0±0 | 0±0 | 0±0 | 0±0 | 0±0 | 0±0 | 0±0 | 0±0 |
| Metazoa | Arthropoda | Chilopoda | 0±0 | 0±0 | 0±0 | 0±0 | 0.1±0.1 | 0±0 | 0±0 | 0±0 | 0.2±0.1 |
| Gyrista | Chrysophyceae | Chrysophyceae_Clade-EC2I_X | 0±0 | 0±0 | 0±0 | 0±0 | 0±0 | 0±0 | 0±0 | 0±0 | 0±0 |
| Metazoa | Priapulida | Priapulida_XX | 0.2±0.1 | 0.3±0.1 | 0.1±0 | 0.2±0.1 | 0.1±0.1 | 0.3±0.1 | 0.3±0.1 | 0.1±0 | 0.1±0.1 |
| Dinoflagellata | Syndiniales | Dino-Group-II-Clade-1 | 0±0 | 0±0 | 0±0 | 0±0 | 0±0 | 0±0 | 0±0 | 0±0 | 0±0 |
| Metazoa | Kinorhyncha | Kinorhyncha_XX | 0±0 | 0±0 | 0±0 | 0±0 | 0±0 | 0±0 | 0±0 | 0±0 | 0±0 |
| Discosea_X | Flabellinia | Thecamoebidae | 0±0 | 0±0 | 0±0 | 0±0 | 0±0 | 0±0 | 0±0 | 0±0 | 0±0 |
| Choanoflagellata | Choanoflagellatea | Monosigidae_Group_M | 0±0 | 0±0 | 0±0 | 0±0 | 0±0 | 0±0 | 0±0 | 0±0 | 0±0 |
| Metazoa | Arthropoda | Diplopoda | 0.1±0 | 0.1±0 | 0.1±0.1 | 0±0 | 0±0 | 0±0 | 0±0 | 0.1±0 | 0±0 |
| Metazoa | Platyhelminthes | Digenea | 0±0 | 0±0 | 0.1±0 | 0±0 | 0.1±0 | 0±0 | 0±0 | 0±0 | 0.1±0.1 |
| Metazoa | Craniata | Amphibia | 0±0 | 0±0 | 0±0 | 0.1±0.1 | 0±0 | 0.1±0.1 | 0±0 | 0±0 | 0±0 |
| Fungi | Mucoromycota | Endogonales | 0±0 | 0±0 | 0±0 | 0±0 | 0±0 | 0±0 | 0±0 | 0±0 | 0±0 |
| Metazoa | Nemertea | Hubrechtidae | 0±0 | 0±0 | 0±0 | 0±0 | 0±0 | 0±0 | 0±0 | 0±0 | 0.1±0 |
| Dinoflagellata | Dinophyceae | Ceratoperidiniaceae | 0±0 | 0±0 | 0±0 | 0±0 | 0±0 | 0±0 | 0±0 | 0±0 | 0±0 |
| Apicomplexa | Coccidiomorphea | Eimeriidae | 0±0 | 0±0 | 0±0 | 0±0 | 0±0 | 0±0 | 0±0 | 0±0 | 0±0 |
| Metazoa | Mollusca | Neritopsina | 0.1±0 | 0±0 | 0.2±0.1 | 0±0 | 0±0 | 0±0 | 0±0 | 0.1±0.1 | 0±0 |
| Metazoa | Platyhelminthes | Seriata | 0.2±0.1 | 0.5±0.2 | 0.2±0.1 | 0±0 | 0.1±0 | 0.4±0.2 | 0.2±0.1 | 0.1±0 | 0.1±0.1 |
| Dinoflagellata | Syndiniales | Dino-Group-II-Clade-8 | 0±0 | 0±0 | 0±0 | 0±0 | 0±0 | 0±0 | 0±0 | 0±0 | 0±0 |
| Dinoflagellata | Syndiniales | Dino-Group-I-Clade-4 | 0±0 | 0±0 | 0±0 | 0±0 | 0±0 | 0±0 | 0±0 | 0±0 | 0±0 |
| Dinoflagellata | Dinophyceae | Protoperidiniaceae | 0±0 | 0±0 | 0±0 | 0±0 | 0±0 | 0±0 | 0±0 | 0±0 | 0±0 |
| Fungi | Basidiomycota | Ustilaginomycetes | 0±0 | 0±0 | 0±0 | 0±0 | 0±0 | 0±0 | 0±0 | 0±0 | 0±0 |
| Metazoa | Arthropoda | Chelicerata_X | 0±0 | 0±0 | 0±0 | 0±0 | 0.1±0 | 0±0 | 0±0 | 0±0 | 0.1±0.1 |
| Metazoa | Myxozoa | Myxosporea | 0±0 | 0±0 | 0±0 | 0±0 | 0±0 | 0±0 | 0±0 | 0±0 | 0±0 |
| Hemimastigophora_X | Hemimastigophora_XX | Spironemidae | 0±0 | 0±0 | 0±0 | 0±0 | 0±0 | 0±0 | 0±0 | 0±0 | 0±0 |
| Chlorophyta_X | Chlorophyceae | Chlorophyceae_XX | 0±0 | 0±0 | 0±0 | 0±0 | 0±0 | 0±0 | 0±0 | 0±0 | 0±0 |
| Chlorophyta_X | Ulvophyceae | Trentepohliales_X | 0±0 | 0±0 | 0±0 | 0±0 | 0±0 | 0±0 | 0±0 | 0±0 | 0±0 |
| Fungi | Mucoromycota | Diversisporales | 0±0 | 0±0 | 0±0 | 0±0 | 0±0 | 0±0 | 0±0 | 0±0 | 0±0 |
| Cercozoa | Filosa-Sarcomonadea | Allapsidae | 0±0 | 0±0 | 0±0 | 0±0 | 0±0 | 0±0 | 0±0 | 0±0 | 0±0 |
| Dinoflagellata | Dinophyceae | Symbiodiniaceae | 0±0 | 0±0 | 0±0 | 0±0 | 0±0 | 0±0 | 0±0 | 0±0 | 0±0 |
| Dinoflagellata | Dinophyceae | Amphidiniopsidaceae | 0±0 | 0±0 | 0±0 | 0±0 | 0±0 | 0±0 | 0±0 | 0±0 | 0±0 |
| Metazoa | Craniata | Archosauria | 0±0 | 0±0 | 0±0 | 0±0 | 0±0 | 0±0 | 0±0 | 0±0 | 0±0 |
| Haptophyta_X | Haptophyta_XX | Haptophyta_XXXX | 0±0 | 0±0 | 0±0 | 0±0 | 0±0 | 0±0 | 0±0 | 0±0 | 0±0 |
| Fungi | Basidiomycota | Atractiellomycetes | 0±0 | 0±0 | 0±0 | 0±0 | 0±0 | 0±0 | 0±0 | 0±0 | 0±0 |
| Fungi | Basidiomycota | Wallemiales | 0±0 | 0±0 | 0±0 | 0±0 | 0±0 | 0±0 | 0±0 | 0±0 | 0±0 |
| Ciliophora | Oligohymenophorea | Philasterida | 0±0 | 0±0 | 0±0 | 0±0 | 0±0 | 0±0 | 0±0 | 0±0 | 0±0 |
| Gyrista | Chrysophyceae | Chrysophyceae_XX | 0±0 | 0±0 | 0±0 | 0±0 | 0±0 | 0±0 | 0±0 | 0±0 | 0±0 |
| Metazoa | Platyhelminthes | Lecithoepitheliata | 0.1±0 | 0±0 | 0.2±0.1 | 0±0 | 0±0 | 0±0 | 0±0 | 0.1±0.1 | 0±0 |
| Metazoa | Mollusca | Cucculiniforma | 0±0 | 0±0 | 0±0 | 0±0 | 0±0 | 0±0 | 0±0 | 0±0 | 0±0 |
| Dinoflagellata | Dinophyta_X | Dinophyta_XXX | 0±0 | 0±0 | 0±0 | 0±0 | 0±0 | 0±0 | 0±0 | 0±0 | 0±0 |
| Chlorophyta_X | Ulvophyceae | Dasycladales_X | 0±0 | 0±0 | 0±0 | 0±0 | 0±0 | 0±0 | 0±0 | 0±0 | 0±0 |
| Nebulidia_X | Nebulidea | Nebulidae | 0±0 | 0±0 | 0±0 | 0±0 | 0±0 | 0±0 | 0±0 | 0±0 | 0±0 |
| Ciliophora | Litostomatea | Lacrymariidae | 0±0 | 0±0 | 0±0 | 0±0 | 0±0 | 0±0 | 0±0 | 0±0 | 0±0 |
| Choanoflagellata | Choanoflagellatea | Choanoflagellatea_XX_Group_Q | 0±0 | 0±0 | 0±0 | 0±0 | 0±0 | 0±0 | 0±0 | 0±0 | 0±0 |
| Chlorophyta_X | Pyramimonadophyceae | Pycnococcaceae | 0±0 | 0±0 | 0±0 | 0±0 | 0±0 | 0±0 | 0±0 | 0±0 | 0±0 |
| Apicomplexa | Gregarinomorphea | Gregarinidae | 0±0 | 0±0 | 0±0 | 0±0 | 0±0 | 0±0 | 0±0 | 0±0 | 0±0 |
| Chrompodellids | Colpodellidea | Colpodellaceae | 0±0 | 0±0 | 0±0 | 0±0 | 0±0 | 0±0 | 0±0 | 0±0 | 0±0 |
| Streptophyta_X | Zygnemophyceae | Zygnemophyceae_XX | 0±0 | 0±0 | 0±0 | 0±0 | 0±0 | 0±0 | 0±0 | 0±0 | 0±0 |
| Metazoa | Mollusca | Pterioida-Pterioidea | 0.1±0.1 | 0.2±0.2 | 0±0 | 0.1±0.1 | 0.1±0 | 0.3±0.2 | 0±0 | 0.1±0.1 | 0.1±0 |
| Chlorophyta_X | Chlorophyta_XX | Chlorophyta_XXXX | 0±0 | 0±0 | 0±0 | 0±0 | 0±0 | 0±0 | 0±0 | 0±0 | 0±0 |
| Metazoa | Acanthocephala | Acanthocephala_XX | 0±0 | 0±0 | 0±0 | 0±0 | 0±0 | 0±0 | 0±0 | 0±0 | 0±0 |
| Metazoa | Platyhelminthes | Polycladida | 0±0 | 0±0 | 0±0 | 0±0 | 0±0 | 0±0 | 0±0 | 0±0 | 0±0 |
| Choanoflagellata | Choanoflagellatea | Monosigidae_Group_A | 0±0 | 0±0 | 0±0 | 0±0 | 0±0 | 0±0 | 0±0 | 0±0 | 0±0 |
| Ciliophora | Heterotrichea | Peritromidae | 0±0 | 0±0 | 0±0 | 0±0 | 0±0 | 0±0 | 0±0 | 0±0 | 0±0 |
| Fungi | Chytridiomycota | Gromochytriaceae | 0±0 | 0±0 | 0±0 | 0±0 | 0±0 | 0±0 | 0±0 | 0±0 | 0±0 |
| Metazoa | Porifera | Calcarea | 0±0 | 0±0 | 0±0 | 0±0 | 0±0 | 0±0 | 0±0 | 0±0 | 0±0 |
| Streptophyta_X | Streptophyta_XX | Streptophyta_XXXX | 0±0 | 0±0 | 0±0 | 0±0 | 0±0 | 0±0 | 0±0 | 0±0 | 0±0 |
| Fungi | Fungi_X | Fungi_XXX | 0±0 | 0±0 | 0±0 | 0±0 | 0±0 | 0±0 | 0±0 | 0±0 | 0±0 |
| Metazoa | Mollusca | Gastropoda_X | 0±0 | 0±0 | 0±0 | 0±0 | 0±0 | 0±0 | 0±0 | 0±0 | 0±0 |
| Metazoa | Gastrotricha | Gastrotricha_XX | 0±0 | 0±0 | 0±0 | 0±0 | 0±0 | 0±0 | 0±0 | 0±0 | 0±0 |
| Metazoa | Platyhelminthes | Catenulida | 0.1±0 | 0.1±0 | 0.1±0.1 | 0±0 | 0±0 | 0.1±0 | 0±0 | 0.1±0 | 0±0 |
| Metazoa | Mollusca | Heterobranchia | 0±0 | 0±0 | 0±0 | 0±0 | 0±0 | 0±0 | 0±0 | 0±0 | 0±0 |
| Ciliophora | Spirotrichea | Uronychiidae | 0±0 | 0±0 | 0±0 | 0±0 | 0±0 | 0±0 | 0±0 | 0±0 | 0±0 |
| Metazoa | Arthropoda | Merostomata | 0±0 | 0±0 | 0±0 | 0±0 | 0±0 | 0±0 | 0±0 | 0±0 | 0±0 |
| Bigyra | Sagenista | Labyrinthulomycetes_LAB13 | 0±0 | 0±0 | 0±0 | 0±0 | 0±0 | 0±0 | 0±0 | 0±0 | 0±0 |
| Centroplasthelida_X | Pterocystida | Pterocystidae | 0±0 | 0±0 | 0±0 | 0±0 | 0±0 | 0±0 | 0±0 | 0±0 | 0±0 |
| Dinoflagellata | Syndiniales | Dino-Group-II-Clade-27 | 0±0 | 0±0 | 0±0 | 0±0 | 0±0 | 0±0 | 0±0 | 0±0 | 0±0 |
| Fungi | Chytridiomycota | Gorgonomycetaceae | 0±0 | 0±0 | 0±0 | 0±0 | 0±0 | 0±0 | 0±0 | 0±0 | 0±0 |
| Gyrista | Chrysophyceae | Stylococcaceae | 0±0 | 0±0 | 0±0 | 0±0 | 0±0 | 0±0 | 0±0 | 0±0 | 0±0 |
| Cercozoa | Filosa-Granofilosea | Novel-Gran-234 | 0±0 | 0±0 | 0±0 | 0±0 | 0±0 | 0±0 | 0±0 | 0±0 | 0±0 |
| Chlorophyta_X | Chlorodendrophyceae | Chlorodendraceae | 0±0 | 0±0 | 0±0 | 0±0 | 0±0 | 0±0 | 0±0 | 0±0 | 0±0 |
| Fungi | Basidiomycota | Tritirachiomycetes | 0±0 | 0±0 | 0±0 | 0±0 | 0±0 | 0±0 | 0±0 | 0±0 | 0±0 |
| Metazoa | Platyhelminthes | Acoelomorpha | 0±0 | 0±0 | 0±0 | 0±0 | 0±0 | 0±0 | 0±0 | 0±0 | 0±0 |
| Dinoflagellata | Dinophyceae | Kareniaceae | 0±0 | 0±0 | 0±0 | 0±0 | 0±0 | 0±0 | 0±0 | 0±0 | 0±0 |
| Haptophyta_X | Haptophyta_Clade_HAP4 | Haptophyta_Clade_HAP4_XX | 0±0 | 0±0 | 0±0 | 0±0 | 0±0 | 0±0 | 0±0 | 0±0 | 0±0 |
| Cercozoa | Filosa-Imbricatea | Marimonadida_X | 0±0 | 0±0 | 0±0 | 0±0 | 0±0 | 0±0 | 0±0 | 0±0 | 0±0 |
| Discosea_X | Flabellinia | Dermamoebidae | 0±0 | 0±0 | 0±0 | 0±0 | 0±0 | 0±0 | 0±0 | 0±0 | 0±0 |
| Ciliophora | Prostomatea | Prostomatea_XX | 0±0 | 0±0 | 0±0 | 0±0 | 0±0 | 0±0 | 0±0 | 0±0 | 0±0 |
| Gyrista | Chrysophyceae | Segregatospumellaceae | 0±0 | 0±0 | 0±0 | 0±0 | 0±0 | 0±0 | 0±0 | 0±0 | 0±0 |
| Haptophyta_X | Haptophyta_Clade_HAP2 | Haptophyta_Clade_HAP2_XX | 0±0 | 0±0 | 0±0 | 0±0 | 0±0 | 0±0 | 0±0 | 0±0 | 0±0 |
| Metazoa | Platyhelminthes | Polyopisthocotylea | 0±0 | 0±0 | 0±0 | 0±0 | 0±0 | 0±0 | 0±0 | 0±0 | 0±0 |
| Metazoa | Placozoa | Placozoa_XX | 0±0 | 0±0 | 0±0 | 0±0 | 0±0 | 0±0 | 0±0 | 0±0 | 0±0 |
| Haptophyta_X | Prymnesiophyceae | Prymnesiaceae | 0±0 | 0±0 | 0±0 | 0±0 | 0±0 | 0±0 | 0±0 | 0±0 | 0±0 |
| Glaucophyta_X | Glaucocystophyceae | Glaucocystaceae | 0±0 | 0±0 | 0±0 | 0±0 | 0±0 | 0±0 | 0±0 | 0±0 | 0±0 |
| Ciliophora | Armophorea | Armophorea_XX | 0±0 | 0±0 | 0±0 | 0±0 | 0±0 | 0±0 | 0±0 | 0±0 | 0±0 |
| Metazoa | Craniata | Coelacanthiformes | 0±0 | 0±0 | 0±0 | 0±0 | 0±0 | 0±0 | 0±0 | 0±0 | 0±0 |
| Fungi | Basidiomycota | Agaricostilbomycetes | 0±0 | 0±0 | 0±0 | 0±0 | 0±0 | 0±0 | 0±0 | 0±0 | 0±0 |
| Cercozoa | Filosa-Thecofilosea | Ventrifissuridae | 0±0 | 0±0 | 0±0 | 0±0 | 0±0 | 0±0 | 0±0 | 0±0 | 0±0 |
| Fungi | Ascomycota | Pezizomycetes | 0±0 | 0±0 | 0±0 | 0±0 | 0±0 | 0±0 | 0±0 | 0±0 | 0±0 |
| Dinoflagellata | Syndiniales | Dino-Group-I-Clade-2 | 0±0 | 0±0 | 0±0 | 0±0 | 0±0 | 0±0 | 0±0 | 0±0 | 0±0 |
| Ciliophora | Spirotrichea | Discocephalidae | 0±0 | 0±0 | 0±0 | 0±0 | 0±0 | 0±0 | 0±0 | 0±0 | 0±0 |
| Choanoflagellata | Choanoflagellatea | Stephanoecidae_Group_H | 0±0 | 0±0 | 0±0 | 0±0 | 0±0 | 0±0 | 0±0 | 0±0 | 0±0 |
| Rhodophyta_X | Rhodellophyceae | Rhodellales_X | 0±0 | 0±0 | 0±0 | 0±0 | 0±0 | 0±0 | 0±0 | 0±0 | 0±0 |
| Fungi | Chytridiomycota | Rhizophydiales_X | 0±0 | 0±0 | 0±0 | 0±0 | 0±0 | 0±0 | 0±0 | 0±0 | 0±0 |
| Chlorophyta_X | Chlorophyceae | Chaetophorales_X | 0±0 | 0±0 | 0±0 | 0±0 | 0±0 | 0±0 | 0±0 | 0±0 | 0±0 |
| Chlorophyta_X | Ulvophyceae | Ulvales-relatives_X | 0±0 | 0±0 | 0±0 | 0±0 | 0±0 | 0±0 | 0±0 | 0±0 | 0±0 |
| Metazoa | Mollusca | Limoida | 0±0 | 0±0 | 0±0 | 0±0 | 0±0 | 0±0 | 0±0 | 0±0 | 0±0 |
| Cercozoa | Endomyxa | Sey055-lineage | 0±0 | 0±0 | 0±0 | 0±0 | 0±0 | 0±0 | 0±0 | 0±0 | 0±0 |
| Streptophyta_X | Charophyceae | Charophyceae_XX | 0±0 | 0±0 | 0±0 | 0±0 | 0±0 | 0±0 | 0±0 | 0±0 | 0±0 |
| Radiolaria | Acantharea | Acantharea_1_X | 0±0 | 0±0 | 0±0 | 0±0 | 0±0 | 0±0 | 0±0 | 0±0 | 0±0 |
| Apicomplexa | Coccidiomorphea | Marosporida_X | 0±0 | 0±0 | 0±0 | 0±0 | 0±0 | 0±0 | 0±0 | 0±0 | 0±0 |
| Tubulinea_X | Elardia | Vermamoebidae | 0±0 | 0±0 | 0±0 | 0±0 | 0±0 | 0±0 | 0±0 | 0±0 | 0±0 |
| Cercozoa | Phaeodarea | Conchariidae | 0±0 | 0±0 | 0±0 | 0±0 | 0±0 | 0±0 | 0±0 | 0±0 | 0±0 |
| Metazoa | Arthropoda | Pauropoda | 0±0 | 0±0 | 0±0 | 0±0 | 0±0 | 0±0 | 0±0 | 0±0 | 0±0 |
| Ciliophora | Spirotrichea | Rhabdonellidae | 0±0 | 0±0 | 0±0 | 0±0 | 0±0 | 0±0 | 0±0 | 0±0 | 0±0 |
| Gyrista | Raphidophyceae | Raphidophyceae_XX | 0±0 | 0±0 | 0±0 | 0±0 | 0±0 | 0±0 | 0±0 | 0±0 | 0±0 |
| Cercozoa | Filosa-Thecofilosea | Botuliformidae | 0±0 | 0±0 | 0±0 | 0±0 | 0±0 | 0±0 | 0±0 | 0±0 | 0±0 |
| Metazoa | Craniata | Acipenseriformes | 0±0 | 0±0 | 0±0 | 0±0 | 0±0 | 0±0 | 0±0 | 0±0 | 0±0 |
| Choanoflagellata | Choanoflagellatea | Acanthoecidae_Group_G | 0±0 | 0±0 | 0±0 | 0±0 | 0±0 | 0±0 | 0±0 | 0±0 | 0±0 |
| Gyrista | Bacillariophyceae | Catenulaceae | 0±0 | 0±0 | 0±0 | 0±0 | 0±0 | 0±0 | 0±0 | 0±0 | 0±0 |
| Fungi | Ascomycota | Lipomycetaceae | 0±0 | 0±0 | 0±0 | 0±0 | 0±0 | 0±0 | 0±0 | 0±0 | 0±0 |
| Dinoflagellata | Syndiniales | Dino-Group-II-Clade-22 | 0±0 | 0±0 | 0±0 | 0±0 | 0±0 | 0±0 | 0±0 | 0±0 | 0±0 |
| Ichthyosporea | Ichthyophonida | Amoebidianae | 0±0 | 0±0 | 0±0 | 0±0 | 0±0 | 0±0 | 0±0 | 0±0 | 0±0 |
| Ichthyosporea | Dermocystida | Rhynosporidae_X | 0±0 | 0±0 | 0±0 | 0±0 | 0±0 | 0±0 | 0±0 | 0±0 | 0±0 |
| Filasterea | Filasterea_X | Filasterea_XXX | 0±0 | 0±0 | 0±0 | 0±0 | 0±0 | 0±0 | 0±0 | 0±0 | 0±0 |
| Haptophyta_X | Pavlovophyceae | Pavlovaceae | 0±0 | 0±0 | 0±0 | 0±0 | 0±0 | 0±0 | 0±0 | 0±0 | 0±0 |
| Ciliophora | Spirotrichea | Strobilidiidae | 0±0 | 0±0 | 0±0 | 0±0 | 0±0 | 0±0 | 0±0 | 0±0 | 0±0 |
| Gyrista | Chrysophyceae | Lepidochromonadaceae | 0±0 | 0±0 | 0±0 | 0±0 | 0±0 | 0±0 | 0±0 | 0±0 | 0±0 |
| Cryptophyta_X | Cryptophyceae | Hemiselmidaceae | 0±0 | 0±0 | 0±0 | 0±0 | 0±0 | 0±0 | 0±0 | 0±0 | 0±0 |
| Gyrista | Chrysophyceae | Paraphysomonadales_X | 0±0 | 0±0 | 0±0 | 0±0 | 0±0 | 0±0 | 0±0 | 0±0 | 0±0 |
| Fungi | Zoopagomycota | Harpellales | 0±0 | 0±0 | 0±0 | 0±0 | 0±0 | 0±0 | 0±0 | 0±0 | 0±0 |
| Metazoa | Ctenophora | Ctenophora_XX | 0±0 | 0±0 | 0±0 | 0±0 | 0±0 | 0±0 | 0±0 | 0±0 | 0±0 |
| Metazoa | Craniata | Polypteriformes | 0±0 | 0±0 | 0±0 | 0±0 | 0±0 | 0±0 | 0±0 | 0±0 | 0±0 |
| Cercozoa | Novel-clade-10-12 | NC12A-lineage | 0±0 | 0±0 | 0±0 | 0±0 | 0±0 | 0±0 | 0±0 | 0±0 | 0±0 |
| Fungi | Basidiomycota | Entorrhizales | 0±0 | 0±0 | 0±0 | 0±0 | 0±0 | 0±0 | 0±0 | 0±0 | 0±0 |
| Metazoa | Mollusca | Cephalopoda_X | 0±0 | 0±0 | 0±0 | 0±0 | 0±0 | 0±0 | 0±0 | 0±0 | 0.1±0 |
| Discoba_X | Discoba_XX | Andaluciidae | 0±0 | 0±0 | 0±0 | 0±0 | 0±0 | 0±0 | 0±0 | 0±0 | 0±0 |
| Metazoa | Mollusca | Vetigastropoda | 0±0 | 0±0 | 0±0 | 0±0 | 0±0 | 0±0 | 0±0 | 0±0 | 0±0 |
| Ciliophora | Oligohymenophorea | OLIGO2 | 0±0 | 0±0 | 0±0 | 0±0 | 0±0 | 0±0 | 0±0 | 0±0 | 0±0 |
| Fungi | Mucoromycota | Diversiporales | 0±0 | 0±0 | 0±0 | 0±0 | 0±0 | 0±0 | 0±0 | 0±0 | 0±0 |
| Radiolaria | RAD-B | RAD-B_X_Group-III | 0±0 | 0±0 | 0±0 | 0±0 | 0±0 | 0±0 | 0±0 | 0±0 | 0±0 |
| Discoba_X | Heterolobosea | Acrasidae | 0±0 | 0±0 | 0±0 | 0±0 | 0±0 | 0±0 | 0±0 | 0±0 | 0±0 |
| Fungi | Ascomycota | Lichinomycetes | 0±0 | 0±0 | 0±0 | 0±0 | 0±0 | 0±0 | 0±0 | 0±0 | 0±0 |
| Apicomplexa | Gregarinomorphea | Gregarinomorphea_XX | 0±0 | 0±0 | 0±0 | 0±0 | 0±0 | 0±0 | 0±0 | 0±0 | 0±0 |
| Discoba_X | Discoba_XX | Stygiellidae | 0±0 | 0±0 | 0±0 | 0±0 | 0±0 | 0±0 | 0±0 | 0±0 | 0±0 |
| Choanoflagellata | Choanoflagellatea | Choanoflagellata_XX_Clade-3 | 0±0 | 0±0 | 0±0 | 0±0 | 0±0 | 0±0 | 0±0 | 0±0 | 0±0 |
| Apicomplexa | Coccidiomorphea | Sarcocystidae | 0±0 | 0±0 | 0±0 | 0±0 | 0±0 | 0±0 | 0±0 | 0±0 | 0±0 |
| Choanoflagellata | Choanoflagellatea | Monosigidae_Group_B | 0±0 | 0±0 | 0±0 | 0±0 | 0±0 | 0±0 | 0±0 | 0±0 | 0±0 |
| Rhodophyta_X | Porphyridiophyceae | Porphyridiales_X | 0±0 | 0±0 | 0±0 | 0±0 | 0±0 | 0±0 | 0±0 | 0±0 | 0±0 |
| Dinoflagellata | Dinophyceae | Suessiaceae | 0±0 | 0±0 | 0±0 | 0±0 | 0±0 | 0±0 | 0±0 | 0±0 | 0±0 |
| Rhodophyta_X | Stylonematophyceae | Stylonemataceae | 0±0 | 0±0 | 0±0 | 0±0 | 0±0 | 0±0 | 0±0 | 0±0 | 0±0 |
| Apicomplexa | Coccidiomorphea | Calyptosporidae | 0±0 | 0±0 | 0±0 | 0±0 | 0±0 | 0±0 | 0±0 | 0±0 | 0±0 |
| Fungi | Zoopagomycota | Dimargaritaceae | 0±0 | 0±0 | 0±0 | 0±0 | 0±0 | 0±0 | 0±0 | 0±0 | 0±0 |
| Dinoflagellata | Dinophyceae | Pyrocystaceae | 0±0 | 0±0 | 0±0 | 0±0 | 0±0 | 0±0 | 0±0 | 0±0 | 0±0 |
| Apicomplexa | Gregarinomorphea | Stenophoridae | 0±0 | 0±0 | 0±0 | 0±0 | 0±0 | 0±0 | 0±0 | 0±0 | 0±0 |
| Choanoflagellata | Choanoflagellatea | Salpingoecidae_Group_C2 | 0±0 | 0±0 | 0±0 | 0±0 | 0±0 | 0±0 | 0±0 | 0±0 | 0±0 |
| Ciliophora | Oligohymenophorea | Frontoniidae_1 | 0±0 | 0±0 | 0±0 | 0±0 | 0±0 | 0±0 | 0±0 | 0±0 | 0±0 |
| Cercozoa | Filosa-Imbricatea | Euglyphidae | 0±0 | 0±0 | 0±0 | 0±0 | 0±0 | 0±0 | 0±0 | 0±0 | 0±0 |
| Gyrista | Phaeophyceae | Ectocarpales_X | 0±0 | 0±0 | 0±0 | 0±0 | 0±0 | 0±0 | 0±0 | 0±0 | 0±0 |
| Cercozoa | Filosa-Sarcomonadea | Dujardinidae | 0±0 | 0±0 | 0±0 | 0±0 | 0±0 | 0±0 | 0±0 | 0±0 | 0±0 |
| Bigyra | Sagenista | MAST-7 | 0±0 | 0±0 | 0±0 | 0±0 | 0±0 | 0±0 | 0±0 | 0±0 | 0±0 |
| Cercozoa | Filosa-Imbricatea | Thaumatomonadidae | 0±0 | 0±0 | 0±0 | 0±0 | 0±0 | 0±0 | 0±0 | 0±0 | 0±0 |
| Metazoa | Mollusca | Lucinoida | 0±0 | 0.1±0 | 0±0 | 0±0 | 0.1±0 | 0.1±0 | 0±0 | 0±0 | 0±0 |
| Metazoa | Platyhelminthes | Mediofusata | 0±0 | 0±0 | 0±0 | 0±0 | 0±0 | 0±0 | 0±0 | 0±0 | 0±0 |
| Apicomplexa | Gregarinomorphea | Polyplicariidae | 0±0 | 0±0 | 0±0 | 0±0 | 0±0 | 0±0 | 0±0 | 0±0 | 0±0 |
| Ichthyosporea | Ichthyophonida | Eccrinales | 0±0 | 0±0 | 0±0 | 0±0 | 0±0 | 0±0 | 0±0 | 0±0 | 0±0 |
| Cercozoa | Chlorarachniophyceae | Minorisa-lineage | 0±0 | 0±0 | 0±0 | 0±0 | 0±0 | 0±0 | 0±0 | 0±0 | 0±0 |
| Ciliophora | Spirotrichea | Undellidae | 0±0 | 0±0 | 0±0 | 0±0 | 0±0 | 0±0 | 0±0 | 0±0 | 0±0 |
| Bigyra | Bicoecea | Cafeteriaceae | 0±0 | 0±0 | 0±0 | 0±0 | 0±0 | 0±0 | 0±0 | 0±0 | 0±0 |
| Metazoa | Mollusca | Pectinoida | 0±0 | 0±0 | 0±0 | 0±0 | 0±0 | 0±0 | 0±0 | 0±0 | 0±0 |
| Perkinsea | Perkinsida | Perkinsidae | 0±0 | 0±0 | 0±0 | 0±0 | 0±0 | 0±0 | 0±0 | 0±0 | 0±0 |
| Fungi | Rozellomycota | Rozellomycota_XX | 0±0 | 0±0 | 0±0 | 0±0 | 0±0 | 0±0 | 0±0 | 0±0 | 0±0 |
| Fungi | Mucoromycota | Umbelopsidales | 0±0 | 0±0 | 0±0 | 0±0 | 0±0 | 0±0 | 0±0 | 0±0 | 0±0 |
| Ciliophora | Oligohymenophorea | Operculariidae | 0±0 | 0±0 | 0±0 | 0±0 | 0±0 | 0±0 | 0±0 | 0±0 | 0±0 |
| Ciliophora | Colpodea | Colpodida | 0±0 | 0±0 | 0±0 | 0±0 | 0±0 | 0±0 | 0±0 | 0±0 | 0±0 |
| Fungi | Basidiomycota | Pucciniomycotina_X | 0±0 | 0±0 | 0±0 | 0±0 | 0±0 | 0±0 | 0±0 | 0±0 | 0±0 |
| Dinoflagellata | Syndiniales | Dino-Group-I-Clade-5 | 0±0 | 0±0 | 0±0 | 0±0 | 0±0 | 0±0 | 0±0 | 0±0 | 0±0 |
| Preaxostyla | Preaxostyla_X | Oxymonadida_X | 0±0 | 0±0 | 0±0 | 0±0 | 0±0 | 0±0 | 0±0 | 0±0 | 0±0 |
| Fungi | Ascomycota | Neolectomycetes | 0±0 | 0±0 | 0±0 | 0±0 | 0±0 | 0±0 | 0±0 | 0±0 | 0±0 |
| Dinoflagellata | Syndiniales | Dino-Group-II-Clade-10-and-11 | 0±0 | 0±0 | 0±0 | 0±0 | 0±0 | 0±0 | 0±0 | 0±0 | 0±0 |
| Bigyra | Sagenista | MAST-9 | 0±0 | 0±0 | 0±0 | 0±0 | 0±0 | 0±0 | 0±0 | 0±0 | 0±0 |
| Cercozoa | Filosa-Sarcomonadea | Paracercomonadidae | 0±0 | 0±0 | 0±0 | 0±0 | 0±0 | 0±0 | 0±0 | 0±0 | 0±0 |
| Metazoa | Mollusca | Scaphopoda_X | 0±0 | 0±0 | 0±0 | 0±0 | 0±0 | 0±0 | 0±0 | 0±0 | 0±0 |
| Metazoa | Urochordata | Appendicularia | 0±0 | 0±0 | 0±0 | 0±0 | 0±0 | 0±0 | 0±0 | 0±0 | 0±0 |
| Ciliophora | Oligohymenophorea | Vaginicolidae | 0±0 | 0±0 | 0±0 | 0±0 | 0±0 | 0±0 | 0±0 | 0±0 | 0±0 |
| Chlorophyta_X | Mamiellophyceae | Crustomastigaceae | 0±0 | 0±0 | 0±0 | 0±0 | 0±0 | 0±0 | 0±0 | 0±0 | 0±0 |
| Ciliophora | CONThreeP | CONThreeP_XX | 0±0 | 0±0 | 0±0 | 0±0 | 0±0 | 0±0 | 0±0 | 0±0 | 0±0 |
| Radiolaria | Polycystinea | Liosphaeroidea_X | 0±0 | 0±0 | 0±0 | 0±0 | 0±0 | 0±0 | 0±0 | 0±0 | 0±0 |
| Ciliophora | Phyllopharyngea | PHYLL_4 | 0±0 | 0±0 | 0±0 | 0±0 | 0±0 | 0±0 | 0±0 | 0±0 | 0±0 |
| Chlorophyta_X | Trebouxiophyceae | Prasiolales_X | 0±0 | 0±0 | 0±0 | 0±0 | 0±0 | 0±0 | 0±0 | 0±0 | 0±0 |
| Metazoa | Gnathostomulida | Gnathostomulida_XX | 0±0 | 0±0 | 0±0 | 0±0 | 0±0 | 0±0 | 0±0 | 0±0 | 0±0 |
| Ancyromonadida_X | Ancyromonadida_XX | Ancyromonadida_Group-1 | 0±0 | 0±0 | 0±0 | 0±0 | 0±0 | 0±0 | 0±0 | 0±0 | 0±0 |
| Centroplasthelida_X | Panacanthocystida | Acanthocystidae | 0±0 | 0±0 | 0±0 | 0±0 | 0±0 | 0±0 | 0±0 | 0±0 | 0±0 |
| Choanoflagellata | Choanoflagellatea | Stephanoecidae_Group_I | 0±0 | 0±0 | 0±0 | 0±0 | 0±0 | 0±0 | 0±0 | 0±0 | 0±0 |
| Fungi | Ascomycota | Schizosaccharomycetes | 0±0 | 0±0 | 0±0 | 0±0 | 0±0 | 0±0 | 0±0 | 0±0 | 0±0 |
| Centroplasthelida_X | Centroplasthelida_XX | Centroplasthelida_XXXX | 0±0 | 0±0 | 0±0 | 0±0 | 0±0 | 0±0 | 0±0 | 0±0 | 0±0 |
| Ciliophora | Oligohymenophorea | OLIGO8_X | 0±0 | 0±0 | 0±0 | 0±0 | 0±0 | 0±0 | 0±0 | 0±0 | 0±0 |
| Fungi | Chytridiomycota | Ericiomycetaceae | 0±0 | 0±0 | 0±0 | 0±0 | 0±0 | 0±0 | 0±0 | 0±0 | 0±0 |
| Apicomplexa | Coccidiomorphea | Rhytidocystidae | 0±0 | 0±0 | 0±0 | 0±0 | 0±0 | 0±0 | 0±0 | 0±0 | 0±0 |
| Fungi | Chytridiomycota | Zygophlyctidaceae | 0±0 | 0±0 | 0±0 | 0±0 | 0±0 | 0±0 | 0±0 | 0±0 | 0±0 |
| Metazoa | Arthropoda | Protura | 0±0 | 0±0 | 0±0 | 0±0 | 0±0 | 0±0 | 0±0 | 0±0 | 0±0 |
| Dinoflagellata | Dinophyceae | Podolampadaceae | 0±0 | 0±0 | 0±0 | 0±0 | 0±0 | 0±0 | 0±0 | 0±0 | 0±0 |
| Ciliophora | Heterotrichea | Stentoridae | 0±0 | 0±0 | 0±0 | 0±0 | 0±0 | 0±0 | 0±0 | 0±0 | 0±0 |
| Bigyra | Bicoecea | Bicoecea_XX | 0±0 | 0±0 | 0±0 | 0±0 | 0±0 | 0±0 | 0±0 | 0±0 | 0±0 |
| Choanoflagellata | Choanoflagellatea | Choanoflagellatea_XX_Group_P | 0±0 | 0±0 | 0±0 | 0±0 | 0±0 | 0±0 | 0±0 | 0±0 | 0±0 |
| Gyrista | Eustigmatophyceae | Eustigmatophyceae_XX | 0±0 | 0±0 | 0±0 | 0±0 | 0±0 | 0±0 | 0±0 | 0±0 | 0±0 |
| Ichthyosporea | Ichthyophonida | Ichthyophonidae_Freshwater | 0±0 | 0±0 | 0±0 | 0±0 | 0±0 | 0±0 | 0±0 | 0±0 | 0±0 |
| Dinoflagellata | Syndiniales | Dino-Group-II-Clade-39 | 0±0 | 0±0 | 0±0 | 0±0 | 0±0 | 0±0 | 0±0 | 0±0 | 0±0 |
| Fungi | Chytridiomycota | Synchytriaceae | 0±0 | 0±0 | 0±0 | 0±0 | 0±0 | 0±0 | 0±0 | 0±0 | 0±0 |
| Choanoflagellata | Choanoflagellatea | Stephanoecidae_New_Choanos_8 | 0±0 | 0±0 | 0±0 | 0±0 | 0±0 | 0±0 | 0±0 | 0±0 | 0±0 |
| Radiolaria | Polycystinea | Astrosphaeridae | 0±0 | 0±0 | 0±0 | 0±0 | 0±0 | 0±0 | 0±0 | 0±0 | 0±0 |
| Fungi | Blastocladiomycota | Blastocladiomycetes | 0±0 | 0±0 | 0±0 | 0±0 | 0±0 | 0±0 | 0±0 | 0±0 | 0±0 |
| Metazoa | Mollusca | Nudibranchia | 0±0 | 0±0 | 0±0 | 0±0 | 0±0 | 0±0 | 0±0 | 0±0 | 0±0 |
| Radiolaria | RAD-B | RAD-B_X_Group-IV_X | 0±0 | 0±0 | 0±0 | 0±0 | 0±0 | 0±0 | 0±0 | 0±0 | 0±0 |
| Ciliophora | Spirotrichea | Urostylidae | 0±0 | 0±0 | 0±0 | 0±0 | 0±0 | 0±0 | 0±0 | 0±0 | 0±0 |
| Dinoflagellata | Dinophyceae | Amphidomataceae | 0±0 | 0±0 | 0±0 | 0±0 | 0±0 | 0±0 | 0±0 | 0±0 | 0±0 |
| Gyrista | Chrysophyceae | Synuraceae | 0±0 | 0±0 | 0±0 | 0±0 | 0±0 | 0±0 | 0±0 | 0±0 | 0±0 |
| Ciliophora | Plagiopylea | Plagiopylidae | 0±0 | 0±0 | 0±0 | 0±0 | 0±0 | 0±0 | 0±0 | 0±0 | 0±0 |
| Ciliophora | Oligohymenophorea | Astomatida | 0±0 | 0±0 | 0±0 | 0±0 | 0±0 | 0±0 | 0±0 | 0±0 | 0±0 |
| Chlorophyta_X | Trebouxiophyceae | Trebouxiophyceae_XX | 0±0 | 0±0 | 0±0 | 0±0 | 0±0 | 0±0 | 0±0 | 0±0 | 0±0 |
| Choanoflagellata | Choanoflagellatea | Acanthoecidae | 0±0 | 0±0 | 0±0 | 0±0 | 0±0 | 0±0 | 0±0 | 0±0 | 0±0 |
| Choanoflagellata | Choanoflagellatea | Stephanoecidae_Group_D | 0±0 | 0±0 | 0±0 | 0±0 | 0±0 | 0±0 | 0±0 | 0±0 | 0±0 |
| Metazoa | Arthropoda | Symphyla | 0±0 | 0±0 | 0±0 | 0±0 | 0±0 | 0±0 | 0±0 | 0±0 | 0±0 |
| Fungi | Mucoromycota | Mortierellaceae_X | 0±0 | 0±0 | 0±0 | 0±0 | 0±0 | 0±0 | 0±0 | 0±0 | 0±0 |
| Chlorophyta_X | Nephroselmidophyceae | Nephroselmidales_X | 0±0 | 0±0 | 0±0 | 0±0 | 0±0 | 0±0 | 0±0 | 0±0 | 0±0 |
| Ciliophora | Spirotrichea | TIN_05 | 0±0 | 0±0 | 0±0 | 0±0 | 0±0 | 0±0 | 0±0 | 0±0 | 0±0 |
| Dinoflagellata | Dinophyceae | Lingulodiniaceae | 0±0 | 0±0 | 0±0 | 0±0 | 0±0 | 0±0 | 0±0 | 0±0 | 0±0 |
| Ciliophora | Spirotrichea | Oligotrichida_X | 0±0 | 0±0 | 0±0 | 0±0 | 0±0 | 0±0 | 0±0 | 0±0 | 0±0 |
| Cercozoa | Filosa-Thecofilosea | Ventricleftida_X | 0±0 | 0±0 | 0±0 | 0±0 | 0±0 | 0±0 | 0±0 | 0±0 | 0±0 |
| Breviatea_X | Breviatea_XX | Subulatomonas-lineage | 0±0 | 0±0 | 0±0 | 0±0 | 0±0 | 0±0 | 0±0 | 0±0 | 0±0 |
| Ciliophora | Spirotrichea | TIN_13 | 0±0 | 0±0 | 0±0 | 0±0 | 0±0 | 0±0 | 0±0 | 0±0 | 0±0 |
| Gyrista | Chrysophyceae | Paraphysomonadales_Clade-EC1Ga | 0±0 | 0±0 | 0±0 | 0±0 | 0±0 | 0±0 | 0±0 | 0±0 | 0±0 |
| Chrompodellids | Colpodellidea | Colpodellida_CHR1 | 0±0 | 0±0 | 0±0 | 0±0 | 0±0 | 0±0 | 0±0 | 0±0 | 0±0 |
| Metazoa | Mollusca | Aplacophora_X | 0±0 | 0±0 | 0±0 | 0±0 | 0±0 | 0±0 | 0±0 | 0±0 | 0±0 |
| Cercozoa | Endomyxa | Penardia-lineage | 0±0 | 0±0 | 0±0 | 0±0 | 0±0 | 0±0 | 0±0 | 0±0 | 0±0 |
| Cercozoa | Filosa-Imbricatea | Thaumatomonadida_X | 0±0 | 0±0 | 0±0 | 0±0 | 0±0 | 0±0 | 0±0 | 0±0 | 0±0 |
| Chrompodellids | Colpodellidea | Alphamonaceae | 0±0 | 0±0 | 0±0 | 0±0 | 0±0 | 0±0 | 0±0 | 0±0 | 0±0 |
| Ciliophora | Spirotrichea | TIN_02 | 0±0 | 0±0 | 0±0 | 0±0 | 0±0 | 0±0 | 0±0 | 0±0 | 0±0 |
| Ciliophora | CONThreeP | Discotrichidae | 0±0 | 0±0 | 0±0 | 0±0 | 0±0 | 0±0 | 0±0 | 0±0 | 0±0 |
| Ciliophora | Litostomatea | Trichostomatia_X | 0±0 | 0±0 | 0±0 | 0±0 | 0±0 | 0±0 | 0±0 | 0±0 | 0±0 |
| Ciliophora | Spirotrichea | Pseudokeronopsidae | 0±0 | 0±0 | 0±0 | 0±0 | 0±0 | 0±0 | 0±0 | 0±0 | 0±0 |
| Radiolaria | Polycystinea | Spumellaria_1 | 0±0 | 0±0 | 0±0 | 0±0 | 0±0 | 0±0 | 0±0 | 0±0 | 0±0 |
| Bigyra | Bicoecea | Borokaceae | 0±0 | 0±0 | 0±0 | 0±0 | 0±0 | 0±0 | 0±0 | 0±0 | 0±0 |
| Metazoa | Platyhelminthes | Eucestoda | 0±0 | 0±0 | 0±0 | 0±0 | 0±0 | 0±0 | 0±0 | 0±0 | 0±0 |
| Chlorophyta_X | Ulvophyceae | Cladophorales_X | 0±0 | 0±0 | 0±0 | 0±0 | 0±0 | 0±0 | 0±0 | 0±0 | 0±0 |
| Dinoflagellata | Syndiniales | Dino-Group-II-Clade-35 | 0±0 | 0±0 | 0±0 | 0±0 | 0±0 | 0±0 | 0±0 | 0±0 | 0±0 |
| Metazoa | Platyhelminthes | Monopisthocotylea | 0±0 | 0±0 | 0±0 | 0±0 | 0±0 | 0±0 | 0±0 | 0±0 | 0±0 |
| Metazoa | Platyhelminthes | Macrostomorpha | 0±0 | 0±0 | 0±0 | 0±0 | 0±0 | 0±0 | 0±0 | 0±0 | 0±0 |
| Gyrista | Bacillariophyceae | Koernerellacae | 0±0 | 0±0 | 0±0 | 0±0 | 0±0 | 0±0 | 0±0 | 0±0 | 0±0 |
| Dinoflagellata | Syndiniales | Dino-Group-I-Clade-7 | 0±0 | 0±0 | 0±0 | 0±0 | 0±0 | 0±0 | 0±0 | 0±0 | 0±0 |
| Streptophyta_X | Mesostigmatophyceae | Mesostigmatophyceae_XX | 0±0 | 0±0 | 0±0 | 0±0 | 0±0 | 0±0 | 0±0 | 0±0 | 0±0 |
| Stramenopiles_X | Stramenopiles_XX | Stramenopiles_XXXX | 0±0 | 0±0 | 0±0 | 0±0 | 0±0 | 0±0 | 0±0 | 0±0 | 0±0 |
| Dinoflagellata | Dinophyceae | Ceratiaceae | 0±0 | 0±0 | 0±0 | 0±0 | 0±0 | 0±0 | 0±0 | 0±0 | 0±0 |
| Metazoa | Arthropoda | Arthropoda_XX | 0±0 | 0±0 | 0±0 | 0±0 | 0±0 | 0±0 | 0±0 | 0±0 | 0±0 |
| Metazoa | Myzostomida | Myzostomida_XX | 0±0 | 0±0 | 0±0 | 0±0 | 0±0 | 0±0 | 0±0 | 0±0 | 0±0 |
| Metazoa | Mollusca | Pleurobranchia | 0±0 | 0±0 | 0±0 | 0±0 | 0±0 | 0±0 | 0±0 | 0±0 | 0±0 |
| Cercozoa | Filosa-Granofilosea | Novel-Gran-5 | 0±0 | 0±0 | 0±0 | 0±0 | 0±0 | 0±0 | 0±0 | 0±0 | 0±0 |
| Ciliophora | Spirotrichea | Hypotrichia_X | 0±0 | 0±0 | 0±0 | 0±0 | 0±0 | 0±0 | 0±0 | 0±0 | 0±0 |
| Streptophyta_X | Coleochaetophyceae | Coleochaetophyceae_XX | 0±0 | 0±0 | 0±0 | 0±0 | 0±0 | 0±0 | 0±0 | 0±0 | 0±0 |
| Gyrista | Pelagophyceae | Sarcinochrysidaceae | 0±0 | 0±0 | 0±0 | 0±0 | 0±0 | 0±0 | 0±0 | 0±0 | 0±0 |
| Cercozoa | Endomyxa-Ascetosporea | Paradinida_X | 0±0 | 0±0 | 0±0 | 0±0 | 0±0 | 0±0 | 0±0 | 0±0 | 0±0 |
| Ciliophora | Spirotrichea | Xystonellidae | 0±0 | 0±0 | 0±0 | 0±0 | 0±0 | 0±0 | 0±0 | 0±0 | 0±0 |
| Choanoflagellata | Choanoflagellatea | Monosigidae_Group_O | 0±0 | 0±0 | 0±0 | 0±0 | 0±0 | 0±0 | 0±0 | 0±0 | 0±0 |
| Metazoa | Nematomorpha | Nematomorpha_XX | 0±0 | 0±0 | 0±0 | 0±0 | 0±0 | 0±0 | 0±0 | 0±0 | 0±0 |

Table S5: Average relative abundance (± Standard Error of the Mean) of all community classes across all sediment samples (All), and across seasons (Aug = August, Dec = December, Mar = March, May = May) and stations sampled (Shelf S = Shelf South, Shelf N = Shelf North, Break = Shelf Break, Basin = Nansen Basin).

| **Subdivision** | **Class** | **All±SE** | **Aug±SE** | **Dec±SE** | **Mar±SE** | **May±SE** | **ShelfS±SE** | **ShelfN±SE** | **Break±SE** |
| --- | --- | --- | --- | --- | --- | --- | --- | --- | --- |
| Gyrista | Mediophyceae | 42.2±6.2 | 58.4±10.6 | 5.7±1.8 | 50.4±10.5 | 25±5.9 | 83.2±3.1 | 18.2±4.5 | 47.3±9.4 |
| Dinoflagellata | Dinophyceae | 15.7±2.9 | 16.8±6.3 | 20.4±5.3 | 15.4±4.6 | 12.2±4.8 | 8.5±1.9 | 27.1±4.2 | 4.1±1.7 |
| Metazoa | Nemertea | 2.6±2.6 | 0±0 | 22.7±18.5 | 0±0 | 0±0 | 0±0 | 5.7±5.4 | 0±0 |
| Metazoa | Nematoda | 5.7±2 | 4.4±1.2 | 2.3±0.9 | 3.7±1.4 | 12±7.6 | 0.4±0.2 | 4.4±1 | 11.7±5.6 |
| Bigyra | Sagenista | 3.3±0.7 | 1.1±0.4 | 0.6±0.3 | 4.1±1.2 | 6.9±1.6 | 0.3±0.1 | 2.8±0.7 | 6.3±1.5 |
| Metazoa | Arthropoda | 2.8±1.3 | 0.5±0.2 | 8.8±1.9 | 0.5±0.2 | 6.3±4.7 | 0.5±0.2 | 3.1±1.1 | 4.1±3.7 |
| Metazoa | Mollusca | 2.5±1.3 | 0.1±0.1 | 4.9±3.3 | 2.4±2.1 | 5±4.5 | 0.4±0.2 | 2.7±1.7 | 3.7±3.5 |
| Chlorophyta_X | Pyramimonadophyceae | 2.3±0.8 | 2.4±1.7 | 4.4±1.9 | 0.9±0.3 | 2.9±1.4 | 0.1±0 | 4.8±1.3 | 0.1±0.1 |
| Perkinsea | Perkinsida | 3.5±0.9 | 3.8±1.8 | 1±0.4 | 4.7±1.8 | 2.7±1 | 1.4±0.6 | 1.9±0.9 | 7.5±1.8 |
| Ciliophora | Spirotrichea | 1.8±0.4 | 1.7±0.4 | 3.1±1.5 | 1.9±0.6 | 1.3±0.8 | 1.1±0.2 | 3±0.6 | 0.6±0.3 |
| Gyrista | Bacillariophyceae | 1.3±0.3 | 2.3±0.7 | 2.6±0.9 | 0.4±0.1 | 0.4±0.2 | 1.7±0.7 | 1.9±0.5 | 0.1±0 |
| Gyrista | Gyrista_X | 0.5±0.1 | 0.2±0.1 | 0.5±0.2 | 0.8±0.3 | 0.6±0.3 | 0.3±0.1 | 0.9±0.2 | 0±0 |
| Metazoa | Annelida | 1.2±0.6 | 0±0 | 5.6±2.2 | 0±0 | 2.3±1.5 | 0±0 | 1.5±0.9 | 1.6±1.2 |
| Fungi | Chytridiomycota | 4.2±0.9 | 1.8±0.7 | 8.2±3.7 | 3.2±1 | 6.9±1.9 | 0.4±0.1 | 7.5±1.3 | 1.9±0.3 |
| Dinoflagellata | Syndiniales | 3.7±0.7 | 1.4±0.5 | 3.7±1 | 4.4±1.3 | 6.3±1.5 | 0.5±0.2 | 4.7±0.7 | 4.7±1.5 |
| Chlorophyta_X | Mamiellophyceae | 1.3±0.3 | 0.2±0.1 | 0.8±0.4 | 2±0.7 | 2.3±0.8 | 0.1±0 | 2.4±0.5 | 0.6±0.2 |
| Metazoa | Kinorhyncha | 0.5±0.3 | 1±0.7 | 0.9±0.6 | 0.1±0.1 | 0±0 | 0.1±0.1 | 1±0.5 | 0±0 |
| Metazoa | Metazoa_X | 0.5±0.2 | 0.3±0.1 | 0.2±0.1 | 0.4±0.3 | 1.1±0.6 | 0±0 | 0.6±0.2 | 0.9±0.4 |
| Metazoa | Platyhelminthes | 0.5±0.3 | 0.7±0.6 | 0.1±0 | 0.6±0.4 | 0.2±0.2 | 0±0 | 0.6±0.3 | 0.8±0.7 |
| Gyrista | Chrysophyceae | 0.4±0.1 | 0.4±0.1 | 0.6±0.3 | 0.4±0.1 | 0.5±0.2 | 0.1±0 | 0.4±0.1 | 0.7±0.1 |
| Gyrista | Pelagophyceae | 0.1±0.1 | 0.2±0.1 | 0.1±0.1 | 0±0 | 0±0 | 0±0 | 0.2±0.1 | 0±0 |
| Stramenopiles_X | Stramenopiles_XX | 0.1±0 | 0.1±0 | 0±0 | 0.1±0.1 | 0.1±0 | 0±0 | 0±0 | 0.2±0.1 |
| Metazoa | Cnidaria | 0.3±0.2 | 0.3±0.2 | 1.5±1 | 0.2±0.1 | 0±0 | 0±0 | 0.7±0.3 | 0±0 |
| Cercozoa | Filosa-Thecofilosea | 0.2±0.1 | 0.1±0.1 | 0.1±0.1 | 0.3±0.1 | 0.3±0.1 | 0±0 | 0.4±0.1 | 0.2±0.1 |
| Gyrista | Pirsoniales | 0.2±0.1 | 0.2±0.1 | 0.1±0.1 | 0.3±0.1 | 0.3±0.2 | 0±0 | 0.4±0.1 | 0.1±0 |
| Rotosphaerida | Rotosphaerida_X | 0.2±0.1 | 0.3±0.2 | 0±0 | 0.3±0.1 | 0.2±0.1 | 0±0 | 0.2±0.1 | 0.4±0.2 |
| Gyrista | Coscinodiscophyceae | 0±0 | 0±0 | 0.1±0.1 | 0.1±0 | 0±0 | 0.1±0 | 0±0 | 0±0 |
| Telonemia_X | Telonemia_XX | 0.2±0 | 0.1±0 | 0.1±0 | 0.2±0.1 | 0.2±0.1 | 0±0 | 0.1±0.1 | 0.3±0.1 |
| Apusomonada_X | Apusomonadidae | 0.2±0.1 | 0.2±0 | 0.1±0 | 0.5±0.2 | 0.2±0.1 | 0±0 | 0.2±0.1 | 0.5±0.2 |
| Cercozoa | Filosa-Imbricatea | 0.1±0 | 0.1±0 | 0±0 | 0.1±0.1 | 0.2±0.1 | 0.1±0 | 0±0 | 0.3±0.1 |
| Gyrista | Bolidophyceae | 0.1±0 | 0±0 | 0±0 | 0.1±0 | 0.1±0.1 | 0±0 | 0±0 | 0.2±0 |
| Chrompodellids | Colpodellidea | 0±0 | 0±0 | 0±0 | 0±0 | 0.1±0 | 0±0 | 0±0 | 0.1±0 |
| Chlorophyta_X | Trebouxiophyceae | 0.1±0 | 0.1±0 | 0.1±0 | 0.1±0 | 0.1±0 | 0±0 | 0.1±0 | 0.1±0 |
| Prasinodermophyta_X | Prasinodermophyceae | 0.1±0 | 0±0 | 0±0 | 0.1±0.1 | 0.1±0.1 | 0±0 | 0.2±0.1 | 0±0 |
| Bigyra | Opalozoa | 0±0 | 0±0 | 0±0 | 0.1±0.1 | 0±0 | 0±0 | 0.1±0 | 0±0 |
| Metazoa | Gastrotricha | 0±0 | 0±0 | 0±0 | 0.1±0 | 0±0 | 0.1±0 | 0±0 | 0±0 |
| Chlorophyta_X | Chlorophyceae | 0±0 | 0.1±0 | 0±0 | 0±0 | 0±0 | 0±0 | 0±0 | 0.1±0 |
| Opisthokonta_X | Opisthokonta_XX | 0.1±0 | 0.1±0 | 0±0 | 0.1±0.1 | 0±0 | 0.1±0 | 0.1±0 | 0.1±0 |
| Radiolaria | Acantharea | 0±0 | 0±0 | 0±0 | 0±0 | 0±0 | 0±0 | 0±0 | 0±0 |
| Gyrista | Peronosporomycetes | 0.1±0.1 | 0±0 | 0.1±0 | 0.1±0.1 | 0.3±0.2 | 0±0 | 0.3±0.1 | 0±0 |
| Apicomplexa | Coccidiomorphea | 0.1±0 | 0.1±0 | 0±0 | 0±0 | 0.1±0 | 0±0 | 0±0 | 0.1±0 |
| Ciliophora | Oligohymenophorea | 0±0 | 0±0 | 0±0 | 0±0 | 0±0 | 0±0 | 0±0 | 0±0 |
| Centroplasthelida_X | Centroplasthelida_XX | 0±0 | 0±0 | 0±0 | 0±0 | 0±0 | 0±0 | 0±0 | 0±0 |
| Cercozoa | Endomyxa-Phytomyxea | 0±0 | 0±0 | 0±0 | 0±0 | 0±0 | 0±0 | 0±0 | 0±0 |
| Chlorophyta_X | Prasino-Clade-VIII | 0±0 | 0±0 | 0±0 | 0±0 | 0±0 | 0±0 | 0±0 | 0±0 |
| Centroplasthelida_X | Pterocystida | 0±0 | 0±0 | 0±0 | 0±0 | 0±0 | 0±0 | 0±0 | 0±0 |
| Cryptophyta_X:nucl | Cryptophyceae:nucl | 0±0 | 0±0 | 0±0 | 0±0 | 0±0 | 0±0 | 0±0 | 0±0 |
| Stramenopiles_X | Stramenopiles_X-Group-2 | 0±0 | 0±0 | 0±0 | 0±0 | 0±0 | 0±0 | 0±0 | 0±0 |
| Breviatea_X | Breviatea_XX | 0±0 | 0±0 | 0±0 | 0±0 | 0±0 | 0±0 | 0±0 | 0±0 |
| Chlorophyta_X | Chlorophyta_XX | 0±0 | 0±0 | 0±0 | 0±0 | 0±0 | 0±0 | 0±0 | 0±0 |
| Kathablepharida | Kathablepharidea | 0±0 | 0±0 | 0±0 | 0±0 | 0±0 | 0±0 | 0±0 | 0±0 |
| Gyrista | Developea | 0±0 | 0±0 | 0±0 | 0±0 | 0±0 | 0±0 | 0±0 | 0±0 |
| Bigyra | Bicoecea | 0±0 | 0±0 | 0±0 | 0±0 | 0±0 | 0±0 | 0±0 | 0±0 |
| Choanoflagellata | Choanoflagellatea | 0±0 | 0±0 | 0±0 | 0±0 | 0±0 | 0±0 | 0±0 | 0.1±0 |
| Metazoa | Craniata | 0±0 | 0±0 | 0±0 | 0±0 | 0±0 | 0±0 | 0±0 | 0±0 |
| Gyrista | Hyphochytriomyceta | 0±0 | 0±0 | 0±0 | 0±0 | 0±0 | 0±0 | 0±0 | 0±0 |
| Metazoa | Echinodermata | 0±0 | 0±0 | 0.2±0.1 | 0±0 | 0±0 | 0±0 | 0±0 | 0±0 |
| Fungi | Blastocladiomycota | 0±0 | 0±0 | 0±0 | 0±0 | 0±0 | 0±0 | 0±0 | 0±0 |
| Radiolaria | Polycystinea | 0±0 | 0±0 | 0±0 | 0±0 | 0±0 | 0±0 | 0±0 | 0±0 |
| Ichthyosporea | Ichthyophonida | 0±0 | 0±0 | 0±0 | 0±0 | 0±0 | 0±0 | 0±0 | 0±0 |
| Ciliophora | Phyllopharyngea | 0±0 | 0±0 | 0±0 | 0±0 | 0±0 | 0±0 | 0±0 | 0±0 |
| Evosea_X | Variosea | 0±0 | 0±0 | 0±0 | 0±0 | 0±0 | 0±0 | 0±0 | 0±0 |
| Fungi | Mucoromycota | 0.4±0.4 | 0±0 | 0±0 | 0±0 | 1.6±1.4 | 0±0 | 0.8±0.7 | 0±0 |
| Dinoflagellata | Dinophyta_X | 0±0 | 0±0 | 0±0 | 0±0 | 0±0 | 0±0 | 0±0 | 0±0 |
| Tubulinea_X | Elardia | 0±0 | 0±0 | 0±0 | 0±0 | 0±0 | 0±0 | 0±0 | 0±0 |
| Gyrista | MOCH-2 | 0±0 | 0±0 | 0±0 | 0±0 | 0.1±0 | 0±0 | 0±0 | 0±0 |
| Haptophyta_X | Prymnesiophyceae | 0.3±0.3 | 0±0 | 0±0 | 0.1±0 | 1.2±1.1 | 0.1±0 | 0.6±0.6 | 0±0 |
| Radiolaria | RAD-A | 0±0 | 0±0 | 0±0 | 0±0 | 0±0 | 0±0 | 0±0 | 0±0 |
| Rhodophyta_X | Florideophyceae | 0±0 | 0±0 | 0±0 | 0±0 | 0±0 | 0±0 | 0±0 | 0±0 |
| Cercozoa | Endomyxa-Ascetosporea | 0±0 | 0±0 | 0±0 | 0±0 | 0±0 | 0±0 | 0±0 | 0±0 |
| Nebulidia_X | Nebulidea | 0±0 | 0±0 | 0±0 | 0±0 | 0±0 | 0±0 | 0±0 | 0±0 |
| Fornicata | Carpediemonadea | 0±0 | 0±0 | 0±0 | 0±0 | 0±0 | 0±0 | 0±0 | 0±0 |
| Picozoa_X | Picozoa_XX | 0±0 | 0±0 | 0±0 | 0±0 | 0±0 | 0±0 | 0±0 | 0±0 |
| Ichthyosporea | Dermocystida | 0±0 | 0±0 | 0±0 | 0±0 | 0±0 | 0±0 | 0±0 | 0±0 |
| Cercozoa | Endomyxa | 0±0 | 0±0 | 0±0 | 0.1±0 | 0.1±0 | 0±0 | 0±0 | 0±0 |
| Metazoa | Porifera | 0±0 | 0±0 | 0±0 | 0±0 | 0±0 | 0±0 | 0±0 | 0±0 |
| Rhodophyta_X | Compsopogonophyceae | 0±0 | 0±0 | 0±0 | 0±0 | 0±0 | 0±0 | 0±0 | 0±0 |
| Cercozoa | Filosa-Granofilosea | 0±0 | 0±0 | 0±0 | 0±0 | 0±0 | 0±0 | 0±0 | 0±0 |
| Chlorophyta_X | Chloropicophyceae | 0±0 | 0±0 | 0±0 | 0±0 | 0±0 | 0±0 | 0±0 | 0±0 |
| Cryptophyta_X | Cryptophyceae | 0±0 | 0±0 | 0±0 | 0±0 | 0±0 | 0±0 | 0±0 | 0±0 |
| Ancyromonadida_X | Ancyromonadida_XX | 0±0 | 0±0 | 0±0 | 0±0 | 0±0 | 0±0 | 0±0 | 0±0 |
| Fungi | Fungi_X | 0±0 | 0±0 | 0±0 | 0±0 | 0±0 | 0±0 | 0±0 | 0±0 |
| Metazoa | Bryozoa | 0±0 | 0±0 | 0±0 | 0±0 | 0±0 | 0±0 | 0±0 | 0±0 |
| Metazoa | Rotifera | 0±0 | 0±0 | 0±0 | 0±0 | 0±0 | 0±0 | 0±0 | 0±0 |
| Fungi | Rozellomycota | 0±0 | 0±0 | 0±0 | 0±0 | 0±0 | 0±0 | 0±0 | 0±0 |
| Fungi | Basidiomycota | 0±0 | 0±0 | 0±0 | 0±0 | 0±0 | 0±0 | 0±0 | 0±0 |
| Radiolaria | RAD-B | 0±0 | 0±0 | 0±0 | 0±0 | 0±0 | 0±0 | 0±0 | 0±0 |

Table S6: Average relative abundance (± Standard Error of the Mean) of all community families across all sediment samples (All), and across seasons (Aug = August, Dec = December, Mar = March, May = May) and stations sampled (Shelf S = Shelf South, Shelf N = Shelf North, Break = Shelf Break, Basin = Nansen Basin).

| **Subdivision** | **Class** | **Family** | **All±SE** | **Aug±SE** | **Dec±SE** | **Mar±SE** | **May±SE** | **ShelfS±SE** | **ShelfN±SE** | **Basin±SE** |
| --- | --- | --- | --- | --- | --- | --- | --- | --- | --- | --- |
| Gyrista | Mediophyceae | Chaetocerotaceae | 40.4±6.4 | 57.4±10.8 | 3.8±1.1 | 48.5±11 | 22.4±5.8 | 82.3±3.1 | 15±4.4 | 47.2±9.4 |
| Dinoflagellata | Dinophyceae | Dinophyceae_XX | 7.6±1.6 | 9.2±3.9 | 9.9±2.2 | 6.5±1.8 | 5.4±2.5 | 2.9±1.1 | 12.6±2.6 | 3.6±1.7 |
| Metazoa | Nemertea | Nemertea_XX | 2.6±2.6 | 0±0 | 22.7±18.5 | 0±0 | 0±0 | 0±0 | 5.7±5.4 | 0±0 |
| Metazoa | Nematoda | Chromadorea_X | 5.4±1.9 | 3.8±1 | 2.1±0.8 | 3.5±1.2 | 11.9±7.5 | 0.4±0.2 | 3.8±0.8 | 11.4±5.6 |
| Bigyra | Sagenista | Oblongichytridiaceae | 2.4±0.6 | 1±0.3 | 0.3±0.2 | 2.5±0.9 | 5.6±1.7 | 0.2±0 | 1.4±0.3 | 5.7±1.3 |
| Dinoflagellata | Dinophyceae | Pyrocystaceae | 0.8±0.3 | 1.2±0.6 | 0.1±0 | 1.2±0.7 | 0±0 | 3.3±0.7 | 0±0 | 0±0 |
| Metazoa | Arthropoda | Ostracoda | 2.1±1.2 | 0.1±0.1 | 5.4±1.1 | 0.2±0.1 | 6.1±4.8 | 0.1±0 | 1.9±0.7 | 4±3.7 |
| Metazoa | Mollusca | Protobranchia | 2±1.3 | 0.1±0.1 | 0.6±0.5 | 2.4±2.1 | 5±4.5 | 0.4±0.2 | 1.6±1.4 | 3.7±3.5 |
| Chlorophyta_X | Pyramimonadophyceae | Pyramimonadales_X | 1.2±0.6 | 2.2±1.6 | 3.1±1.3 | 0.1±0 | 0.2±0.1 | 0±0 | 2.5±1.2 | 0±0 |
| Perkinsea | Perkinsida | Perkinsida_XX | 3.2±0.9 | 3.6±1.8 | 0.7±0.3 | 4±1.8 | 2.5±1 | 0.8±0.3 | 1.5±1 | 7.4±1.7 |
| Dinoflagellata | Dinophyceae | Suessiaceae | 1.7±0.6 | 2.4±1.5 | 3.7±1.5 | 1.1±0.5 | 0.4±0.3 | 0.3±0.1 | 3.5±1.1 | 0±0 |
| Dinoflagellata | Dinophyceae | Amphidiniopsidaceae | 0.9±0.5 | 1.5±1.1 | 1.3±0.5 | 0.8±0.7 | 0±0 | 0.2±0.1 | 1.9±0.9 | 0±0 |
| Ciliophora | Spirotrichea | Hypotrichia_X | 0.7±0.2 | 0.7±0.3 | 1.4±0.4 | 0.9±0.3 | 0±0 | 0.3±0.1 | 1.2±0.3 | 0.3±0.2 |
| Dinoflagellata | Dinophyceae | Thoracosphaeraceae | 2±0.5 | 0.9±0.3 | 2.1±0.5 | 3.2±1.3 | 2±1.3 | 1.1±0.4 | 3.6±1 | 0.1±0 |
| Dinoflagellata | Syndiniales | Dino-Group-I-Clade-2 | 1.5±0.4 | 0.4±0.1 | 0.3±0.1 | 2.2±0.8 | 2.7±0.8 | 0.1±0.1 | 1.5±0.4 | 2.5±0.9 |
| Dinoflagellata | Dinophyceae | Heterocapsaceae | 0.5±0.2 | 0.5±0.4 | 1.4±0.7 | 0.4±0.2 | 0.2±0.1 | 0.1±0 | 1.1±0.3 | 0±0 |
| Gyrista | Bacillariophyceae | Naviculaceae | 0.6±0.2 | 1.1±0.4 | 1.4±0.5 | 0.2±0.1 | 0.1±0.1 | 0.7±0.3 | 1±0.3 | 0±0 |
| Gyrista | Mediophyceae | Thalassiosiraceae | 1.5±0.4 | 0.7±0.3 | 1.7±0.7 | 1.7±0.9 | 2.5±1 | 0.6±0.2 | 3±0.7 | 0±0 |
| Gyrista | Gyrista_X | MAST-1 | 0.5±0.1 | 0.2±0.1 | 0.5±0.2 | 0.8±0.3 | 0.6±0.3 | 0.3±0.1 | 0.9±0.2 | 0±0 |
| Metazoa | Annelida | Annelida_XX | 1.2±0.6 | 0±0 | 5.6±2.2 | 0±0 | 2.3±1.5 | 0±0 | 1.5±0.9 | 1.6±1.2 |
| Fungi | Chytridiomycota | Chytridiomycota_XX | 3.9±0.9 | 1.7±0.6 | 8.2±3.7 | 2.8±1 | 6.7±1.9 | 0.4±0.1 | 7.4±1.3 | 1.4±0.3 |
| Dinoflagellata | Syndiniales | Dino-Group-I-Clade-1 | 1.3±0.3 | 0.6±0.2 | 1.4±0.4 | 1.2±0.3 | 2.3±0.9 | 0.2±0.1 | 2±0.5 | 1.1±0.3 |
| Dinoflagellata | Dinophyceae | Gymnodiniaceae | 1.9±0.5 | 0.7±0.3 | 1.4±0.5 | 1.9±0.9 | 3.8±1.7 | 0.4±0.1 | 3.8±0.9 | 0.1±0.1 |
| Bigyra | Sagenista | MAST-9 | 0.7±0.2 | 0±0 | 0±0 | 1.3±0.4 | 1.1±0.4 | 0.1±0 | 1.1±0.4 | 0.5±0.2 |
| Chlorophyta_X | Mamiellophyceae | Mamiellaceae | 0.6±0.1 | 0.1±0.1 | 0.6±0.3 | 1.1±0.3 | 0.8±0.3 | 0.1±0 | 1±0.2 | 0.5±0.2 |
| Metazoa | Kinorhyncha | Kinorhyncha_XX | 0.5±0.3 | 1±0.7 | 0.9±0.6 | 0.1±0.1 | 0±0 | 0.1±0.1 | 1±0.5 | 0±0 |
| Metazoa | Metazoa_X | Metazoa_XXX | 0.5±0.2 | 0.3±0.1 | 0.2±0.1 | 0.4±0.3 | 1.1±0.6 | 0±0 | 0.6±0.2 | 0.9±0.4 |
| Ciliophora | Spirotrichea | Strombidiidae | 0.7±0.2 | 0.7±0.1 | 1.2±0.7 | 0.6±0.2 | 0.8±0.4 | 0.7±0.2 | 1.1±0.3 | 0.2±0.1 |
| Gyrista | Mediophyceae | Mediophyceae_XX | 0.2±0 | 0.2±0 | 0.1±0.1 | 0.2±0.1 | 0±0 | 0.3±0 | 0.2±0 | 0±0 |
| Gyrista | Bacillariophyceae | Bacillariaceae | 0.3±0.1 | 0.4±0.2 | 0.7±0.3 | 0.1±0 | 0.2±0.1 | 0.3±0.2 | 0.5±0.1 | 0±0 |
| Perkinsea | Perkinsida | Parviluciferaceae | 0.1±0.1 | 0±0 | 0.1±0 | 0.4±0.2 | 0±0 | 0.5±0.3 | 0.1±0 | 0±0 |
| Metazoa | Arthropoda | Maxillopoda | 0.7±0.2 | 0.4±0.2 | 3.4±0.9 | 0.4±0.2 | 0.2±0.1 | 0.4±0.2 | 1.1±0.5 | 0.1±0.1 |
| Metazoa | Mollusca | Carditoida | 0.5±0.5 | 0±0 | 4.4±3.6 | 0±0 | 0±0 | 0±0 | 1.1±1 | 0±0 |
| Gyrista | Bacillariophyceae | Bacillariophyceae_XX | 0.3±0.1 | 0.5±0.1 | 0.5±0.2 | 0.1±0 | 0.1±0.1 | 0.4±0.2 | 0.4±0.1 | 0±0 |
| Dinoflagellata | Syndiniales | Dino-Group-II-Clade-15 | 0.2±0.1 | 0.1±0 | 0±0 | 0.3±0.2 | 0.4±0.2 | 0±0 | 0±0 | 0.6±0.2 |
| Chlorophyta_X | Pyramimonadophyceae | Pyramimonadaceae | 0.6±0.3 | 0.2±0.1 | 1.3±0.6 | 0.4±0.2 | 1.3±1 | 0±0 | 1.4±0.5 | 0.1±0 |
| Metazoa | Nematoda | Enoplea_X | 0.4±0.2 | 0.7±0.4 | 0.2±0.2 | 0.3±0.2 | 0.1±0.1 | 0.1±0.1 | 0.6±0.4 | 0.3±0.1 |
| Metazoa | Cnidaria | Anthozoa | 0.1±0.1 | 0.3±0.3 | 0±0 | 0±0 | 0±0 | 0±0 | 0.2±0.2 | 0±0 |
| Metazoa | Platyhelminthes | Rhabdocoela | 0.3±0.2 | 0.7±0.6 | 0.1±0 | 0.1±0.1 | 0±0 | 0±0 | 0.1±0 | 0.7±0.7 |
| Gyrista | Chrysophyceae | Paraphysomonadaceae | 0.1±0 | 0.1±0.1 | 0±0 | 0.1±0.1 | 0.2±0.1 | 0±0 | 0.1±0 | 0.4±0.1 |
| Fungi | Chytridiomycota | Chytridiales_X | 0.1±0.1 | 0.1±0 | 0±0 | 0.3±0.2 | 0.1±0 | 0±0 | 0±0 | 0.4±0.1 |
| Gyrista | Pelagophyceae | Sarcinochrysidaceae | 0.1±0.1 | 0.2±0.1 | 0.1±0 | 0±0 | 0±0 | 0±0 | 0.1±0.1 | 0±0 |
| Stramenopiles_X | Stramenopiles_XX | Stramenopiles_XXXX | 0.1±0 | 0.1±0 | 0±0 | 0.1±0.1 | 0.1±0 | 0±0 | 0±0 | 0.2±0.1 |
| Ciliophora | Spirotrichea | TIN_03 | 0.2±0.1 | 0±0 | 0.3±0.2 | 0.1±0.1 | 0.4±0.3 | 0±0 | 0.4±0.2 | 0±0 |
| Dinoflagellata | Syndiniales | Dino-Group-II-Clade-10-and-11 | 0.4±0.1 | 0.1±0.1 | 1.4±0.3 | 0.3±0.1 | 0.3±0.1 | 0.1±0 | 0.7±0.2 | 0.1±0 |
| Dinoflagellata | Dinophyceae | Peridiniaceae | 0.1±0.1 | 0.1±0.1 | 0.3±0.2 | 0±0 | 0.1±0 | 0±0 | 0.2±0.1 | 0±0 |
| Metazoa | Cnidaria | Hydrozoa | 0.2±0.2 | 0±0 | 1.5±1 | 0.1±0.1 | 0±0 | 0±0 | 0.5±0.3 | 0±0 |
| Cercozoa | Filosa-Thecofilosea | CCW10-lineage | 0.1±0 | 0.1±0 | 0.1±0 | 0.1±0.1 | 0.1±0.1 | 0±0 | 0.2±0 | 0.1±0 |
| Dinoflagellata | Syndiniales | Dino-Group-II-Clade-7 | 0.1±0 | 0.1±0.1 | 0±0 | 0.1±0 | 0.1±0.1 | 0±0 | 0±0 | 0.2±0.1 |
| Gyrista | Chrysophyceae | Lepidochromonadaceae | 0±0 | 0±0 | 0±0 | 0.1±0 | 0.1±0 | 0±0 | 0±0 | 0.1±0 |
| Gyrista | Chrysophyceae | Ochromonadales_X | 0.1±0 | 0.1±0 | 0.5±0.2 | 0±0 | 0.1±0.1 | 0±0 | 0.2±0.1 | 0.1±0.1 |
| Gyrista | Pirsoniales | Pirsoniales_XX | 0.2±0.1 | 0.2±0.1 | 0.1±0.1 | 0.3±0.1 | 0.3±0.2 | 0±0 | 0.4±0.1 | 0.1±0 |
| Rotosphaerida | Rotosphaerida_X | Rotosphaerida_XXX | 0.2±0.1 | 0.3±0.2 | 0±0 | 0.3±0.1 | 0.2±0.1 | 0±0 | 0.2±0.1 | 0.4±0.2 |
| Gyrista | Coscinodiscophyceae | Stephanopyxidaceae | 0±0 | 0±0 | 0±0 | 0.1±0 | 0±0 | 0.1±0 | 0±0 | 0±0 |
| Chlorophyta_X | Pyramimonadophyceae | Pterospermaceae | 0.4±0.2 | 0±0 | 0±0 | 0.3±0.2 | 1.3±0.7 | 0±0 | 0.9±0.4 | 0±0 |
| Gyrista | Bacillariophyceae | Pleurosigmataceae | 0.1±0 | 0.2±0.1 | 0±0 | 0±0 | 0±0 | 0.2±0.2 | 0±0 | 0±0 |
| Gyrista | Chrysophyceae | Chrysophyceae_Clade-EC2H_X | 0.1±0 | 0.1±0 | 0.1±0.1 | 0.1±0.1 | 0±0 | 0.1±0 | 0.1±0 | 0±0 |
| Dinoflagellata | Syndiniales | Dino-Group-II_X | 0.1±0 | 0±0 | 0±0 | 0.2±0.1 | 0.1±0.1 | 0±0 | 0.1±0 | 0.2±0.1 |
| Telonemia_X | Telonemia_XX | Telonemia-Group-1 | 0.2±0 | 0.1±0 | 0±0 | 0.2±0.1 | 0.2±0.1 | 0±0 | 0.1±0.1 | 0.3±0.1 |
| Apusomonada_X | Apusomonadidae | Apusomonadidae_Group-1_X | 0.2±0.1 | 0.2±0 | 0.1±0 | 0.5±0.2 | 0.2±0.1 | 0±0 | 0.2±0.1 | 0.5±0.2 |
| Cercozoa | Filosa-Imbricatea | Thaumatomonadida_X | 0.1±0 | 0.1±0 | 0±0 | 0.1±0 | 0.1±0.1 | 0.1±0 | 0±0 | 0.1±0 |
| Chlorophyta_X | Mamiellophyceae | Crustomastigaceae | 0.4±0.2 | 0±0 | 0.1±0 | 0.6±0.3 | 1±0.7 | 0±0 | 0.9±0.4 | 0±0 |
| Dinoflagellata | Syndiniales | Dino-Group-I-Clade-4 | 0.1±0 | 0±0 | 0.2±0.2 | 0.1±0.1 | 0.2±0.1 | 0±0 | 0.2±0.1 | 0±0 |
| Dinoflagellata | Dinophyceae | Blastodiniaceae | 0±0 | 0.1±0.1 | 0±0 | 0±0 | 0±0 | 0±0 | 0.1±0.1 | 0±0 |
| Chlorophyta_X | Mamiellophyceae | Dolichomastigaceae | 0.3±0.1 | 0.1±0.1 | 0.2±0.1 | 0.4±0.2 | 0.4±0.3 | 0±0 | 0.5±0.2 | 0±0 |
| Ciliophora | Spirotrichea | Strombidinopsidae | 0±0 | 0.1±0 | 0±0 | 0.1±0 | 0±0 | 0.1±0 | 0±0 | 0.1±0 |
| Gyrista | Bolidophyceae | Parmales_env_2 | 0.1±0 | 0±0 | 0±0 | 0.1±0 | 0.1±0.1 | 0±0 | 0±0 | 0.2±0 |
| Chrompodellids | Colpodellidea | Colpodellida_CHR1 | 0±0 | 0±0 | 0±0 | 0±0 | 0.1±0 | 0±0 | 0±0 | 0.1±0 |
| Ciliophora | Spirotrichea | Trachelostylidae | 0±0 | 0.1±0 | 0±0 | 0±0 | 0±0 | 0±0 | 0.1±0 | 0±0 |
| Gyrista | Chrysophyceae | Chrysophyceae_Clade-EC2I_X | 0±0 | 0±0 | 0±0 | 0.1±0 | 0±0 | 0±0 | 0±0 | 0.1±0 |
| Ciliophora | Spirotrichea | Strobilidiidae | 0±0 | 0±0 | 0±0 | 0±0 | 0±0 | 0.1±0 | 0±0 | 0±0 |
| Chlorophyta_X | Trebouxiophyceae | Chlorellales_X | 0.1±0 | 0.1±0 | 0.1±0 | 0.1±0 | 0.1±0 | 0±0 | 0.1±0 | 0.1±0 |
| Prasinodermophyta_X | Prasinodermophyceae | Prasinodermaceae | 0.1±0 | 0±0 | 0±0 | 0.1±0.1 | 0.1±0.1 | 0±0 | 0.2±0.1 | 0±0 |
| Chlorophyta_X | Pyramimonadophyceae | Pycnococcaceae | 0±0 | 0±0 | 0±0 | 0.1±0 | 0±0 | 0±0 | 0±0 | 0±0 |
| Dinoflagellata | Dinophyceae | Symbiodiniaceae | 0±0 | 0±0 | 0.1±0.1 | 0.1±0.1 | 0.1±0 | 0±0 | 0.1±0.1 | 0±0 |
| Dinoflagellata | Syndiniales | Dino-Group-II-Clade-9 | 0±0 | 0±0 | 0±0 | 0±0 | 0.1±0 | 0±0 | 0±0 | 0.1±0 |
| Haptophyta_X | Prymnesiophyceae | Prymnesiales_X | 0±0 | 0±0 | 0±0 | 0.1±0 | 0±0 | 0.1±0 | 0±0 | 0±0 |
| Gyrista | Mediophyceae | Attheyaceae | 0.1±0 | 0.1±0 | 0.1±0 | 0±0 | 0.1±0 | 0±0 | 0.1±0 | 0.1±0 |
| Metazoa | Mollusca | Lucinoida | 0±0 | 0±0 | 0±0 | 0±0 | 0±0 | 0.1±0.1 | 0±0 | 0±0 |
| Ciliophora | Spirotrichea | TIN_05 | 0±0 | 0±0 | 0±0 | 0±0 | 0±0 | 0±0 | 0±0 | 0±0 |
| Bigyra | Opalozoa | MAST-12 | 0±0 | 0±0 | 0±0 | 0.1±0.1 | 0±0 | 0±0 | 0.1±0 | 0±0 |
| Metazoa | Gastrotricha | Gastrotricha_XX | 0±0 | 0±0 | 0±0 | 0.1±0 | 0±0 | 0.1±0 | 0±0 | 0±0 |
| Perkinsea | Perkinsida | Pararosariidae | 0.2±0 | 0.1±0.1 | 0.2±0.1 | 0.2±0.1 | 0.2±0.1 | 0±0 | 0.2±0.1 | 0.1±0.1 |
| Fungi | Chytridiomycota | Rhizophydiaceae | 0±0 | 0±0 | 0±0 | 0±0 | 0.1±0 | 0±0 | 0±0 | 0.1±0 |
| Cercozoa | Filosa-Imbricatea | Marimonadida_X | 0±0 | 0±0 | 0±0 | 0.1±0 | 0.1±0.1 | 0±0 | 0±0 | 0.1±0 |
| Metazoa | Platyhelminthes | Acoelomorpha | 0.2±0.1 | 0.1±0 | 0±0 | 0.5±0.4 | 0.2±0.2 | 0±0 | 0.5±0.3 | 0±0 |
| Chlorophyta_X | Chlorophyceae | Chlamydomonadales_X | 0±0 | 0.1±0 | 0±0 | 0±0 | 0±0 | 0±0 | 0±0 | 0.1±0 |
| Ciliophora | Spirotrichea | Oligotrichida_X | 0±0 | 0±0 | 0±0 | 0±0 | 0±0 | 0±0 | 0±0 | 0±0 |
| Opisthokonta_X | Opisthokonta_XX | Opisthokonta_XXXX | 0.1±0 | 0.1±0 | 0±0 | 0.1±0.1 | 0±0 | 0.1±0 | 0.1±0 | 0.1±0 |
| Radiolaria | Acantharea | Acantharea_C3 | 0±0 | 0±0 | 0±0 | 0±0 | 0±0 | 0±0 | 0±0 | 0±0 |
| Ciliophora | Spirotrichea | Tontoniidae | 0±0 | 0±0 | 0±0 | 0±0 | 0±0 | 0±0 | 0±0 | 0±0 |
| Gyrista | Peronosporomycetes | Peronosporomycetes_XX | 0.1±0.1 | 0±0 | 0.1±0 | 0.1±0.1 | 0.3±0.2 | 0±0 | 0.3±0.1 | 0±0 |
| Dinoflagellata | Syndiniales | Dino-Group-IV-Hematodinium-Group | 0±0 | 0±0 | 0.4±0.3 | 0±0 | 0±0 | 0±0 | 0.1±0.1 | 0±0 |
| Apicomplexa | Coccidiomorphea | Eimeriidae | 0±0 | 0±0 | 0±0 | 0±0 | 0±0 | 0±0 | 0±0 | 0±0 |
| Dinoflagellata | Dinophyceae | Kareniaceae | 0±0 | 0±0 | 0±0 | 0±0 | 0±0 | 0±0 | 0±0 | 0±0 |
| Ciliophora | Spirotrichea | Oxytrichidae | 0.1±0 | 0±0 | 0.1±0.1 | 0.1±0.1 | 0.1±0 | 0±0 | 0.1±0 | 0±0 |
| Ciliophora | Oligohymenophorea | Philasterida | 0±0 | 0±0 | 0±0 | 0±0 | 0±0 | 0±0 | 0±0 | 0±0 |
| Centroplasthelida_X | Centroplasthelida_XX | Centroplasthelida_XXXX | 0±0 | 0±0 | 0±0 | 0±0 | 0±0 | 0±0 | 0±0 | 0±0 |
| Gyrista | Coscinodiscophyceae | Rhizosoleniaceae | 0±0 | 0±0 | 0±0 | 0±0 | 0±0 | 0±0 | 0±0 | 0±0 |
| Cercozoa | Endomyxa-Phytomyxea | Phagomyxida_X | 0±0 | 0±0 | 0±0 | 0±0 | 0±0 | 0±0 | 0±0 | 0±0 |
| Gyrista | Mediophyceae | Probosciaceae | 0±0 | 0±0 | 0±0 | 0±0 | 0±0 | 0±0 | 0±0 | 0±0 |
| Dinoflagellata | Dinophyceae | Amphisoleniaceae | 0±0 | 0±0 | 0±0 | 0±0 | 0±0 | 0±0 | 0±0 | 0±0 |
| Cercozoa | Filosa-Thecofilosea | Ebriidae | 0±0 | 0±0 | 0±0 | 0±0 | 0±0 | 0±0 | 0±0 | 0±0 |
| Haptophyta_X | Prymnesiophyceae | Prymnesiophyceae_Clade_B3 | 0±0 | 0±0 | 0±0 | 0±0 | 0±0 | 0±0 | 0±0 | 0±0 |
| Cercozoa | Filosa-Thecofilosea | Ventricleftida_X | 0±0 | 0±0 | 0±0 | 0±0 | 0±0 | 0±0 | 0±0 | 0±0 |
| Dinoflagellata | Dinophyceae | Prorocentraceae | 0.1±0 | 0±0 | 0±0 | 0±0 | 0.2±0.1 | 0±0 | 0.1±0 | 0.1±0.1 |
| Chlorophyta_X | Prasino-Clade-VIII | Prasino-Clade-VIII_XX | 0±0 | 0±0 | 0±0 | 0±0 | 0±0 | 0±0 | 0±0 | 0±0 |
| Centroplasthelida_X | Pterocystida | Pterocystidae | 0±0 | 0±0 | 0±0 | 0±0 | 0±0 | 0±0 | 0±0 | 0±0 |
| Gyrista | Coscinodiscophyceae | Hemidiscaceae | 0±0 | 0±0 | 0.1±0.1 | 0±0 | 0±0 | 0±0 | 0±0 | 0±0 |
| Cryptophyta_X:nucl | Cryptophyceae:nucl | Hemiselmidaceae:nucl | 0±0 | 0±0 | 0±0 | 0±0 | 0±0 | 0±0 | 0±0 | 0±0 |
| Dinoflagellata | Dinophyceae | Protoceratiaceae | 0±0 | 0±0 | 0±0 | 0±0 | 0±0 | 0±0 | 0±0 | 0±0 |
| Bigyra | Sagenista | MAST-6 | 0±0 | 0±0 | 0.1±0 | 0±0 | 0±0 | 0±0 | 0±0 | 0±0 |
| Bigyra | Sagenista | MAST-8 | 0±0 | 0±0 | 0±0 | 0±0 | 0±0 | 0±0 | 0±0 | 0±0 |
| Bigyra | Sagenista | Labyrinthulomycetes_LAB11 | 0±0 | 0±0 | 0±0 | 0±0 | 0±0 | 0±0 | 0±0 | 0±0 |
| Cercozoa | Filosa-Thecofilosea | Cryothecomonas-lineage | 0±0 | 0±0 | 0±0 | 0±0 | 0±0 | 0±0 | 0±0 | 0±0 |
| Bigyra | Sagenista | Amphitraemidae | 0±0 | 0±0 | 0.1±0.1 | 0±0 | 0±0 | 0±0 | 0±0 | 0±0 |
| Apicomplexa | Coccidiomorphea | Sarcocystidae | 0±0 | 0±0 | 0±0 | 0±0 | 0±0 | 0±0 | 0±0 | 0±0 |
| Dinoflagellata | Syndiniales | Dino-Group-I-Clade-5 | 0±0 | 0±0 | 0±0 | 0±0 | 0±0 | 0±0 | 0±0 | 0±0 |
| Ciliophora | Spirotrichea | Holostichidae | 0±0 | 0±0 | 0±0 | 0±0 | 0±0 | 0±0 | 0±0 | 0±0 |
| Stramenopiles_X | Stramenopiles_X-Group-2 | Stramenopiles_X-Group-2_XX | 0±0 | 0±0 | 0±0 | 0±0 | 0±0 | 0±0 | 0±0 | 0±0 |
| Dinoflagellata | Dinophyceae | Kryptoperidiniaceae | 0±0 | 0±0 | 0±0 | 0.1±0.1 | 0±0 | 0±0 | 0.1±0 | 0±0 |
| Breviatea_X | Breviatea_XX | Subulatomonas-lineage | 0±0 | 0±0 | 0±0 | 0±0 | 0±0 | 0±0 | 0±0 | 0±0 |
| Gyrista | Pelagophyceae | Pelagomonadales_clade_A | 0±0 | 0±0 | 0±0 | 0±0 | 0±0 | 0±0 | 0±0 | 0±0 |
| Ciliophora | Spirotrichea | Aspidiscidae | 0±0 | 0±0 | 0±0 | 0±0 | 0±0 | 0±0 | 0±0 | 0±0 |
| Bigyra | Sagenista | Labyrinthulaceae | 0±0 | 0±0 | 0±0 | 0±0 | 0±0 | 0±0 | 0±0 | 0±0 |
| Perkinsea | Perkinsida | Perkinsidae | 0±0 | 0±0 | 0±0 | 0.1±0.1 | 0±0 | 0±0 | 0.1±0 | 0±0 |
| Chlorophyta_X | Chlorophyta_XX | Chlorophyta_XXXX | 0±0 | 0±0 | 0±0 | 0±0 | 0±0 | 0±0 | 0±0 | 0±0 |
| Cercozoa | Filosa-Thecofilosea | Protaspa-lineage | 0.1±0 | 0±0 | 0.1±0 | 0.1±0.1 | 0.1±0 | 0±0 | 0.1±0 | 0±0 |
| Kathablepharida | Kathablepharidea | Kathablepharidida_X | 0±0 | 0±0 | 0±0 | 0±0 | 0±0 | 0±0 | 0±0 | 0±0 |
| Gyrista | Developea | Developea_XX | 0±0 | 0±0 | 0±0 | 0±0 | 0±0 | 0±0 | 0±0 | 0±0 |
| Apicomplexa | Coccidiomorphea | Rhytidocystidae | 0±0 | 0±0 | 0±0 | 0±0 | 0±0 | 0±0 | 0±0 | 0.1±0 |
| Tubulinea_X | Elardia | Vermamoebidae | 0±0 | 0±0 | 0±0 | 0±0 | 0±0 | 0±0 | 0±0 | 0±0 |
| Dinoflagellata | Syndiniales | Dino-Group-II-Clade-23 | 0±0 | 0±0 | 0±0 | 0±0 | 0±0 | 0±0 | 0±0 | 0±0 |
| Dinoflagellata | Dinophyceae | Lingulodiniaceae | 0±0 | 0±0 | 0±0 | 0±0 | 0±0 | 0±0 | 0±0 | 0±0 |
| Bigyra | Sagenista | Labyrinthulomycetes_LAB5 | 0±0 | 0±0 | 0±0 | 0±0 | 0±0 | 0±0 | 0±0 | 0±0 |
| Bigyra | Bicoecea | Bicoecea_XX | 0±0 | 0±0 | 0±0 | 0±0 | 0±0 | 0±0 | 0±0 | 0±0 |
| Choanoflagellata | Choanoflagellatea | Choanoflagellatea_XX | 0±0 | 0±0 | 0±0 | 0±0 | 0±0 | 0±0 | 0±0 | 0±0 |
| Choanoflagellata | Choanoflagellatea | Stephanoecidae_Group_H | 0±0 | 0±0 | 0±0 | 0±0 | 0±0 | 0±0 | 0±0 | 0±0 |
| Metazoa | Craniata | Teleostei | 0±0 | 0±0 | 0±0 | 0±0 | 0±0 | 0±0 | 0±0 | 0±0 |
| Gyrista | Bacillariophyceae | Stauroneidaceae | 0±0 | 0±0 | 0±0 | 0±0 | 0±0 | 0±0 | 0±0 | 0±0 |
| Gyrista | Hyphochytriomyceta | Hyphochrytriaceae | 0±0 | 0±0 | 0±0 | 0±0 | 0±0 | 0±0 | 0±0 | 0±0 |
| Metazoa | Echinodermata | Echinodermata_XX | 0±0 | 0±0 | 0.2±0.1 | 0±0 | 0±0 | 0±0 | 0±0 | 0±0 |
| Bigyra | Sagenista | Amphifilaceae | 0±0 | 0±0 | 0±0 | 0±0 | 0±0 | 0±0 | 0±0 | 0±0 |
| Dinoflagellata | Dinophyceae | Ceratoperidiniaceae | 0±0 | 0±0 | 0±0 | 0±0 | 0±0 | 0±0 | 0±0 | 0±0 |
| Gyrista | Chrysophyceae | Ochromonadaceae | 0±0 | 0±0 | 0±0 | 0.1±0 | 0±0 | 0±0 | 0±0 | 0±0 |
| Cercozoa | Endomyxa | op14-lineage | 0±0 | 0±0 | 0±0 | 0±0 | 0±0 | 0±0 | 0±0 | 0±0 |
| Fungi | Blastocladiomycota | Blastocladiomycetes | 0±0 | 0±0 | 0±0 | 0±0 | 0±0 | 0±0 | 0±0 | 0±0 |
| Fungi | Chytridiomycota | Rhizophydiales_X | 0±0 | 0±0 | 0.1±0 | 0±0 | 0.1±0 | 0±0 | 0.1±0 | 0±0 |
| Dinoflagellata | Syndiniales | Dino-Group-II-Clade-1 | 0±0 | 0±0 | 0±0 | 0±0 | 0±0 | 0±0 | 0±0 | 0±0 |
| Bigyra | Sagenista | Labyrinthulomycetes_LAB16 | 0±0 | 0±0 | 0±0 | 0±0 | 0±0 | 0±0 | 0±0 | 0±0 |
| Dinoflagellata | Dinophyceae | Warnowiaceae | 0±0 | 0±0 | 0±0 | 0±0 | 0±0 | 0±0 | 0±0 | 0±0 |
| Fungi | Mucoromycota | Umbelopsidales | 0±0 | 0±0 | 0±0 | 0±0 | 0±0 | 0±0 | 0±0 | 0±0 |
| Cercozoa | Filosa-Thecofilosea | TAGIRI1-lineage | 0±0 | 0±0 | 0±0 | 0±0 | 0±0 | 0±0 | 0±0 | 0±0 |
| Telonemia_X | Telonemia_XX | Telonemia-Group-2 | 0±0 | 0±0 | 0±0 | 0±0 | 0±0 | 0±0 | 0±0 | 0±0 |
| Radiolaria | Polycystinea | Astrosphaeridae | 0±0 | 0±0 | 0±0 | 0±0 | 0±0 | 0±0 | 0±0 | 0±0 |
| Ichthyosporea | Ichthyophonida | Pseudoperkinsidae_X | 0±0 | 0±0 | 0±0 | 0±0 | 0±0 | 0±0 | 0±0 | 0±0 |
| Gyrista | Chrysophyceae | Hydrurales_Clade-II | 0±0 | 0±0 | 0±0 | 0±0 | 0±0 | 0±0 | 0±0 | 0±0 |
| Chlorophyta_X | Mamiellophyceae | Monomastigaceae | 0±0 | 0±0 | 0±0 | 0±0 | 0±0 | 0±0 | 0±0 | 0±0 |
| Ciliophora | Phyllopharyngea | Orthodonellidae | 0±0 | 0±0 | 0±0 | 0±0 | 0±0 | 0±0 | 0±0 | 0±0 |
| Evosea_X | Variosea | Schizoplasmodiidae | 0±0 | 0±0 | 0±0 | 0±0 | 0±0 | 0±0 | 0±0 | 0±0 |
| Fungi | Mucoromycota | Glomeromycotina_X | 0.4±0.4 | 0±0 | 0±0 | 0±0 | 1.6±1.4 | 0±0 | 0.8±0.7 | 0±0 |
| Cercozoa | Endomyxa | Filoretidae_X | 0±0 | 0±0 | 0±0 | 0±0 | 0±0 | 0±0 | 0±0 | 0±0 |
| Cercozoa | Filosa-Imbricatea | Thaumatomonadidae | 0±0 | 0±0 | 0±0 | 0±0 | 0±0 | 0±0 | 0±0 | 0±0 |
| Choanoflagellata | Choanoflagellatea | Acanthoecidae | 0±0 | 0±0 | 0±0 | 0±0 | 0±0 | 0±0 | 0±0 | 0±0 |
| Gyrista | Bacillariophyceae | Entomoneidaceae | 0±0 | 0±0 | 0±0 | 0±0 | 0±0 | 0±0 | 0±0 | 0±0 |
| Choanoflagellata | Choanoflagellatea | Stephanoecidae_Group_F | 0±0 | 0±0 | 0±0 | 0±0 | 0±0 | 0±0 | 0±0 | 0±0 |
| Haptophyta_X | Prymnesiophyceae | Chrysochromulinaceae | 0±0 | 0±0 | 0±0 | 0±0 | 0±0 | 0±0 | 0±0 | 0±0 |
| Dinoflagellata | Dinophyta_X | Dinophyta_XXX | 0±0 | 0±0 | 0±0 | 0±0 | 0±0 | 0±0 | 0±0 | 0±0 |
| Cercozoa | Endomyxa | Vampyrellida_X | 0±0 | 0±0 | 0±0 | 0±0 | 0±0 | 0±0 | 0±0 | 0±0 |
| Ciliophora | Spirotrichea | Eutintinnidae | 0±0 | 0±0 | 0±0 | 0±0 | 0±0 | 0±0 | 0±0 | 0±0 |
| Tubulinea_X | Elardia | Nolandellidae | 0±0 | 0±0 | 0±0 | 0±0 | 0±0 | 0±0 | 0±0 | 0±0 |
| Dinoflagellata | Syndiniales | Dino-Group-II-Clade-6 | 0±0 | 0±0 | 0±0 | 0±0 | 0±0 | 0±0 | 0±0 | 0±0 |
| Gyrista | MOCH-2 | MOCH-2_XX | 0±0 | 0±0 | 0±0 | 0±0 | 0.1±0 | 0±0 | 0±0 | 0±0 |
| Haptophyta_X | Prymnesiophyceae | Phaeocystaceae | 0.3±0.3 | 0±0 | 0±0 | 0±0 | 1.2±1.1 | 0±0 | 0.6±0.6 | 0±0 |
| Metazoa | Mollusca | Arcoida | 0±0 | 0±0 | 0±0 | 0±0 | 0±0 | 0±0 | 0±0 | 0±0 |
| Radiolaria | RAD-A | RAD-A_Xb | 0±0 | 0±0 | 0±0 | 0±0 | 0±0 | 0±0 | 0±0 | 0±0 |
| Rhodophyta_X | Florideophyceae | Corallinales_X | 0±0 | 0±0 | 0±0 | 0±0 | 0±0 | 0±0 | 0±0 | 0±0 |
| Cercozoa | Endomyxa | Sey055-lineage | 0±0 | 0±0 | 0±0 | 0±0 | 0±0 | 0±0 | 0±0 | 0±0 |
| Gyrista | Mediophyceae | Odontellaceae | 0±0 | 0±0 | 0±0 | 0±0 | 0±0 | 0±0 | 0±0 | 0±0 |
| Gyrista | Bacillariophyceae | Pinnulariaceae | 0±0 | 0±0 | 0±0 | 0±0 | 0±0 | 0±0 | 0±0 | 0±0 |
| Gyrista | Bacillariophyceae | Sellaphoraceae | 0±0 | 0±0 | 0±0 | 0±0 | 0±0 | 0±0 | 0±0 | 0±0 |
| Choanoflagellata | Choanoflagellatea | Stephanoecidae_Group_D | 0±0 | 0±0 | 0±0 | 0±0 | 0±0 | 0±0 | 0±0 | 0±0 |
| Cercozoa | Endomyxa-Ascetosporea | Haplosporida_X | 0±0 | 0±0 | 0±0 | 0±0 | 0±0 | 0±0 | 0±0 | 0±0 |
| Choanoflagellata | Choanoflagellatea | Monosigidae_Group_A | 0±0 | 0±0 | 0±0 | 0±0 | 0±0 | 0±0 | 0±0 | 0±0 |
| Gyrista | Bacillariophyceae | Diploneidaceae | 0±0 | 0±0 | 0±0 | 0±0 | 0±0 | 0±0 | 0±0 | 0±0 |
| Dinoflagellata | Dinophyceae | Amphidomataceae | 0±0 | 0±0 | 0±0 | 0±0 | 0±0 | 0±0 | 0±0 | 0±0 |
| Dinoflagellata | Syndiniales | Dino-Group-II-Clade-25 | 0±0 | 0±0 | 0±0 | 0±0 | 0±0 | 0±0 | 0±0 | 0±0 |
| Cercozoa | Filosa-Thecofilosea | Filosa-Thecofilosea_XX | 0±0 | 0±0 | 0±0 | 0±0 | 0±0 | 0±0 | 0±0 | 0±0 |
| Tubulinea_X | Elardia | Phryganellina | 0±0 | 0±0 | 0±0 | 0±0 | 0±0 | 0±0 | 0±0 | 0±0 |
| Nebulidia_X | Nebulidea | Nebulidae | 0±0 | 0±0 | 0±0 | 0±0 | 0±0 | 0±0 | 0±0 | 0±0 |
| Fornicata | Carpediemonadea | Carpediemonadidae | 0±0 | 0±0 | 0±0 | 0±0 | 0±0 | 0±0 | 0±0 | 0±0 |
| Ciliophora | Spirotrichea | Discocephalidae | 0±0 | 0±0 | 0±0 | 0±0 | 0±0 | 0±0 | 0±0 | 0±0 |
| Fungi | Mucoromycota | Glomerales | 0±0 | 0±0 | 0±0 | 0±0 | 0±0 | 0±0 | 0±0 | 0±0 |
| Picozoa_X | Picozoa_XX | Picozoa_XXXX | 0±0 | 0±0 | 0±0 | 0±0 | 0±0 | 0±0 | 0±0 | 0±0 |
| Ichthyosporea | Dermocystida | Rhynosporidae_X | 0±0 | 0±0 | 0±0 | 0±0 | 0±0 | 0±0 | 0±0 | 0±0 |
| Dinoflagellata | Dinophyceae | Ptychodiscaceae | 0±0 | 0±0 | 0±0 | 0±0 | 0±0 | 0±0 | 0±0 | 0±0 |
| Fungi | Chytridiomycota | Lobulomycetaceae | 0±0 | 0±0 | 0±0 | 0±0 | 0±0 | 0±0 | 0±0 | 0±0 |
| Cercozoa | Endomyxa | Thalassomyxa-lineage | 0±0 | 0±0 | 0±0 | 0±0 | 0±0 | 0±0 | 0±0 | 0±0 |
| Metazoa | Porifera | Calcarea | 0±0 | 0±0 | 0±0 | 0±0 | 0±0 | 0±0 | 0±0 | 0±0 |
| Bigyra | Sagenista | Thraustochytriaceae | 0±0 | 0±0 | 0±0 | 0±0 | 0±0 | 0±0 | 0±0 | 0±0 |
| Fungi | Chytridiomycota | Gonapodyaceae | 0±0 | 0±0 | 0±0 | 0±0 | 0±0 | 0±0 | 0±0 | 0±0 |
| Fungi | Chytridiomycota | Spizellomycetaceae | 0±0 | 0±0 | 0±0 | 0±0 | 0±0 | 0±0 | 0±0 | 0±0 |
| Dinoflagellata | Syndiniales | Dino-Group-II-Clade-8 | 0±0 | 0±0 | 0±0 | 0±0 | 0±0 | 0±0 | 0±0 | 0±0 |
| Rhodophyta_X | Compsopogonophyceae | Compsopogonales_X | 0±0 | 0±0 | 0±0 | 0±0 | 0±0 | 0±0 | 0±0 | 0±0 |
| Chlorophyta_X | Chlorophyceae | Chlorophyceae_XX | 0±0 | 0±0 | 0±0 | 0±0 | 0±0 | 0±0 | 0±0 | 0±0 |
| Metazoa | Cnidaria | Scyphozoa | 0±0 | 0±0 | 0±0 | 0±0 | 0±0 | 0±0 | 0±0 | 0±0 |
| Choanoflagellata | Choanoflagellatea | Monosigidae_Group_O | 0±0 | 0±0 | 0±0 | 0±0 | 0±0 | 0±0 | 0±0 | 0±0 |
| Bigyra | Sagenista | Pseudophyllomitidae_X | 0±0 | 0±0 | 0±0 | 0±0 | 0±0 | 0±0 | 0±0 | 0±0 |
| Gyrista | Chrysophyceae | Chrysophyceae_XX | 0±0 | 0±0 | 0±0 | 0±0 | 0±0 | 0±0 | 0±0 | 0±0 |
| Bigyra | Sagenista | Labyrinthulomycetes_LAB2 | 0±0 | 0±0 | 0±0 | 0±0 | 0±0 | 0±0 | 0±0 | 0±0 |
| Cercozoa | Filosa-Granofilosea | Nanofilidae | 0±0 | 0±0 | 0±0 | 0±0 | 0±0 | 0±0 | 0±0 | 0±0 |
| Cercozoa | Filosa-Thecofilosea | Cryomonadida_X | 0±0 | 0±0 | 0±0 | 0±0 | 0±0 | 0±0 | 0±0 | 0±0 |
| Choanoflagellata | Choanoflagellatea | Acanthoecidae_Group_G | 0±0 | 0±0 | 0±0 | 0±0 | 0±0 | 0±0 | 0±0 | 0±0 |
| Chlorophyta_X | Chloropicophyceae | Chloropicaceae | 0±0 | 0±0 | 0±0 | 0±0 | 0±0 | 0±0 | 0±0 | 0±0 |
| Metazoa | Porifera | Demospongiae | 0±0 | 0±0 | 0±0 | 0±0 | 0±0 | 0±0 | 0±0 | 0±0 |
| Choanoflagellata | Choanoflagellatea | Choanoflagellatea_XX_Group_L | 0±0 | 0±0 | 0±0 | 0±0 | 0±0 | 0±0 | 0±0 | 0±0 |
| Bigyra | Sagenista | Labyrinthulomycetes_LAB1/6/8 | 0±0 | 0±0 | 0±0 | 0±0 | 0.1±0 | 0±0 | 0.1±0 | 0±0 |
| Bigyra | Sagenista | Labyrinthulomycetes_LAB10 | 0±0 | 0±0 | 0±0 | 0±0 | 0±0 | 0±0 | 0±0 | 0±0 |
| Dinoflagellata | Syndiniales | Dino-Group-II-Clade-16 | 0±0 | 0±0 | 0±0 | 0±0 | 0±0 | 0±0 | 0±0 | 0±0 |
| Cryptophyta_X | Cryptophyceae | Goniomonadales_X | 0±0 | 0±0 | 0±0 | 0±0 | 0±0 | 0±0 | 0±0 | 0±0 |
| Dinoflagellata | Syndiniales | Dino-Group-II-Clade-14 | 0±0 | 0±0 | 0±0 | 0±0 | 0±0 | 0±0 | 0±0 | 0±0 |
| Dinoflagellata | Syndiniales | Dino-Group-II-Clade-21 | 0±0 | 0±0 | 0±0 | 0±0 | 0±0 | 0±0 | 0±0 | 0±0 |
| Dinoflagellata | Syndiniales | Dino-Group-II-Clade-30 | 0±0 | 0±0 | 0±0 | 0±0 | 0±0 | 0±0 | 0±0 | 0±0 |
| Dinoflagellata | Syndiniales | Dino-Group-II-Clade-5 | 0±0 | 0±0 | 0±0 | 0±0 | 0±0 | 0±0 | 0±0 | 0±0 |
| Chlorophyta_X | Mamiellophyceae | Bathycoccaceae | 0±0 | 0±0 | 0±0 | 0±0 | 0±0 | 0±0 | 0±0 | 0±0 |
| Ancyromonadida_X | Ancyromonadida_XX | Ancyromonadida_Group-1 | 0±0 | 0±0 | 0±0 | 0±0 | 0±0 | 0±0 | 0±0 | 0±0 |
| Fungi | Fungi_X | Fungi_XXX | 0±0 | 0±0 | 0±0 | 0±0 | 0±0 | 0±0 | 0±0 | 0±0 |
| Metazoa | Bryozoa | Bryozoa_XX | 0±0 | 0±0 | 0±0 | 0±0 | 0±0 | 0±0 | 0±0 | 0±0 |
| Radiolaria | RAD-B | RAD-B_X_Group-Ib | 0±0 | 0±0 | 0±0 | 0±0 | 0±0 | 0±0 | 0±0 | 0±0 |
| Bigyra | Opalozoa | MAST-3 | 0±0 | 0±0 | 0±0 | 0±0 | 0±0 | 0±0 | 0±0 | 0±0 |
| Metazoa | Nematoda | Chromadoridae | 0±0 | 0±0 | 0±0 | 0±0 | 0±0 | 0±0 | 0±0 | 0±0 |
| Dinoflagellata | Syndiniales | Dino-Group-I-Clade-7 | 0±0 | 0±0 | 0±0 | 0±0 | 0±0 | 0±0 | 0±0 | 0±0 |
| Gyrista | Bacillariophyceae | Cymbellaceae | 0±0 | 0±0 | 0±0 | 0±0 | 0±0 | 0±0 | 0±0 | 0±0 |
| Cryptophyta_X | Cryptophyceae | Basal_Cryptophyceae-2 | 0±0 | 0±0 | 0±0 | 0±0 | 0±0 | 0±0 | 0±0 | 0±0 |
| Metazoa | Rotifera | Rotifera_XX | 0±0 | 0±0 | 0±0 | 0±0 | 0±0 | 0±0 | 0±0 | 0±0 |
| Gyrista | Bacillariophyceae | Catenulaceae | 0±0 | 0±0 | 0±0 | 0±0 | 0±0 | 0±0 | 0±0 | 0±0 |
| Choanoflagellata | Choanoflagellatea | Stephanoecidae | 0±0 | 0±0 | 0±0 | 0±0 | 0±0 | 0±0 | 0±0 | 0±0 |
| Bigyra | Sagenista | Labyrinthulomycetes_LAB14 | 0±0 | 0±0 | 0±0 | 0±0 | 0±0 | 0±0 | 0±0 | 0±0 |
| Choanoflagellata | Choanoflagellatea | Choanoflagellatea_XX_Group_P | 0±0 | 0±0 | 0±0 | 0±0 | 0±0 | 0±0 | 0±0 | 0±0 |
| Dinoflagellata | Syndiniales | Dino-Group-III_X | 0±0 | 0±0 | 0±0 | 0±0 | 0±0 | 0±0 | 0±0 | 0±0 |
| Dinoflagellata | Dinophyceae | Gonyaulacaceae | 0±0 | 0±0 | 0±0 | 0±0 | 0±0 | 0±0 | 0±0 | 0±0 |
| Gyrista | Mediophyceae | Skeletonemaceae | 0±0 | 0±0 | 0±0 | 0±0 | 0±0 | 0±0 | 0±0 | 0±0 |
| Fungi | Rozellomycota | Rozellomycota_XX | 0±0 | 0±0 | 0±0 | 0±0 | 0±0 | 0±0 | 0±0 | 0±0 |
| Cercozoa | Filosa-Thecofilosea | Novel-Clade-4 | 0±0 | 0±0 | 0±0 | 0±0 | 0±0 | 0±0 | 0±0 | 0±0 |
| Radiolaria | RAD-B | RAD-B_X_Group-IVc | 0±0 | 0±0 | 0±0 | 0±0 | 0±0 | 0±0 | 0±0 | 0±0 |
| Choanoflagellata | Choanoflagellatea | Monosigidae_Group_B | 0±0 | 0±0 | 0±0 | 0±0 | 0±0 | 0±0 | 0±0 | 0±0 |
| Cercozoa | Endomyxa | Penardia-lineage | 0±0 | 0±0 | 0±0 | 0±0 | 0±0 | 0±0 | 0±0 | 0±0 |
| Fungi | Basidiomycota | Entorrhizales | 0±0 | 0±0 | 0±0 | 0±0 | 0±0 | 0±0 | 0±0 | 0±0 |
| Gyrista | Bacillariophyceae | Surirellaceae | 0±0 | 0±0 | 0±0 | 0±0 | 0±0 | 0±0 | 0±0 | 0±0 |
| Apicomplexa | Coccidiomorphea | Piroplasmorida5 | 0±0 | 0±0 | 0±0 | 0±0 | 0±0 | 0±0 | 0±0 | 0±0 |
| Gyrista | Mediophyceae | Hemiaulaceae | 0±0 | 0±0 | 0±0 | 0±0 | 0±0 | 0±0 | 0±0 | 0±0 |
| Choanoflagellata | Choanoflagellatea | Monosigidae_Group_M | 0±0 | 0±0 | 0±0 | 0±0 | 0±0 | 0±0 | 0±0 | 0±0 |
| Fungi | Mucoromycota | Mucorales | 0±0 | 0±0 | 0±0 | 0±0 | 0±0 | 0±0 | 0±0 | 0±0 |
| Fungi | Chytridiomycota | Spizellomycetales_X | 0±0 | 0±0 | 0±0 | 0±0 | 0±0 | 0±0 | 0±0 | 0±0 |
| Chrompodellids | Colpodellidea | Alphamonaceae | 0±0 | 0±0 | 0±0 | 0±0 | 0±0 | 0±0 | 0±0 | 0±0 |
| Tubulinea_X | Elardia | Flabellulidae | 0±0 | 0±0 | 0±0 | 0±0 | 0±0 | 0±0 | 0±0 | 0±0 |
| Cryptophyta_X | Cryptophyceae | Cryptomonadales_X | 0±0 | 0±0 | 0±0 | 0±0 | 0±0 | 0±0 | 0±0 | 0±0 |
| Fungi | Chytridiomycota | Harpochytriaceae | 0±0 | 0±0 | 0±0 | 0±0 | 0±0 | 0±0 | 0±0 | 0±0 |
| Radiolaria | RAD-B | RAD-B_X_Group-IVd | 0±0 | 0±0 | 0±0 | 0±0 | 0±0 | 0±0 | 0±0 | 0±0 |
| Cercozoa | Filosa-Imbricatea | Paulinellidae | 0±0 | 0±0 | 0±0 | 0±0 | 0±0 | 0±0 | 0±0 | 0±0 |
| Ciliophora | Spirotrichea | TIN_01 | 0±0 | 0±0 | 0±0 | 0±0 | 0±0 | 0±0 | 0±0 | 0±0 |
| Cercozoa | Filosa-Imbricatea | Novel-clade-2 | 0±0 | 0±0 | 0±0 | 0±0 | 0±0 | 0±0 | 0±0 | 0±0 |

Supplementary figures


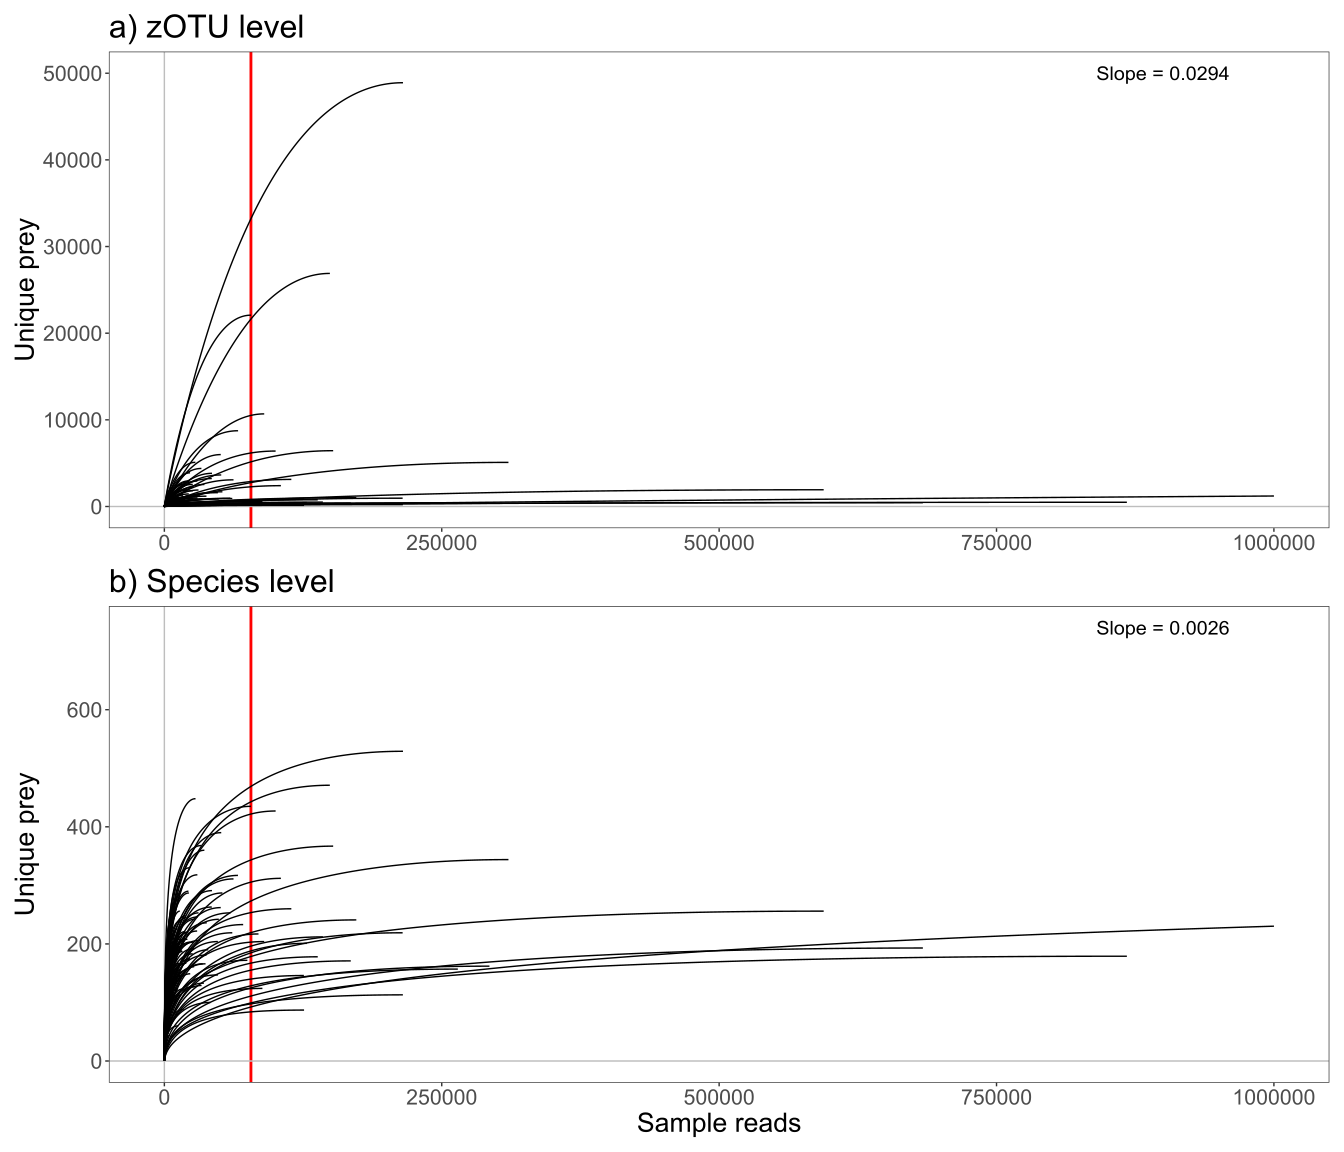


Fig. S1: Rarefaction curves and slopes of nematode prey reads at A) zOTU and B) Species taxonomic levels. Slopes report the average discovery rate of zOTUs and species per new sampled sequence read. Vertical red lines report the average sample size.


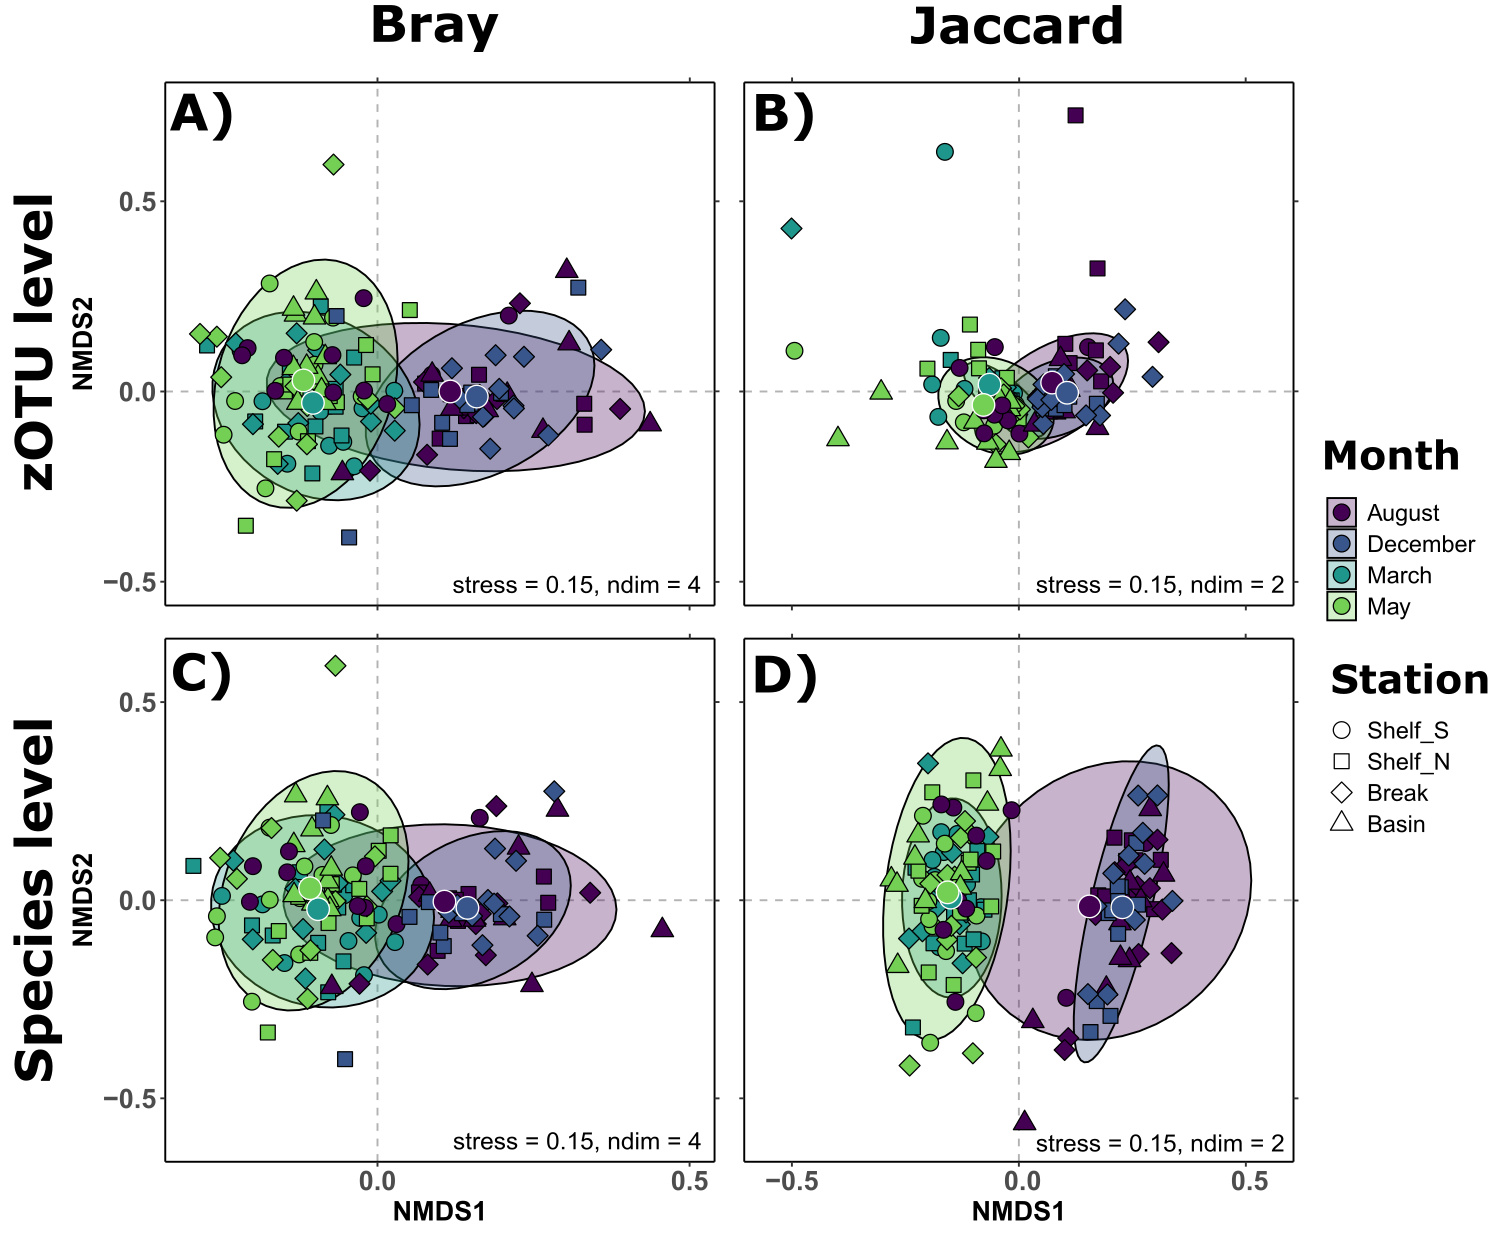


Fig. S2: Similarity patterns of nematode prey compositions on the Barents Sea shelf and adjacent Nansen Basin. In A) and B), similarity patterns of prey compositions are shown using Bray-Curtis (A), and Jaccard (B) dissimilarities computed from zOTU-level prey data (included in the manuscript). In C) and D), similarity patterns of prey compositions are shown using Bray-Curtis (A), and Jaccard (B) dissimilarities computed from species-level prey data. In all panels, sample points are colored according to month, and shapes denote the station sampled. Ellipses indicate 95% confidence levels, with centroids showing the average within-month position.


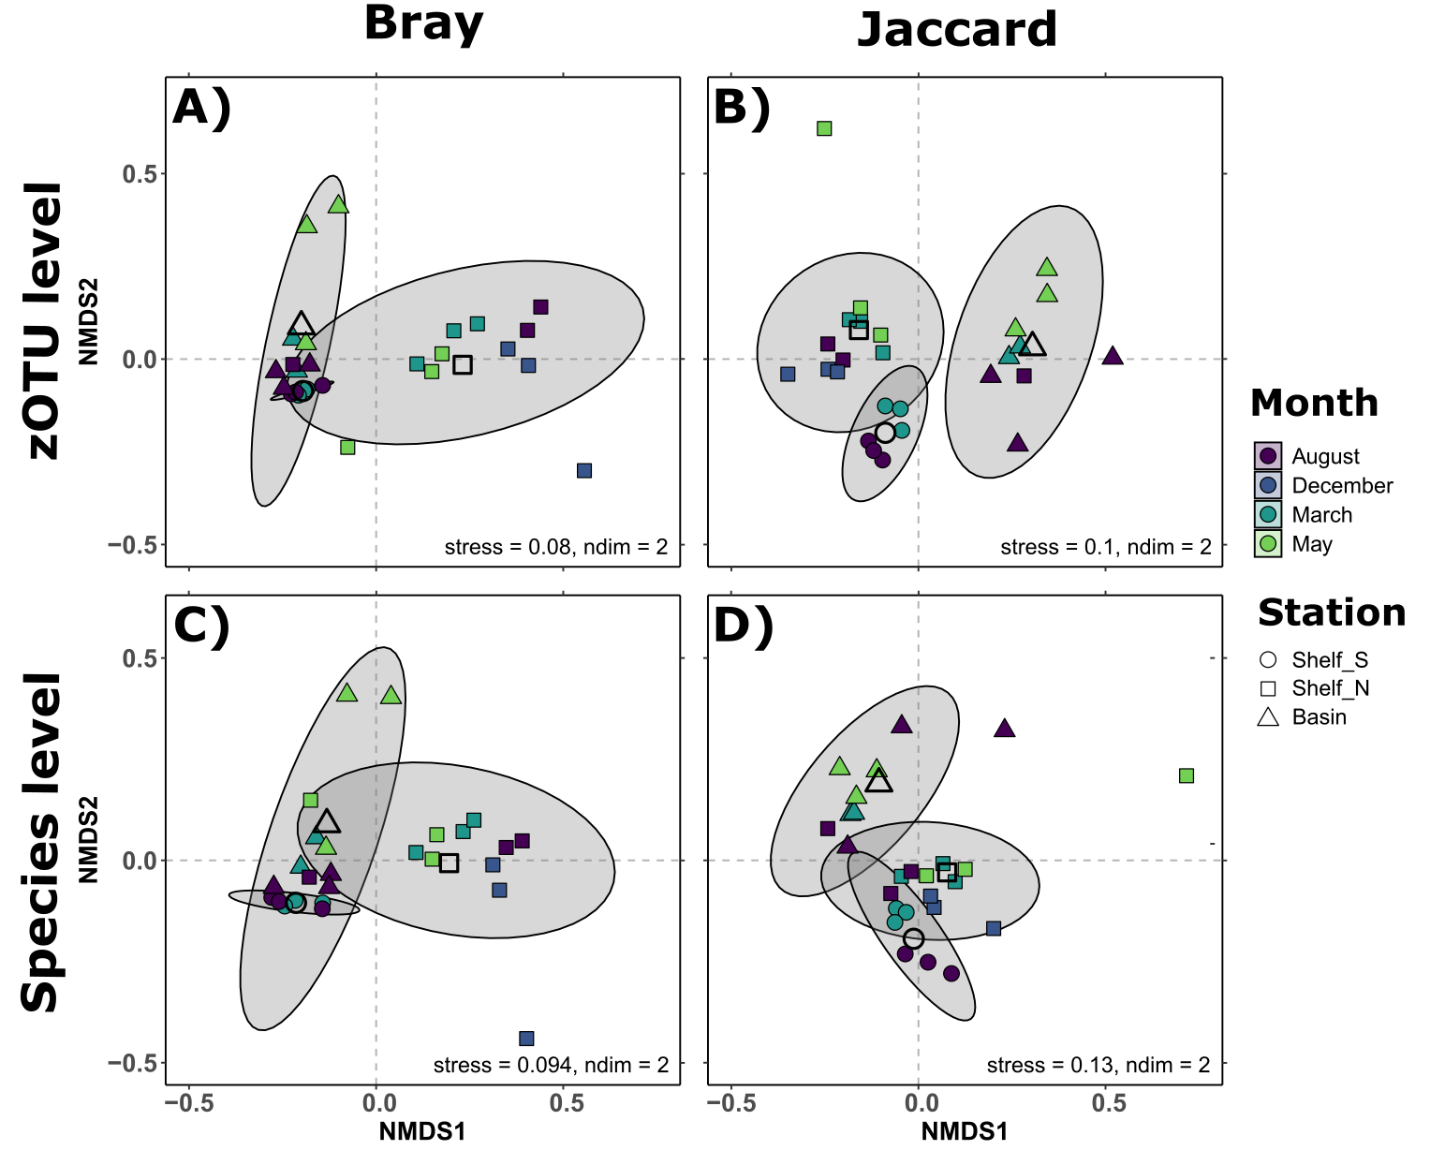


Fig. S3: Similarity patterns of sediment community compositions on the Barents Sea shelf and adjacent Nansen Basin. In A) and B), similarity patterns of community compositions are shown using Bray-Curtis (A), and Jaccard (B) dissimilarities computed from zOTU-level community data (included in the manuscript). In C) and D), similarity patterns of sediment community compositions are shown using Bray-Curtis (A), and Jaccard (B) dissimilarities computed from species-level community data. In all panels, sample points are colored according to month, and shapes denote the station sampled. Ellipses indicate 95% confidence levels, with centroids showing the average within-station position.
